# Supplementary material for: A copper-catalyzed three component reaction of aryl acetylene, sulfonyl azide and enaminone to form iminolactone via 6π electrocyclization
Source: Royal Society of Chemistry journal article supplement (doi:10.1039/c8cc06868b), 2018-01-01

# Copper-Catalyzed Three Component Reaction of Aryl Acetylene, Sulfonyl Azide and Enaminone to Form Iminolactone via 6 $\pi$ Electrocyclization

Jiarui Sun<sup>†</sup>, Xiangsheng Cheng<sup>†</sup>, John Kamanda Mansaray<sup>†</sup>, Weihong Fei<sup>†</sup>, Jieping Wan<sup>\*‡</sup> and Weijun Yao<sup>\*†</sup>

<sup>†</sup> Department of Chemistry, Zhejiang Sci-Tech University, Hangzhou, 310018, P.R. China

<sup>‡</sup> College of Chemistry and Chemical Engineering, Jiangxi Normal University, Nanchang, 330022, P.R. China

Email: [Orgywj@zstu.edu.cn](mailto:Orgywj@zstu.edu.cn); [wanjieping@jxnu.edu.cn](mailto:wanjieping@jxnu.edu.cn)

## Table of contents

|                                                                  |     |
|------------------------------------------------------------------|-----|
| A. General information                                           | S2  |
| B. General procedure for the three-component reaction            | S2  |
| C. Analytical data of iminolactones <b>4</b> and <b>5</b>        | S3  |
| D. Gram scale synthesis of iminolactones <b>4b</b> and <b>5b</b> | S14 |
| E. Transformation of <b>4a</b> and <b>5b</b>                     | S14 |
| F. X-Ray crystallographic analysis of <b>4b</b>                  | S16 |
| G. References                                                    | S17 |
| H. NMR spectra of the products                                   | S18 |

## **A. General information**

Unless otherwise specified, all reactions were carried out under a nitrogen atmosphere, with dry solvents in anhydrous conditions. THF, ethyl acetate (Ea), toluene, dichloromethane, 1,2-dichloroethane and acetonitrile were dried by activated molecular sieve (4 Å). All chemicals were used without further purification as commercially available unless otherwise noted. Thin-layer chromatography (TLC) was performed on silica gel plates (60F-254) using UV-light (254 and 365 nm). Flash chromatography was conducted on silica gel (200–300 mesh). Melting points are uncorrected.  $^1\text{H}$  and  $^{13}\text{C}$  NMR spectra were recorded on a Bruker AV400 MHz spectrometer. Chemical shifts were reported in parts per million (ppm). Infrared spectra (IR) were recorded by an ATR module and absorption bands are given in wavenumbers ( $\text{cm}^{-1}$ ). High resolution mass spectra (HRMS) were recorded on a Waters TOFMS GCT Premier using ESI ionization. Petroleum ether (PE) refers to the fraction with boiling point in the range 60–90 °C.

Enaminone **1** was prepared from corresponding ketone with *N,N*-dimethylformamide dimethyl acetal in toluene under reflux <sup>1</sup>. Sulfonyl azide **3** was prepared from corresponding sulfonyl chloride and sodium azide according to the reported procedure <sup>2</sup>.

## **B. General procedure for the three-component reaction**

To a flame dried round bottle flask with a magnetic stirring bar were added CuI (7.6 mg, 0.04 mmol, 10 mol %),  $\text{PPh}_3$  (21.0 mg, 0.08 mmol, 20 mol %) and enaminone **1** (0.4 mmol), followed by the addition of 1,2-dichloroethane (2 mL) and TEA (28  $\mu\text{L}$ , 0.2 mmol, 0.5 equiv.) under nitrogen atmosphere at room temperature. Aryl acetylene **2** (1 mmol, 2.5 equiv.) and sulfonyl azide **3** (1 mmol, 2.5 equiv.) was then added, and the resulting mixture was stirred overnight. After the completely consumption of enaminone **1** monitored by TLC, the solvent was removed under reduced pressure and the residue was purified by column chromatography on silica gel with PE/Ea as eluent to afford product **4** or **5**.

### C. Analytical data of iminolactone 4 and 5

4-methyl-N-(3-phenyl-6-(p-tolyl)-2H-pyran-2-ylidene)benzenesulfonamide **4a**

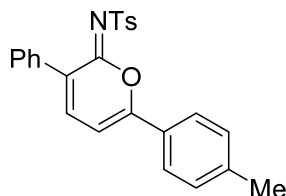

The title compound was prepared according to the general procedure to afford **4a** (118.0 mg, 71% yield) as a yellow powder. M.p. 138.1 – 142.4 °C; <sup>1</sup>H NMR (400 MHz, CDCl<sub>3</sub>) δ 7.93 (d, *J* = 8.2 Hz, 2H), 7.90 (d, *J* = 8.3 Hz, 2H), 7.65 – 7.57 (m, 2H), 7.50 (d, *J* = 7.4 Hz, 1H), 7.38 – 7.35 (m, 3H), 7.32 (d, *J* = 8.1 Hz, 2H), 7.22 (d, *J* = 8.1 Hz, 2H), 6.89 (d, *J* = 7.4 Hz, 1H), 2.43 (s, 3H), 2.38 (s, 3H); <sup>13</sup>C NMR (100 MHz, CDCl<sub>3</sub>) δ 160.1, 158.9, 142.6, 142.1, 141.1, 139.9, 134.3, 130.0, 129.2, 128.8, 128.7, 128.2, 127.3, 127.3, 126.5, 126.0, 103.2, 21.6, 21.5 ppm; IR (KBr) ν 3085, 3030, 2958, 2860, 1639, 1511, 1446, 1301 cm<sup>-1</sup>; HRMS (ESI) *m/z* calcd for C<sub>25</sub>H<sub>22</sub>NO<sub>3</sub>S [M+H]<sup>+</sup> = 416.1315, found = 416.1327.

N-(3,6-diphenyl-2H-pyran-2-ylidene)-4-methylbenzenesulfonamide **4b**

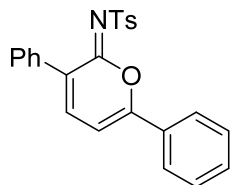

The title compound was prepared according to the general procedure to afford **4b** (126.7 mg, 79% yield) as a yellow powder. M.p. 168.6 – 172.8 °C; <sup>1</sup>H NMR (400 MHz, CDCl<sub>3</sub>) δ 8.07 – 8.00 (m, 2H), 7.90 (d, *J* = 8.1 Hz, 2H), 7.63 – 7.58 (m, 2H), 7.54 – 7.47 (m, 4H), 7.40 – 7.33 (m, 3H), 7.22 (d, *J* = 8.0 Hz, 2H), 6.93 (d, *J* = 7.4 Hz, 1H), 2.37 (s, 3H); <sup>13</sup>C NMR (100 MHz, CDCl<sub>3</sub>) δ 159.8, 158.8, 142.6, 140.7, 139.8, 134.2, 131.4, 130.1, 129.2, 129.2, 128.8, 128.8, 128.2, 128.0, 126.5, 126.0, 103.6, 21.5 ppm; IR (KBr) ν 3108, 3065, 2953, 2850, 1641, 1510, 1446, 1300 cm<sup>-1</sup>; HRMS (ESI) *m/z* calcd for C<sub>24</sub>H<sub>20</sub>NO<sub>3</sub>S [M+H]<sup>+</sup> = 402.1158, found = 402.1161.

N-(6-(4-methoxyphenyl)-3-phenyl-2H-pyran-2-ylidene)-4-methylbenzenesulfonamide **4c**

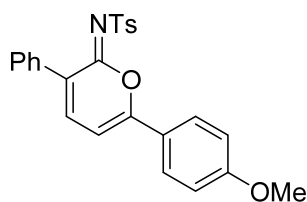

The title compound was prepared according to the general procedure to afford **4c** (110.5 mg, 64% yield) as a yellow powder. M.p. 129.2 – 132.5 °C; <sup>1</sup>H NMR (400 MHz, CDCl<sub>3</sub>) δ 7.99 (d, *J* = 8.7 Hz, 2H), 7.90 (d, *J* = 7.6 Hz, 2H), 7.62 – 7.57 (m, 2H), 7.47 (d, *J* = 7.4 Hz, 1H), 7.42 – 7.32 (m, 3H), 7.23 (d, *J* = 7.8 Hz, 2H), 7.01 (d, *J* = 8.7 Hz, 2H), 6.81 (d, *J* = 7.4 Hz, 1H), 3.86 (s, 3H), 2.37 (s, 3H); <sup>13</sup>C NMR (100 MHz, CDCl<sub>3</sub>) δ 162.3, 160.1, 159.0, 142.5, 141.2, 140.0, 134.4, 129.2, 128.7, 128.6, 128.2, 127.9, 126.5, 122.6, 114.7, 102.3, 55.5, 21.5 ppm; IR (KBr) ν 3055, 3025, 2960, 2835, 1634, 1511, 1446, 1146 cm<sup>-1</sup>; HRMS (ESI) *m/z* calcd for C<sub>25</sub>H<sub>22</sub>NO<sub>4</sub>S [M+H]<sup>+</sup> = 432.1264, found = 432.1277.

4-methyl-N-(3-phenyl-6-(m-tolyl)-2H-pyran-2-ylidene)benzenesulfonamide **4d**

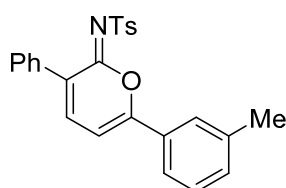

The title compound was prepared according to the general procedure to afford **4d** (121.3 mg, 73% yield) as a yellow powder. M.p. 128.3 – 131.6 °C; <sup>1</sup>H NMR (400 MHz, CDCl<sub>3</sub>) δ 7.90 (d, *J* = 8.2 Hz, 2H), 7.86 (d, *J* = 7.8 Hz, 1H), 7.80 (s, 1H), 7.64 – 7.58 (m, 2H), 7.50 (d, *J* = 7.4 Hz, 1H), 7.44 – 7.34 (m, 4H), 7.31 (d, *J* = 7.6 Hz, 1H), 7.22 (d, *J* = 8.1 Hz, 2H), 6.91 (d, *J* = 7.4 Hz, 1H), 2.45 (s, 3H), 2.37 (s, 3H); <sup>13</sup>C NMR (100 MHz, CDCl<sub>3</sub>) δ 160.1, 158.9, 142.5, 140.7, 139.9, 138.9, 134.3, 132.3, 130.0, 129.1, 128.8, 128.2, 127.8, 126.5, 123.4, 103.6, 21.6, 21.5 ppm; IR (KBr) ν 3098, 3045, 2915, 2853, 1636, 1514, 1446, 1311 cm<sup>-1</sup>; HRMS (ESI) *m/z* calcd for C<sub>25</sub>H<sub>22</sub>NO<sub>3</sub>S [M+H]<sup>+</sup> = 416.1315, found = 416.1330.

N-(6-(4-fluorophenyl)-3-phenyl-2H-pyran-2-ylidene)-4-methylbenzenesulfonamide **4e**

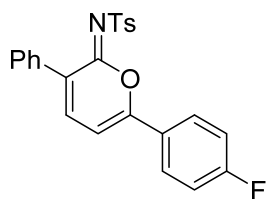

The title compound was prepared according to the general procedure to afford **4e** (72.1 mg, 43% yield) as a yellow

powder. M.p. 192.7 – 195.8 °C; <sup>1</sup>H NMR (400 MHz, CDCl<sub>3</sub>) δ 8.05 (dd, *J* = 7.9, 5.4 Hz, 2H), 7.91 (d, *J* = 7.9 Hz, 2H), 7.58 (d, *J* = 3.7 Hz, 2H), 7.48 (d, *J* = 7.3 Hz, 1H), 7.40 – 7.34 (m, 3H), 7.25 (d, *J* = 7.9 Hz, 2H), 7.19 (t, *J* = 8.4 Hz, 2H), 6.88 (d, *J* = 7.3 Hz, 1H), 2.39 (s, 3H); <sup>13</sup>C NMR (101 MHz, CDCl<sub>3</sub>) δ 164.60 (*J*<sub>C-F</sub> = 253.4 Hz), 158.7, 158.7, 142.7, 140.7, 139.7, 134.1, 129.2, 128.9, 128.7, 128.3 (*J*<sub>C-F</sub> = 9.3 Hz), 128.2, 127.8, 126.4, 116.52 (*J*<sub>C-F</sub> = 22.2 Hz), 103.3, 21.5 ppm; IR (KBr) ν 3098, 3043, 2923, 2868, 1639, 1501, 1441, 1296 cm<sup>-1</sup>; HRMS (ESI) *m/z* calcd for C<sub>24</sub>H<sub>19</sub>FNO<sub>3</sub>S [M+H]<sup>+</sup> = 420.1064, found = 420.1075.

N-(6-(4-chlorophenyl)-3-phenyl-2H-pyran-2-ylidene)-4-methylbenzenesulfonamide **4f**

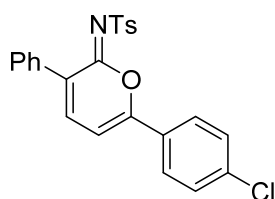

The title compound was prepared according to the general procedure to afford **4f** (87.2 mg, 50% yield) as a yellow powder. M.p. 169.8 – 173.5 °C; <sup>1</sup>H NMR (400 MHz, CDCl<sub>3</sub>) δ 7.97 (d, *J* = 8.2 Hz, 2H), 7.88 (d, *J* = 7.9 Hz, 2H), 7.62 – 7.55 (m, 2H), 7.51 – 7.44 (m, 3H), 7.40 – 7.33 (m, 3H), 7.24 (d, *J* = 8.1 Hz, 2H), 6.90 (d, *J* = 7.3 Hz, 1H), 2.38 (s, 3H); <sup>13</sup>C NMR (100 MHz, CDCl<sub>3</sub>) δ 158.6, 158.5, 142.8, 140.4, 139.7, 137.6, 134.0, 129.6, 129.2, 129.0, 128.7, 128.5, 128.3, 128.3, 127.2, 126.5, 103.7, 21.5 ppm; IR (KBr) ν 3088, 3065, 2950, 2865, 1636, 1519, 1446, 1294 cm<sup>-1</sup>; HRMS (ESI) *m/z* calcd for C<sub>24</sub>H<sub>19</sub>ClNO<sub>3</sub>S [M+H]<sup>+</sup> = 436.0769, found = 436.0770.

N-(6-(2-bromophenyl)-3-phenyl-2H-pyran-2-ylidene)-4-methylbenzenesulfonamide **4g**

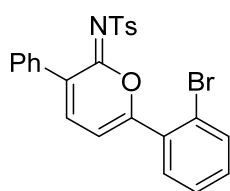

The title compound was prepared according to the general procedure to afford **4g** (99.9 mg, 52% yield) as a yellow powder. M.p. 158.8 – 161.9 °C; <sup>1</sup>H NMR (400 MHz, CDCl<sub>3</sub>) δ 8.04 (d, *J* = 7.7 Hz, 1H), 7.81 (d, *J* = 7.8 Hz, 2H), 7.70 (d, *J* = 7.9 Hz, 1H), 7.64 (d, *J* = 4.9 Hz, 2H), 7.54 – 7.49 (m, 2H), 7.42 – 7.29 (m, 4H), 7.19 (d, *J* = 7.3 Hz, 1H), 7.14 (d, *J* = 7.7 Hz, 2H), 2.35 (s, 3H); <sup>13</sup>C NMR (100 MHz, CDCl<sub>3</sub>) δ 158.8, 157.8, 142.7, 139.5, 134.3, 134.0, 131.8, 131.2, 129.0, 128.9, 128.3, 128.2, 126.8, 121.0, 109.5, 21.4 ppm; IR (KBr) ν 3065, 3025, 2950, 2865, 1639, 1529, 1309, 1149 cm<sup>-1</sup>; HRMS (ESI) *m/z* calcd for C<sub>24</sub>H<sub>19</sub>BrNO<sub>3</sub>S [M+H]<sup>+</sup> = 480.0264, found = 480.0271.

4-methyl-N-(6-(naphthalen-2-yl)-3-phenyl-2H-pyran-2-ylidene)benzenesulfonamide **4h**

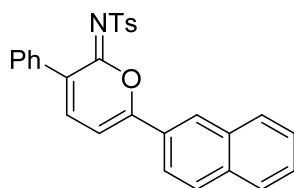

The title compound was prepared according to the general procedure to afford **4h** (92.1 mg, 51% yield) as a yellow powder. M.p. 220.0 – 222.6 °C; <sup>1</sup>H NMR (400 MHz, CDCl<sub>3</sub>) δ 8.67 (s, 1H), 8.06 – 8.02 (m, 1H), 8.00 – 7.93 (m, 4H), 7.90 – 7.85 (m, 1H), 7.65 – 7.63 (m, 2H), 7.60 – 7.53 (m, 3H), 7.41 – 7.38 (m, 3H), 7.22 (d, *J* = 8.1 Hz, 2H), 7.06 (d, *J* = 7.4 Hz, 1H), 2.36 (s, 3H); <sup>13</sup>C NMR (100 MHz, CDCl<sub>3</sub>) δ 159.9, 158.8, 142.6, 140.7, 139.8, 134.6, 134.2, 133.1, 129.5, 129.2, 129.1, 128.8, 128.3, 128.0, 127.8, 127.2, 127.1, 126.6, 122.0, 104.0, 21.5 ppm; IR (KBr) ν 3055, 3033, 2955, 2850, 1634, 1526, 1289, 1144 cm<sup>-1</sup>; HRMS (ESI) *m/z* calcd for C<sub>28</sub>H<sub>22</sub>NO<sub>3</sub>S [M+H]<sup>+</sup> = 452.1315, found = 452.1322.

N-(6-([1,1'-biphenyl]-4-yl)-3-phenyl-2H-pyran-2-ylidene)-4-methylbenzenesulfonamide **4i**

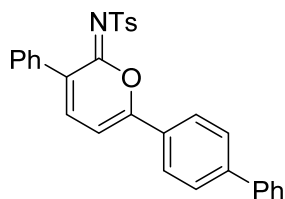

The title compound was prepared according to the general procedure to afford **4i** (108.9 mg, 57% yield) as a yellow powder. M.p. 209.5 – 211.8 °C; <sup>1</sup>H NMR (400 MHz, CDCl<sub>3</sub>) δ 8.11 (d, *J* = 8.4 Hz, 2H), 7.92 (d, *J* = 8.2 Hz, 2H), 7.75 (d, *J* = 8.4 Hz, 2H), 7.67 – 7.58 (m, 4H), 7.54 – 7.46 (m, 3H), 7.44 – 7.34 (m, 4H), 7.28 – 7.20 (m, 3H), 6.97 (d, *J* = 7.4 Hz, 1H), 2.38 (s, 3H); <sup>13</sup>C NMR (100 MHz, CDCl<sub>3</sub>) δ 159.6, 158.8, 144.1, 142.6, 140.7, 139.8, 134.2, 129.2, 129.0, 128.8, 128.2, 128.2, 127.8, 127.1, 126.5, 103.5, 21.5 ppm; IR (KBr) ν 3060, 3030, 2958, 2853, 1636, 1514, 1299, 1156 cm<sup>-1</sup>; HRMS (ESI) *m/z* calcd for C<sub>30</sub>H<sub>24</sub>NO<sub>3</sub>S [M+H]<sup>+</sup> = 478.1471, found = 478.1475.

4-methyl-N-(3-phenyl-6-(thiophen-2-yl)-2H-pyran-2-ylidene)benzenesulfonamide **4j**

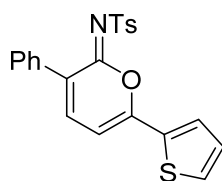

The title compound was prepared according to the general procedure to afford **4j** (97.8 mg, 60% yield) as a yellow powder. M.p. 65.6 – 68.2 °C; <sup>1</sup>H NMR (400 MHz, CDCl<sub>3</sub>) δ 7.94 (d, *J* = 3.3 Hz, 1H), 7.90 (d, *J* = 8.0 Hz, 2H), 7.62 – 7.56 (m, 2H), 7.51 (d, *J* = 4.9 Hz, 1H), 7.45 (d, *J* = 7.4 Hz, 1H), 7.39 – 7.34 (m, 3H), 7.25 (d, *J* = 8.0 Hz, 2H), 7.17 (t, *J* = 4.3 Hz, 1H), 6.72 (d, *J* = 7.4 Hz, 1H), 2.39 (s, 3H); <sup>13</sup>C NMR (100 MHz, CDCl<sub>3</sub>) δ 158.1, 155.3, 142.6, 140.6, 139.9, 134.3, 133.4, 129.8, 129.6, 129.2, 128.9, 128.7, 128.2, 127.4, 126.5, 102.7, 21.5 ppm; IR (KBr) ν 3080, 3030, 2920, 2855, 1634, 1529, 1416, 1146 cm<sup>-1</sup>; HRMS (ESI) *m/z* calcd for C<sub>22</sub>H<sub>18</sub>NO<sub>3</sub>S<sub>2</sub> [M+H]<sup>+</sup> = 408.0723, found = 408.0732.

4-methyl-N-(3-phenyl-6-((E)-styryl)-2H-pyran-2-ylidene)benzenesulfonamide **4k**

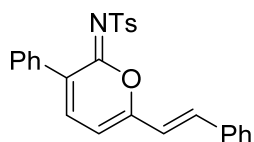

The title compound was prepared according to the general procedure to afford **4k** (104.3mg, 61% yield) as a yellow powder. M.p. 77.4 – 80.8 °C; <sup>1</sup>H NMR (400 MHz, CDCl<sub>3</sub>) δ 7.91 (d, *J* = 8.2 Hz, 2H), 7.85 (d, *J* = 15.9 Hz, 1H), 7.60 – 7.57 (m, 4H), 7.44 – 7.31 (m, 7H), 7.25 (d, *J* = 8.4 Hz, 2H), 6.68 (d, *J* = 15.9 Hz, 1H), 6.41 (d, *J* = 7.3 Hz, 1H), 2.38 (s, 3H); <sup>13</sup>C NMR (100 MHz, CDCl<sub>3</sub>) δ 158.5, 142.6, 140.6, 140.0, 137.8, 135.4, 134.4, 129.7, 129.2, 128.9, 128.8, 128.2, 128.0, 127.9, 126.5, 117.2, 107.1, 21.5 ppm; IR (KBr) ν 3060, 3028, 2950, 2858, 1644, 1524, 1446, 1301 cm<sup>-1</sup>; HRMS (ESI) *m/z* calcd for C<sub>26</sub>H<sub>22</sub>NO<sub>3</sub>S [M+H]<sup>+</sup> = 428.1315, found = 428.1321.

4-methyl-N-(3-phenyl-6-(phenylethynyl)-2H-pyran-2-ylidene)benzenesulfonamide **4l**

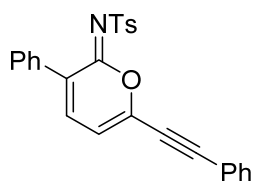

The title compound was prepared according to the general procedure to afford **4l** (69.8mg, 41% yield) as a yellow powder. M.p. 221.5 – 223.1 °C; <sup>1</sup>H NMR (400 MHz, CDCl<sub>3</sub>) δ 8.00 (d, *J* = 8.2 Hz, 2H), 7.66 – 7.56 (m, 4H), 7.51 – 7.42 (m, 3H), 7.41 – 7.36 (m, 3H), 7.34 (d, *J* = 7.3 Hz, 1H), 7.24 (d, *J* = 8.1 Hz, 2H), 6.68 (d, *J* = 7.3 Hz, 1H), 2.37 (s, 3H); <sup>13</sup>C NMR (100 MHz, CDCl<sub>3</sub>) δ 158.1, 143.2, 142.9, 139.0, 138.8, 133.9, 132.1, 130.5, 130.4, 129.2, 129.0, 128.8, 128.7, 128.3, 127.9, 120.4, 112.7, 98.3, 80.7, 21.5 ppm; IR (KBr) ν 3095, 3058, 3030, 2960, 2208, 1629, 1451, 1309 cm<sup>-1</sup>; HRMS (ESI) *m/z* calcd for C<sub>26</sub>H<sub>20</sub>NO<sub>3</sub>S [M+H]<sup>+</sup> = 426.1158, found = 426.1152.

4-methyl-N-(6-phenyl-3-(p-tolyl)-2H-pyran-2-ylidene)benzenesulfonamide **4m**

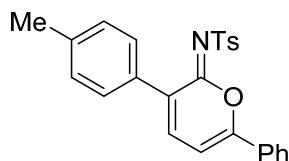

The title compound was prepared according to the general procedure to afford **4m** (86.4 mg, 52% yield) as a yellow powder. M.p. 193.5 – 196.7 °C; <sup>1</sup>H NMR (400 MHz, CDCl<sub>3</sub>) δ 8.02 (dd, *J* = 7.5, 1.7 Hz, 2H), 7.91 (d, *J* = 8.2 Hz, 2H), 7.55 – 7.45 (m, 6H), 7.22 (d, *J* = 8.1 Hz, 2H), 7.17 (d, *J* = 8.0 Hz, 2H), 6.91 (d, *J* = 7.4 Hz, 1H), 2.37 (s, 3H), 2.36 (s, 3H); <sup>13</sup>C NMR (100 MHz, CDCl<sub>3</sub>) δ 159.5, 158.9, 142.6, 140.3, 139.8, 138.9, 131.3, 131.2, 130.1, 129.2, 129.1, 128.9, 128.6, 127.9, 126.5, 125.9, 103.8, 21.5, 21.3 ppm; IR (KBr) ν 3090, 3052, 2952, 2851, 1637, 1494, 1300, 1141 cm<sup>-1</sup>; HRMS (ESI) *m/z* calcd for C<sub>25</sub>H<sub>22</sub>NO<sub>3</sub>S [M+H]<sup>+</sup> = 416.1315, found = 416.1324.

4-methyl-N-(6-phenyl-3-(m-tolyl)-2H-pyran-2-ylidene)benzenesulfonamide **4n**

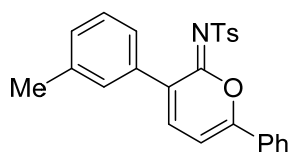

The title compound was prepared according to the general procedure to afford **4n** (89.7 mg, 54% yield) as a yellow powder. M.p. 150.8 – 154.2 °C; <sup>1</sup>H NMR (400 MHz, CDCl<sub>3</sub>) δ 8.08 – 8.00 (m, 2H), 7.91 (d, *J* = 8.2 Hz, 2H), 7.54 – 7.48 (m, 4H), 7.43 (s, 1H), 7.41 (d, *J* = 7.8 Hz, 1H), 7.30 – 7.26 (m, 1H), 7.23 (d, *J* = 8.1 Hz, 2H), 7.17 (d, *J* = 7.5 Hz, 1H), 6.93 (d, *J* = 7.4 Hz, 1H), 2.38 (s, 3H), 2.35 (s, 3H); <sup>13</sup>C NMR (100 MHz, CDCl<sub>3</sub>) δ 159.7, 158.8, 142.5, 140.4, 140.0, 137.8, 134.1, 131.4, 130.1, 129.6, 129.5, 129.2, 129.1, 128.1, 126.5, 126.0, 125.9, 103.5, 21.5, 21.4 ppm; IR (KBr) ν 3055, 3028, 2954, 2857, 1634, 1496, 1301, 1155 cm<sup>-1</sup>; HRMS (ESI) *m/z* calcd for C<sub>25</sub>H<sub>22</sub>NO<sub>3</sub>S [M+H]<sup>+</sup> = 416.1315, found = 416.1321.

4-methyl-N-(6-phenyl-3-(o-tolyl)-2H-pyran-2-ylidene)benzenesulfonamide **4o**

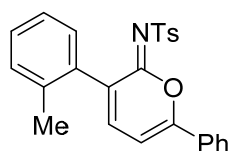

The title compound was prepared according to the general procedure to afford **4o** (66.5 mg, 40% yield) as a yellow powder. M.p. 157.3 – 161.3 °C; <sup>1</sup>H NMR (400 MHz, CDCl<sub>3</sub>) δ 8.09 – 8.02 (m, 2H), 7.80 (d, *J* = 8.1 Hz, 2H), 7.56 –



7.51 (m, 3H), 7.34 (d,  $J = 7.2$  Hz, 1H), 7.30 – 7.26 (m, 1H), 7.24 – 7.14 (m, 5H), 6.92 (d,  $J = 7.3$  Hz, 1H), 2.34 (s, 3H), 2.26 (s, 3H);  $^{13}\text{C}$  NMR (100 MHz,  $\text{CDCl}_3$ )  $\delta$  160.2, 158.8, 142.5, 142.1, 139.7, 136.8, 134.3, 131.5, 130.2, 130.1, 129.8, 129.4, 129.2, 129.1, 128.7, 126.5, 126.1, 125.8, 103.1, 21.5, 20.1 ppm; IR (KBr)  $\nu$  3080, 3063, 2962, 2863, 1636, 1506, 1449, 1294  $\text{cm}^{-1}$ ; HRMS (ESI)  $m/z$  calcd for  $\text{C}_{25}\text{H}_{22}\text{NO}_3\text{S}$   $[\text{M}+\text{H}]^+ = 416.1315$ , found = 416.1328.

4-methyl-N-(6-phenyl-3-(4-propylphenyl)-2H-pyran-2-ylidene)benzenesulfonamide **4p**

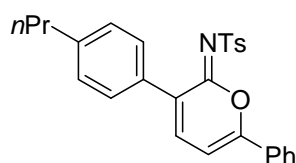

The title compound was prepared according to the general procedure to afford **4p** (97.5 mg, 55% yield) as a yellow powder. M.p. 126.5 – 128.6  $^{\circ}\text{C}$ ;  $^1\text{H}$  NMR (400 MHz,  $\text{CDCl}_3$ )  $\delta$  8.03 (dd,  $J = 7.7, 1.7$  Hz, 2H), 7.91 (d,  $J = 8.2$  Hz, 2H), 7.54 (d,  $J = 8.2$  Hz, 2H), 7.55 – 7.48 (m, 4H), 7.22 (d,  $J = 8.0$  Hz, 2H), 7.19 (d,  $J = 8.1$  Hz, 2H), 6.92 (d,  $J = 7.4$  Hz, 1H), 2.66 – 2.54 (m, 2H), 2.38 (s, 3H), 1.1.73 – 1.60 (m, 2H), 0.96 (t,  $J = 7.3$  Hz, 3H);  $^{13}\text{C}$  NMR (100 MHz,  $\text{CDCl}_3$ )  $\delta$  159.5, 158.9, 143.7, 142.5, 140.2, 139.9, 131.5, 131.3, 130.1, 129.2, 129.1, 128.6, 128.3, 128.0, 126.5, 125.9, 103.6, 24.4, 21.5, 13.9 ppm; IR (KBr)  $\nu$  3080, 3026, 2953, 2928, 2865, 1639, 1509, 1306  $\text{cm}^{-1}$ ; HRMS (ESI)  $m/z$  calcd for  $\text{C}_{27}\text{H}_{26}\text{NO}_3\text{S}$   $[\text{M}+\text{H}]^+ = 444.1628$ , found = 444.1639.

N-(3-(4-methoxyphenyl)-6-phenyl-2H-pyran-2-ylidene)-4-methylbenzenesulfonamide **4q**

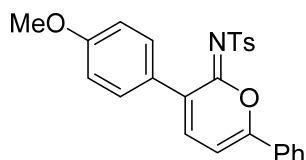

The title compound was prepared according to the general procedure to afford **4q** (81.1 mg, 47% yield) as a yellow powder. M.p. 160.2 – 162.9  $^{\circ}\text{C}$ ;  $^1\text{H}$  NMR (400 MHz,  $\text{CDCl}_3$ )  $\delta$  8.02 (d,  $J = 6.3$  Hz, 2H), 7.91 (d,  $J = 8.1$  Hz, 2H), 7.57 (d,  $J = 8.7$  Hz, 2H), 7.53 – 7.47 (m, 4H), 7.23 (d,  $J = 8.0$  Hz, 2H), 6.92 – 6.88 (m, 2H), 3.82 (s, 3H), 2.38 (s, 3H);  $^{13}\text{C}$  NMR (100 MHz,  $\text{CDCl}_3$ )  $\delta$  160.1, 159.2, 159.0, 142.6, 139.9, 139.6, 131.2, 130.2, 130.1, 129.2, 129.1, 127.6, 126.5, 125.9, 113.7, 103.7, 55.3, 21.5 ppm; IR (KBr)  $\nu$  3013, 3065, 2960, 2838, 1634, 1511, 1496, 1309  $\text{cm}^{-1}$ ; HRMS (ESI)  $m/z$  calcd for  $\text{C}_{25}\text{H}_{22}\text{NO}_4\text{S}$   $[\text{M}+\text{H}]^+ = 432.1264$ , found = 432.1271.

N-(3-(3-fluorophenyl)-6-phenyl-2H-pyran-2-ylidene)-4-methylbenzenesulfonamide **4r**

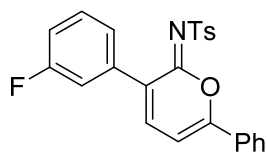

The title compound was prepared according to the general procedure to afford **4r** (105.7 mg, 63% yield) as a yellow powder. M.p. 159.9 – 162.9 °C; <sup>1</sup>H NMR (400 MHz, CDCl<sub>3</sub>) δ 8.05 (dd, *J* = 6.6, 2.8 Hz, 2H), 7.90 (d, *J* = 8.2 Hz, 2H), 7.58 – 7.50 (m, 4H), 7.42 – 7.30 (m, 3H), 7.25 (d, *J* = 8.1 Hz, 2H), 7.06 (t, *J* = 7.9 Hz, 1H), 6.95 (d, *J* = 7.4 Hz, 1H), 2.39 (s, 3H); <sup>13</sup>C NMR (100 MHz, CDCl<sub>3</sub>) δ 162.4 (*J*<sub>C-F</sub> = 245.7 Hz), 160.2, 158.3, 142.8, 141.1, 139.7, 136.1 (*J*<sub>C-F</sub> = 8.2 Hz), 131.6, 129.9, 129.8 (*J*<sub>C-F</sub> = 8.3 Hz), 129.3, 126.5, 126.1, 124.4 (*J*<sub>C-F</sub> = 2.2 Hz), 115.9 (*J*<sub>C-F</sub> = 17.2 Hz), 115.7 (*J*<sub>C-F</sub> = 15.1 Hz), 103.5, 21.5 ppm; IR (KBr) ν 3100, 3070, 2960, 2853, 1641, 1494, 1301, 1149 cm<sup>-1</sup>; HRMS (ESI) *m/z* calcd for C<sub>24</sub>H<sub>19</sub>FNO<sub>3</sub>S [M+H]<sup>+</sup> = 420.1064, found = 420.1076.

4-methyl-N-(6-phenyl-3-(thiophen-3-yl)-2H-pyran-2-ylidene)benzenesulfonamide **4s**

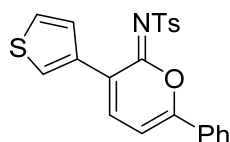

The title compound was prepared according to the general procedure to afford **4s** (99.4 mg, 61% yield) as a yellow powder. M.p. 206.1 – 208.3 °C; <sup>1</sup>H NMR (400 MHz, CDCl<sub>3</sub>) δ 8.07 (d, *J* = 2.2 Hz, 1H), 8.10 – 8.01 (m, 3H), 7.96 (d, *J* = 8.1 Hz, 2H), 7.72 (d, *J* = 7.6 Hz, 1H), 7.54 – 7.48 (m, 3H), 7.42 (d, *J* = 5.0 Hz, 1H), 7.34 – 7.30 (m, 1H), 7.27 (d, *J* = 8.1 Hz, 2H), 6.93 (d, *J* = 7.6 Hz, 1H), 2.41 (s, 3H); <sup>13</sup>C NMR (100 MHz, CDCl<sub>3</sub>) δ 158.9, 157.9, 142.8, 138.3, 133.4, 131.4, 130.0, 129.3, 129.3, 126.6, 126.5, 126.4, 126.4, 126.0, 125.4, 122.2, 103.4, 21.5 ppm; IR (KBr) ν 3143, 3093, 2955, 2848, 1634, 1496, 1301, 1151 cm<sup>-1</sup>; HRMS (ESI) *m/z* calcd for C<sub>22</sub>H<sub>18</sub>NO<sub>3</sub>S<sub>2</sub> [M+H]<sup>+</sup> = 408.0723, found = 408.0735.

4-methyl-N-(3-(naphthalen-2-yl)-6-phenyl-2H-pyran-2-ylidene)benzenesulfonamide **4t**

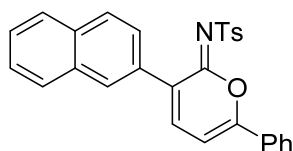

The title compound was prepared according to the general procedure to afford **4t** (92.1 mg, 51% yield) as a yellow powder. M.p. 191.8 – 194.6 °C; <sup>1</sup>H NMR (400 MHz, CDCl<sub>3</sub>) δ 8.13 – 8.06 (m, 3H), 7.92 (d, *J* = 8.3 Hz, 2H), 7.85 –

7.80 (m, 3H), 7.74 (dd,  $J = 8.6, 1.7$  Hz, 1H), 7.65 (d,  $J = 7.4$  Hz, 1H), 7.56 – 7.48 (m, 5H), 7.22 (d,  $J = 8.1$  Hz, 2H), 6.99 (d,  $J = 7.4$  Hz, 1H), 2.38 (s, 3H);  $^{13}\text{C}$  NMR (100 MHz,  $\text{CDCl}_3$ )  $\delta$  159.8, 158.8, 142.6, 140.8, 139.9, 133.3, 133.0, 131.7, 131.5, 130.1, 129.3, 129.2, 128.4, 127.9, 127.7, 127.6, 126.8, 126.5, 126.4, 126.2, 126.0, 103.6, 21.5 ppm; IR (KBr)  $\nu$  3065, 2958, 2925<sup>1</sup>, 2856, 1636, 1449, 1301, 1146  $\text{cm}^{-1}$ ; HRMS (ESI)  $m/z$  calcd for  $\text{C}_{28}\text{H}_{22}\text{NO}_3\text{S}$   $[\text{M}+\text{H}]^+ = 452.1315$ , found = 452.1324.

N-(3,6-diphenyl-2H-pyran-2-ylidene)-4-fluorobenzenesulfonamide **4u**

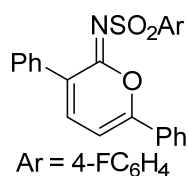

The title compound was prepared according to the general procedure to afford **4u** (92.1 mg, 51% yield) as a yellow powder. M.p. 168.2 – 170.5  $^\circ\text{C}$ ;  $^1\text{H}$  NMR (400 MHz,  $\text{CDCl}_3$ )  $\delta$  8.07 – 7.97 (m, 4H), 7.58 (dd,  $J = 6.1, 2.7$  Hz, 2H), 7.56 – 7.49 (m, 4H), 7.42 – 7.33 (m, 3H), 7.10 (t,  $J = 8.6$  Hz, 2H), 6.97 (d,  $J = 7.4$  Hz, 1H);  $^{13}\text{C}$  NMR (100 MHz,  $\text{CDCl}_3$ )  $\delta$  164.7 ( $J_{\text{C-F}} = 253.1$  Hz), 159.9, 159.1, 141.0, 138.8, 134.1, 131.6, 130.0, 129.3, 129.2, 129.0 ( $J_{\text{C-F}} = 16.7$  Hz), 128.7, 128.3, 127.9, 126.0, 115.7 ( $J_{\text{C-F}} = 22.5$  Hz), 103.8 ppm; IR (KBr)  $\nu$  3103, 3083, 2963, 2925, 1636, 1511, 1444, 1311  $\text{cm}^{-1}$ ; HRMS (ESI)  $m/z$  calcd for  $\text{C}_{23}\text{H}_{17}\text{FNO}_3\text{S}$   $[\text{M}+\text{H}]^+ = 406.0908$ , found = 406.0915.

N-(3,6-diphenyl-2H-pyran-2-ylidene)methanesulfonamide **4v**

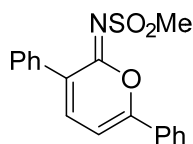

The title compound was prepared according to the general procedure to afford **4v** (83.3 mg, 64% yield) as a yellow powder. M.p. 160.7 – 163.1  $^\circ\text{C}$ ;  $^1\text{H}$  NMR (400 MHz,  $\text{CDCl}_3$ )  $\delta$  8.05 – 8.00 (m, 2H), 7.65 – 7.60 (m, 2H), 7.51 (d,  $J = 3.0$  Hz, 2H), 7.50 (d,  $J = 2.0$  Hz, 2H), 7.46 – 7.38 (m, 3H), 6.94 (d,  $J = 7.4$  Hz, 1H), 3.11 (s, 3H);  $^{13}\text{C}$  NMR (100 MHz,  $\text{CDCl}_3$ )  $\delta$  159.7, 158.9, 140.6, 134.3, 131.4, 129.9, 129.3, 128.9, 128.8, 128.3, 127.7, 125.9, 103.2, 42.9 ppm; IR (KBr)  $\nu$  3025, 2955, 2925, 2858, 1636, 1451, 1301, 1122  $\text{cm}^{-1}$ ; HRMS (ESI)  $m/z$  calcd for  $\text{C}_{18}\text{H}_{16}\text{NO}_3\text{S}$   $[\text{M}+\text{H}]^+ = 326.0845$ , found = 326.0860.

N-(3,6-diphenyl-2H-pyran-2-ylidene)-2-nitrobenzenesulfonamide **4w**

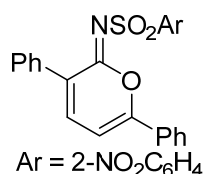

The title compound was prepared according to the general procedure to afford **4w** (107.2 mg, 62% yield) as a yellow powder. M.p. 148.8 – 151.2 °C; <sup>1</sup>H NMR (400 MHz, CDCl<sub>3</sub>) δ 8.26 (dd, *J* = 6.0, 3.3 Hz, 1H), 8.04 – 7.98 (m, 2H), 7.75 (dd, *J* = 5.8, 3.4 Hz, 1H), 7.64 (dd, *J* = 5.9, 3.4 Hz, 2H), 7.58 (dd, *J* = 10.5, 5.0 Hz, 3H), 7.53 – 7.47 (m, 3H), 7.41 – 7.33 (m, 3H), 7.02 (d, *J* = 7.5 Hz, 1H); <sup>13</sup>C NMR (100 MHz, CDCl<sub>3</sub>) δ 160.1, 159.7, 147.8, 141.8, 135.7, 133.9, 132.9, 132.0, 131.7, 129.8, 129.8, 129.3, 128.9, 128.8, 128.4, 128.0, 126.0, 124.5, 104.0; IR (KBr) ν 3095, 3060, 2958, 2855, 1639, 1456, 1314, 1161 cm<sup>-1</sup>; HRMS (ESI) *m/z* calcd for C<sub>23</sub>H<sub>17</sub>N<sub>2</sub>O<sub>5</sub>S [M+H]<sup>+</sup> = 433.0853, found = 433.0862.

4-methyl-N-(3-phenylindeno[1,2-b]pyran-2(5H)-ylidene)benzenesulfonamide **5a**

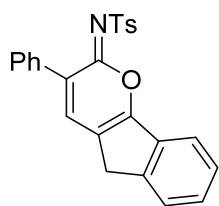

The title compound was prepared according to the general procedure to afford **5a** (122.4 mg, 74% yield) as a yellow powder. M.p. 226.1 – 228.4 °C; <sup>1</sup>H NMR (400 MHz, CDCl<sub>3</sub>) δ 8.00 (d, *J* = 8.1 Hz, 2H), 7.84 (d, *J* = 7.5 Hz, 1H), 7.67 (s, 1H), 7.62 (d, *J* = 6.7 Hz, 2H), 7.55 (d, *J* = 7.1 Hz, 1H), 7.52 – 7.42 (m, 2H), 7.42 – 7.33 (m, 3H), 7.27 (d, *J* = 8.1 Hz, 2H), 3.70 (s, 2H), 2.38 (s, 3H); <sup>13</sup>C NMR (100 MHz, CDCl<sub>3</sub>) δ 160.0, 158.9, 143.0, 142.6, 139.3, 135.2, 133.9, 129.4, 129.2, 129.0, 128.6, 128.2, 127.9, 127.0, 126.7, 125.2, 120.6, 120.4, 33.3, 21.5 ppm; IR (KBr) ν 2965, 2928, 2858, 1626, 1494, 1459, 1306, 1154 cm<sup>-1</sup>; HRMS (ESI) *m/z* calcd for C<sub>25</sub>H<sub>20</sub>NO<sub>3</sub>S [M+H]<sup>+</sup> = 414.1158, found = 414.1167.

4-methyl-N-(3-phenyl-5,6-dihydro-2H-benzo[h]chromen-2-ylidene)benzenesulfonamide **5b**

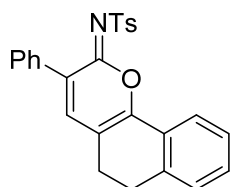

The title compound was prepared according to the general procedure to afford **5b** (128.2 mg, 75% yield) as a yellow powder. M.p. 218.5 – 221.5 °C; <sup>1</sup>H NMR (400 MHz, CDCl<sub>3</sub>) δ 8.15 (d, *J* = 7.3 Hz, 1H), 7.92 (d, *J* = 8.2 Hz, 2H), 7.62 (dd, *J* = 7.6, 1.7 Hz, 2H), 7.46 – 7.33 (m, 6H), 7.23 (t, *J* = 7.8 Hz, 3H), 2.97 (t, *J* = 7.8 Hz, 2H), 2.78 (t, *J* = 7.8 Hz, 2H), 2.38 (s, 3H); <sup>13</sup>C NMR (100 MHz, CDCl<sub>3</sub>) δ 158.7, 154.7, 142.6, 142.5, 140.1, 137.0, 134.5, 130.9, 129.2, 128.8, 128.7, 128.2, 127.8, 126.9, 126.5, 124.3, 114.9, 27.2, 24.6, 21.5 ppm; IR (KBr) ν 3058, 2960, 2920, 2888, 1644, 1504, 1449, 1301 cm<sup>-1</sup>; HRMS (ESI) *m/z* calcd for C<sub>26</sub>H<sub>22</sub>NO<sub>3</sub>S [M+H]<sup>+</sup> = 428.1315, found = 428.1328.

N-(3-(4-chlorophenyl)-5,6-dihydro-2H-benzo[h]chromen-2-ylidene)-4-methylbenzenesulfonamide **5c**

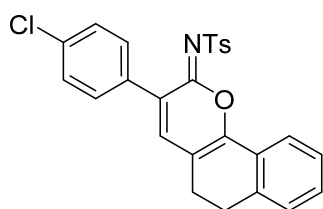

The title compound was prepared according to the general procedure to afford **5c** (97.9 mg, 53% yield) as a yellow powder. M.p. 258.5 – 260.2 °C; <sup>1</sup>H NMR (400 MHz, CDCl<sub>3</sub>) δ 8.15 (d, *J* = 7.3 Hz, 1H), 7.90 (d, *J* = 8.2 Hz, 2H), 7.56 (d, *J* = 8.5 Hz, 2H), 7.46 – 7.31 (m, 5H), 7.29 – 7.18 (m, 3H), 2.97 (t, *J* = 7.8 Hz, 2H), 2.78 (t, *J* = 7.8 Hz, 2H), 2.39 (s, 3H); <sup>13</sup>C NMR (100 MHz, CDCl<sub>3</sub>) δ 158.3, 155.0, 142.6, 142.4, 139.9, 137.1, 134.7, 132.9, 131.1, 130.1, 129.2, 128.4, 127.9, 126.8, 126.5, 124.4, 114.8, 27.2, 24.6, 21.5 ppm; IR (KBr) ν 3055, 2953, 2850, 2833, 1639, 1444, 1291, 1141 cm<sup>-1</sup>; HRMS (ESI) *m/z* calcd for C<sub>26</sub>H<sub>21</sub>ClNO<sub>3</sub>S [M+H]<sup>+</sup> = 462.0925, found = 462.0932.

4-methyl-N-(3-phenyl-6,7-dihydrocyclopenta[b]pyran-2(5H)-ylidene)benzenesulfonamide **5d**

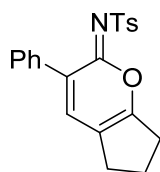

The title compound was prepared according to the general procedure to afford **5d** (67.2 mg, 46% yield) as a yellow powder. M.p. 194.9 – 197.8 °C; <sup>1</sup>H NMR (400 MHz, CDCl<sub>3</sub>) δ 7.87 (d, *J* = 8.1 Hz, 2H), 7.51 (d, *J* = 7.2 Hz, 2H), 7.35 – 7.30 (m, 4H), 7.22 (d, *J* = 8.0 Hz, 2H), 2.85 (t, *J* = 7.6 Hz, 2H), 2.69 (t, *J* = 7.1 Hz, 2H), 2.37 (s, 3H), 2.20 – 2.05 (m, 2H); <sup>13</sup>C NMR (100 MHz, CDCl<sub>3</sub>) δ 163.4, 160.2, 142.6, 140.3, 139.6, 134.9, 129.0, 128.9, 128.5, 128.2, 127.3, 119.9, 30.4, 27.8, 21.5, 20.7 ppm; IR (KBr) ν 3033, 2958, 2865, 2840, 1649, 1446, 1291, 1149 cm<sup>-1</sup>; HRMS (ESI) *m/z*

calcd for  $C_{21}H_{20}NO_3S$   $[M+H]^+ = 366.1158$ , found = 366.1163.

#### **D. Gram scale synthesis of inminolactones 4b and 5b**

To a flame dried round bottle flask with a magnetic stirring bar were added CuI (76 mg, 0.4 mmol, 10 mol %),  $PPh_3$  (21.0 mg, 0.8 mmol, 20 mol %) and enaminone **1b** (4 mmol, 701 mg) or **1n** (4 mmol, 805 mg), followed by the addition of 1,2-dichloroethane (20 mL) and TEA (0.28 mL, 0.2 mmol, 0.5 equiv.) under nitrogen atmosphere at room temperature. Phenylacetylene **2a** (10 mmol, 1.1 mL, 2.5 equiv.) and p-toluenesulfonyl azide **3a** (10 mmol, 1.97g, 2.5 equiv.) was then added, and the resulting mixture was stirred overnight. After the completely consumption of enaminone **1** monitored by TLC, the solvent was removed under reduced pressure and the residue was purified by column chromatography on silica gel with PE/Ea = 5:1 as eluent to afford yellow solid **4b** (1.24g, 77% yield) or **5b** (1.21g, 71% yield).

#### **E. Transformation of 4a and 5b**

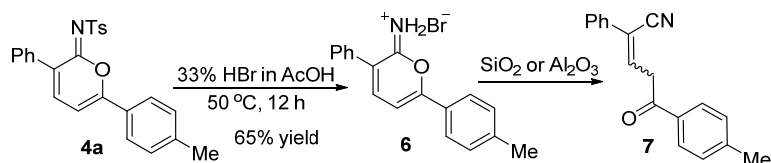

To the seal tube was added **4a** (1.2 mmol, 498.6 mg), followed by adding 5 mL 33% HBr in AcOH. The mixture was stirred at 50 °C and the solid was dissolved. Yellow solid was precipitated after overnight. The solid was filtered, washed by water and recrystallized by DCM to get pure **6** (266.9 mg, 65% yield) as a yellow powder. M.p. 198.5 – 201.1 °C; <sup>1</sup>H NMR (400 MHz, DMSO) δ 10.83 (s, 1H), 9.76 (s, 1H), 8.04 – 7.97 (m, 3H), 7.69 (d, J = 7.7 Hz, 1H), 7.61 – 7.52 (m, 5H), 7.45 (d, J = 8.1 Hz, 2H), 2.42 (s, 3H); <sup>13</sup>C NMR (100 MHz, DMSO) δ 166.3, 158.3, 147.0, 143.2, 132.4, 130.5, 130.1, 129.8, 129.2, 126.7, 126.4, 122.8, 106.0, 21.6; IR (KBr) ν 3425, 3315, 2920, 2855, 1651, 1446, 1314, 1191 cm<sup>-1</sup>; HRMS (ESI) m/z calcd for C<sub>18</sub>H<sub>16</sub>NO [M-Br]<sup>+</sup> = 262.1226, found = 262.1237. During our purification of compound **6**, we found compound **6** was easily decomposed to compound **7** as a pale yellow solid. M.p. 87.2 – 90.6 °C; <sup>1</sup>H NMR (400 MHz, CDCl<sub>3</sub>) δ 7.94 (d, J = 8.1 Hz, 2H), 7.61 (d, J = 7.0 Hz, 2H), 7.45 – 7.37 (m, 3H), 7.34 – 7.27 (m, 3H), 4.29 (d, J = 7.0 Hz, 2H), 2.44 (s, 3H); <sup>13</sup>C NMR (100 MHz, CDCl<sub>3</sub>) δ 194.8, 144.9, 138.9, 133.5, 132.7, 129.6, 129.4, 129.0, 128.4, 125.9, 118.3, 116.4, 40.9, 21.7; IR (KBr) ν 3445, 3050, 3035, 2863, 2226, 1686,

1499, 1449  $\text{cm}^{-1}$ ; HRMS (ESI)  $m/z$  calcd for  $\text{C}_{18}\text{H}_{14}\text{NO}$   $[\text{M}-\text{H}]^- = 260.1081$ , found = 260.1077.

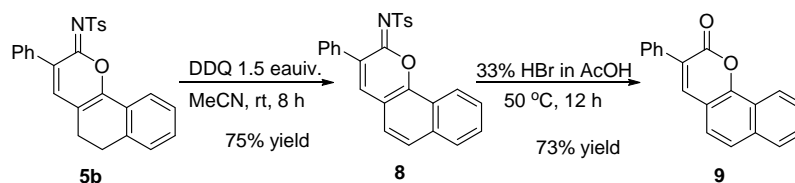

To the solution of **5b** (0.2 mmol, 85.5 mg) in MeCN (2 mL) was added 2,3-dicyano-5,6-dichlorobenzoquinone, DDQ (0.3 mmol, 68.1 mg) at room temperature. After the completely consumption of **5b** monitored by TLC, the solvent was removed under reduced pressure and the residue was purified by column chromatography on silica gel with PE/Ea = 5:1 as eluent to afford yellow solid **8** (63.8 mg, 75% yield). M.p. 88.2 – 91.7 °C;  $^1\text{H}$  NMR (400 MHz,  $\text{CDCl}_3$ )  $\delta$  8.89 (d,  $J = 8.2$  Hz, 1H), 8.00 (d,  $J = 8.1$  Hz, 2H), 7.93 (d,  $J = 8.2$  Hz, 1H), 7.91 (s, 1H), 7.83 – 7.67 (m, 5H), 7.55 (d,  $J = 8.5$  Hz, 1H), 7.48 – 7.42 (m, 3H), 7.32 (d,  $J = 7.9$  Hz, 2H), 2.44 (s, 3H);  $^{13}\text{C}$  NMR (100 MHz,  $\text{CDCl}_3$ )  $\delta$  157.7, 149.9, 142.7, 140.4, 139.8, 134.8, 134.5, 129.4, 129.2, 129.0, 128.9, 128.2, 128.1, 127.7, 126.6, 125.8, 123.3, 123.0, 122.8, 115.6, 21.5 ppm; IR (KBr)  $\nu$  3065, 3033, 2963, 2853, 1821, 1686, 1459, 1311  $\text{cm}^{-1}$ ; HRMS (ESI)  $m/z$  calcd for  $\text{C}_{26}\text{H}_{20}\text{NO}_3\text{S}$   $[\text{M}+\text{H}]^+ = 426.1158$ , found = 426.1171.

To the seal tube was added **8** (0.6 mmol, 255.3 mg), followed by adding 3 mL 33% HBr in AcOH. The mixture was stirred at 50 °C and the solid was dissolved. After the completely consumption of **8** monitored by TLC, the mixture was diluted by 20 mL water and extracted by DCM (2  $\times$  20 mL). The combined organic phase was washed by water, dried by  $\text{Na}_2\text{SO}_4$ , filtered and concentrated under reduced pressure and the residue was purified by column chromatography on silica gel with PE/Ea = 5:1 as eluent to afford white powder **9** (119.2 mg, 73% yield). M.p. 174.2 – 176.6 °C;  $^1\text{H}$  NMR (400 MHz,  $\text{CDCl}_3$ )  $\delta$  8.53 (d,  $J = 7.9$  Hz, 1H), 8.20 (d,  $J = 8.1$  Hz, 1H), 7.88 – 7.61 (m, 7H), 7.56 – 7.36 (m, 3H);  $^{13}\text{C}$  NMR (100 MHz,  $\text{CDCl}_3$ )  $\delta$  160.0, 149.9, 139.1, 134.4, 132.5, 129.7, 129.1, 128.6, 128.5, 128.4, 128.0, 127.4, 126.9, 123.8, 122.7, 118.0, 115.7 ppm; IR (KBr)  $\nu$  3417, 3065, 3000, 2855, 1726, 1636, 1509, 1449  $\text{cm}^{-1}$ ; HRMS (ESI)  $m/z$  calcd for  $\text{C}_{19}\text{H}_{13}\text{O}_2$   $[\text{M}+\text{H}]^+ = 273.0910$ , found = 273.0922.

## F. X-Ray crystallographic analysis of 4b

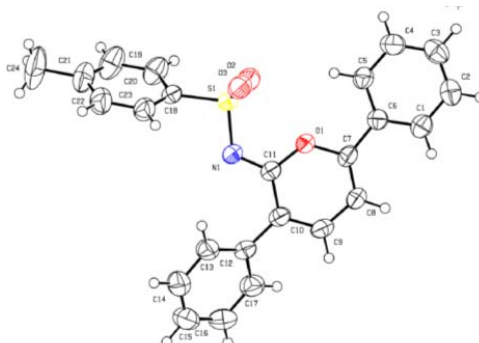

Figure 1. X-ray structure of **4b**

Table 1. Crystal data and structure refinement for **4b**

|                                 |                                                    |              |
|---------------------------------|----------------------------------------------------|--------------|
| Empirical formula               | C <sub>24</sub> H <sub>19</sub> N O <sub>3</sub> S |              |
| Formula weight                  | 401.46                                             |              |
| Temperature                     | 293K                                               |              |
| Wavelength                      | 0.71073 Å                                          |              |
| Crystal system                  | monoclinic                                         |              |
| Space group                     | P 1 21/c 1                                         |              |
| Unit cell dimensions            | a = 16.2229(11) Å                                  | α = 90°.     |
|                                 | b = 10.6431(5) Å                                   | β = 98.650°. |
|                                 | c = 12.0294(7) Å                                   | γ = 90°.     |
| Volume                          | 2053.4(2) Å <sup>3</sup>                           |              |
| Z                               | 4                                                  |              |
| Density (calculated)            | 1.299 Mg/m <sup>3</sup>                            |              |
| Absorption coefficient          | 0.183 mm <sup>-1</sup>                             |              |
| F(000)                          | 840                                                |              |
| Crystal size                    | 0.42 x 0.28 x 0.13 mm <sup>3</sup>                 |              |
| Theta range for data collection | 2.977 to 25.347°.                                  |              |
| Index ranges                    | -19 ≤ h ≤ 19, -12 ≤ k ≤ 12, -14 ≤ l ≤ 9            |              |



|                                   |                                             |
|-----------------------------------|---------------------------------------------|
| Reflections collected             | 7994                                        |
| Independent reflections           | 3759 [R(int) = 0.0344]                      |
| Completeness to theta = 25.242°   | 99.8 %                                      |
| Absorption correction             | Semi-empirical from equivalents             |
| Max. and min. transmission        | 1.00000 and 0.86145                         |
| Refinement method                 | Full-matrix least-squares on F <sup>2</sup> |
| Data / restraints / parameters    | 3759 / 0 / 263                              |
| Goodness-of-fit on F <sup>2</sup> | 1.048                                       |
| Final R indices [I > 2sigma(I)]   | R1 = 0.0494, wR2 = 0.1161                   |
| R indices (all data)              | R1 = 0.0747, wR2 = 0.1381                   |
| Absolute structure parameter      | 0.02(4)                                     |
| Extinction coefficient            | n/a                                         |
| Largest diff. peak and hole       | 0.203 and -0.393 e.Å <sup>-3</sup>          |

## **G. References**

- [1] Jiang, Y.; Zhong, V. Y. K.; Emmanuvel, L.; Park, C.-M. *Chem. Commun.* **2012**, 48, 3133.
- [2] Yadav, M. R.; Rit, K. R.; Sahoo, A. K. *Org. Lett.* **2013**, 15, 1638.

## H. NMR spectra of the products

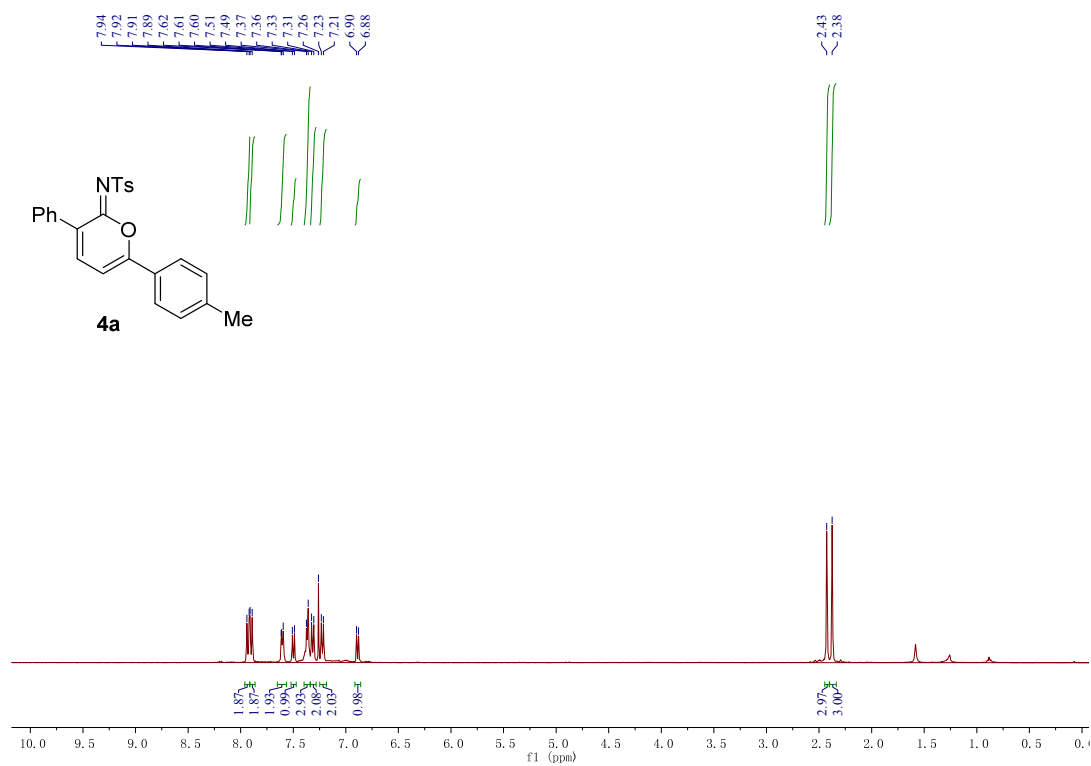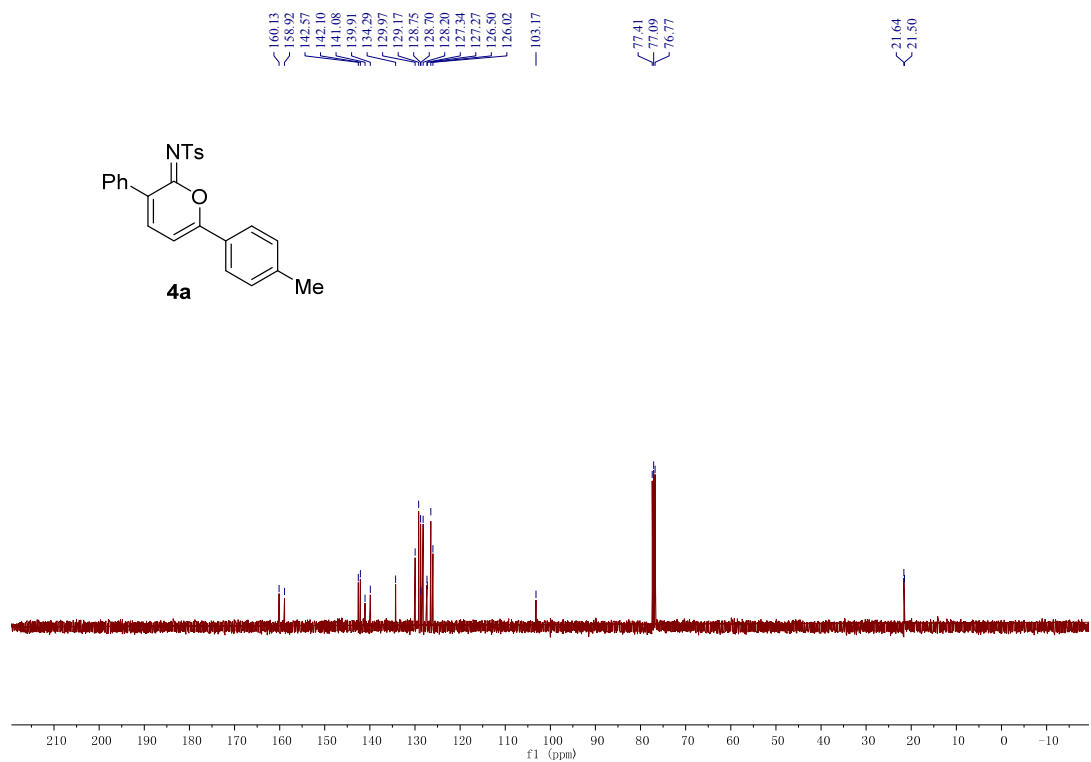

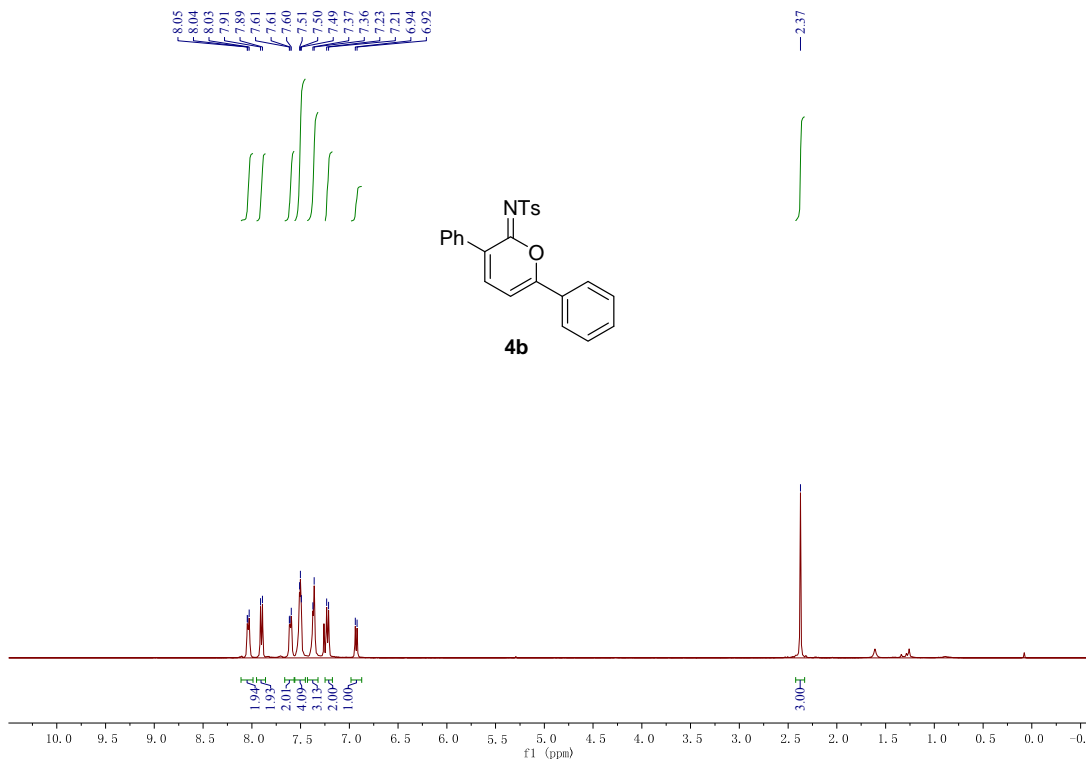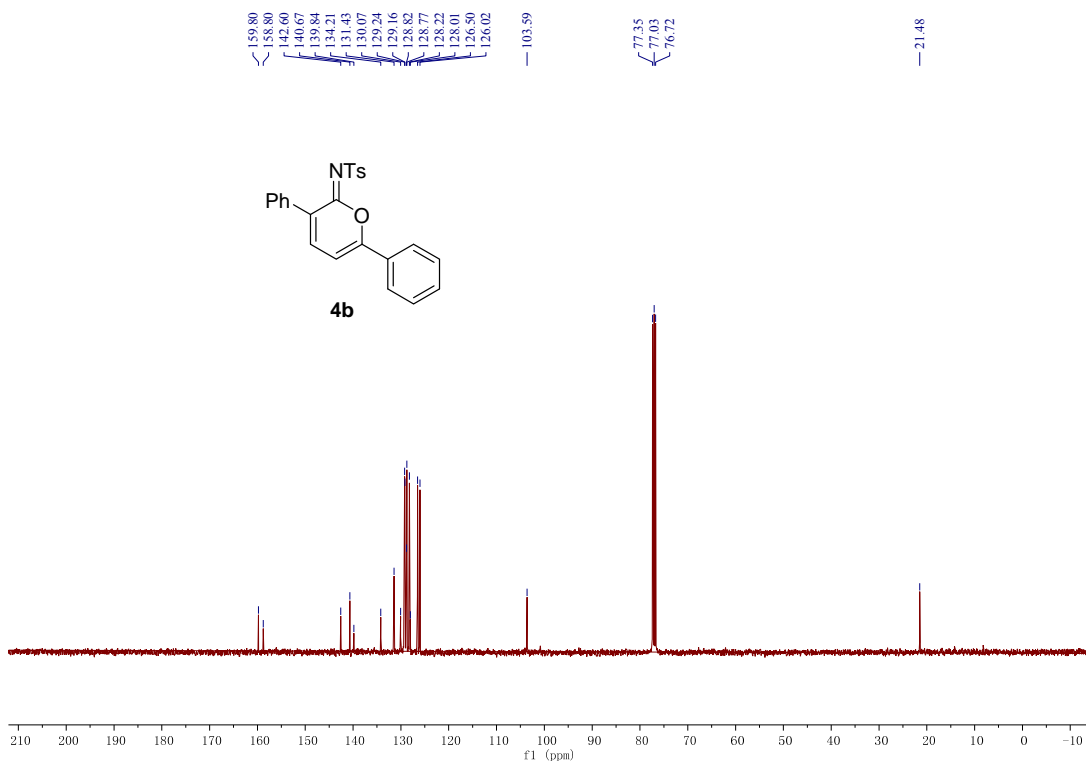

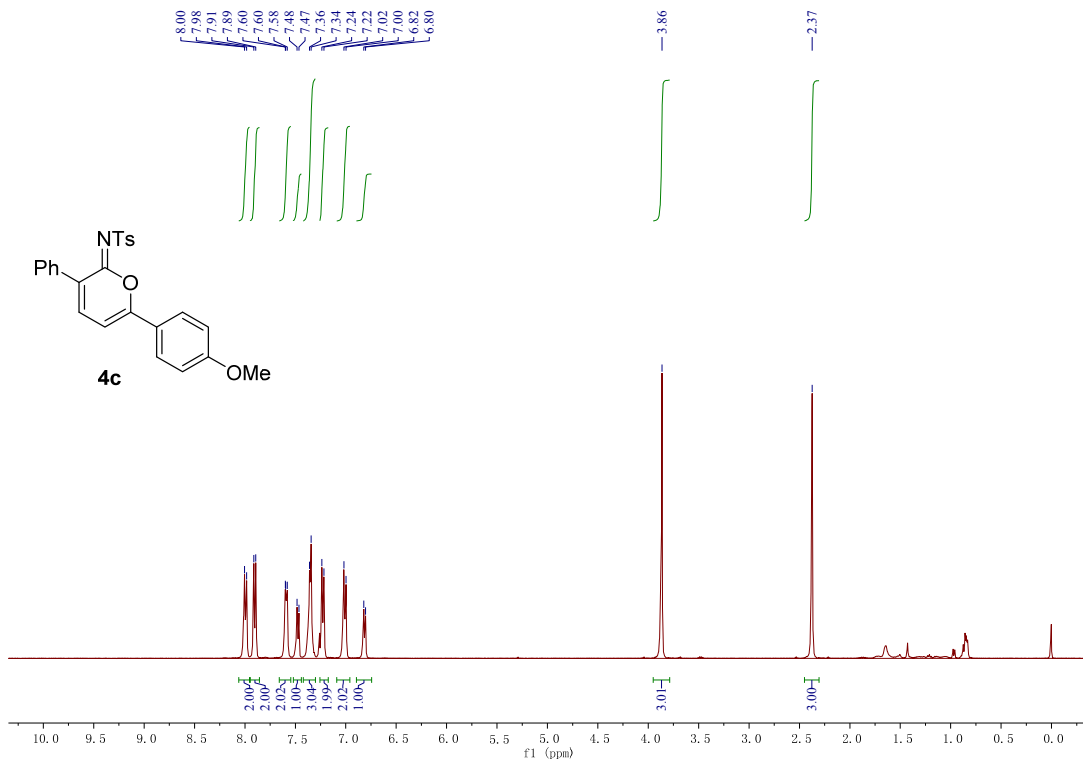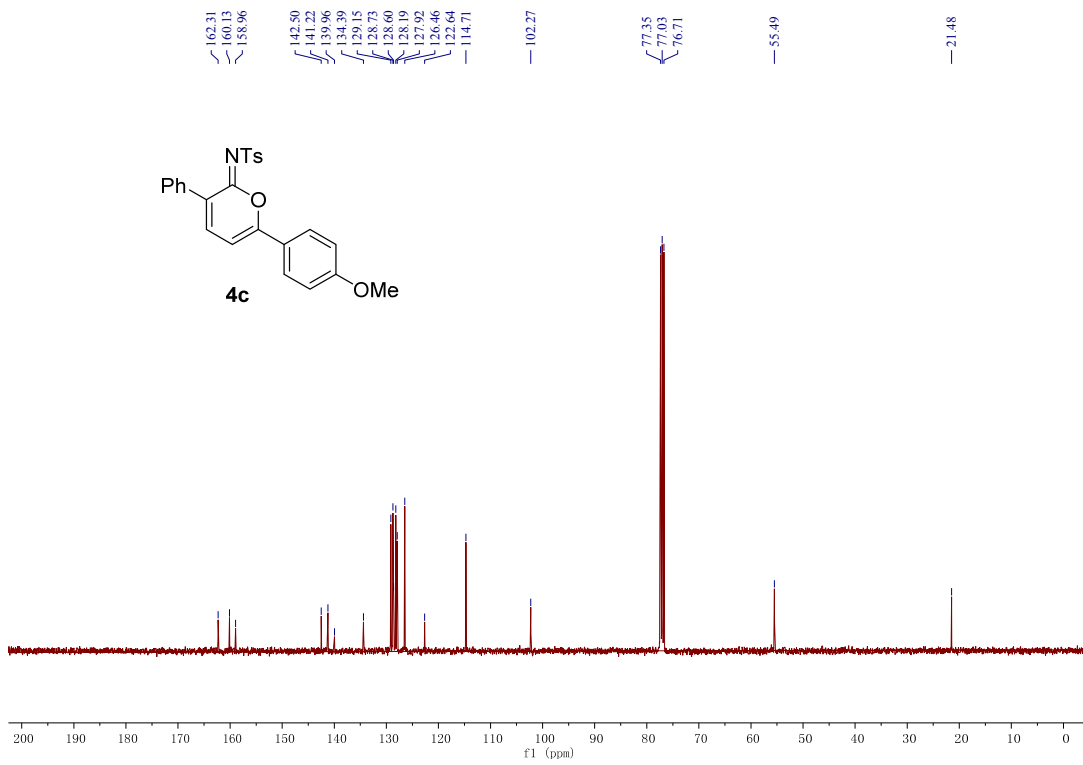

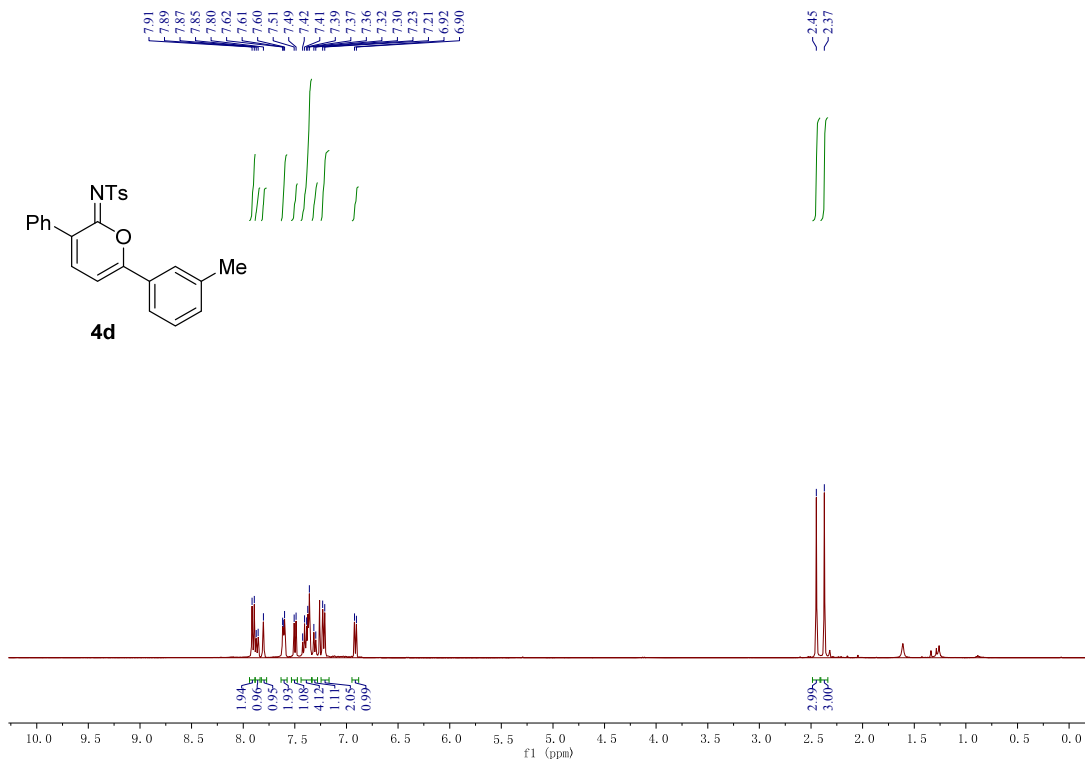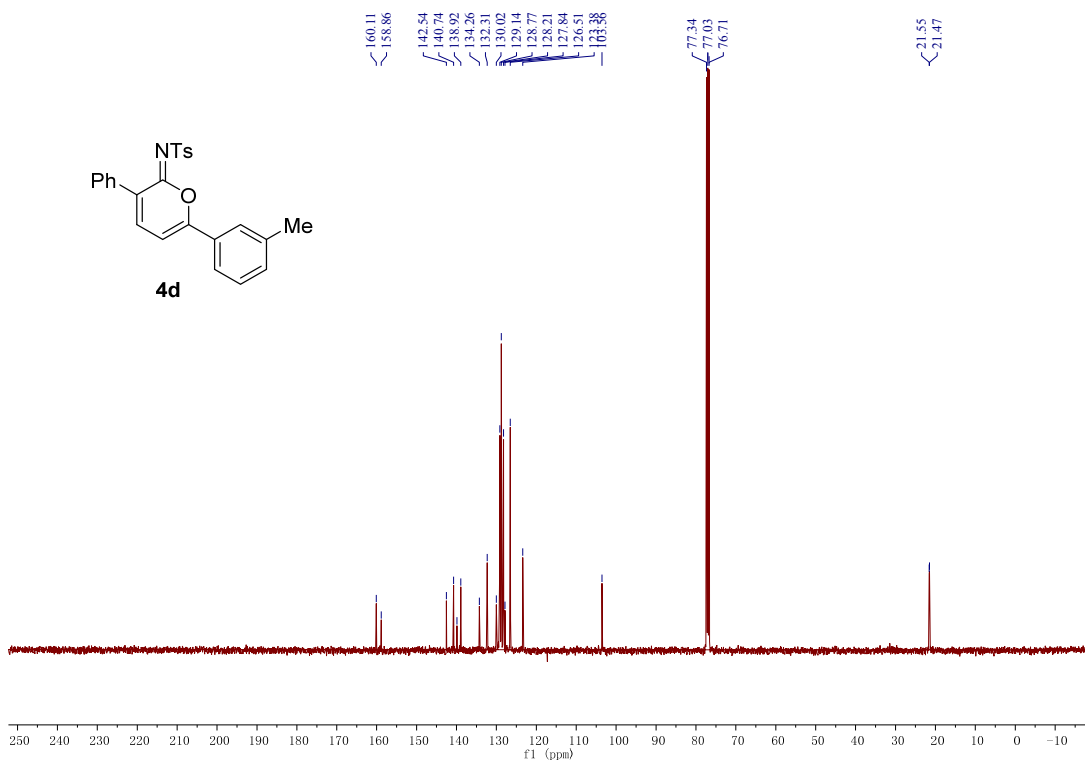

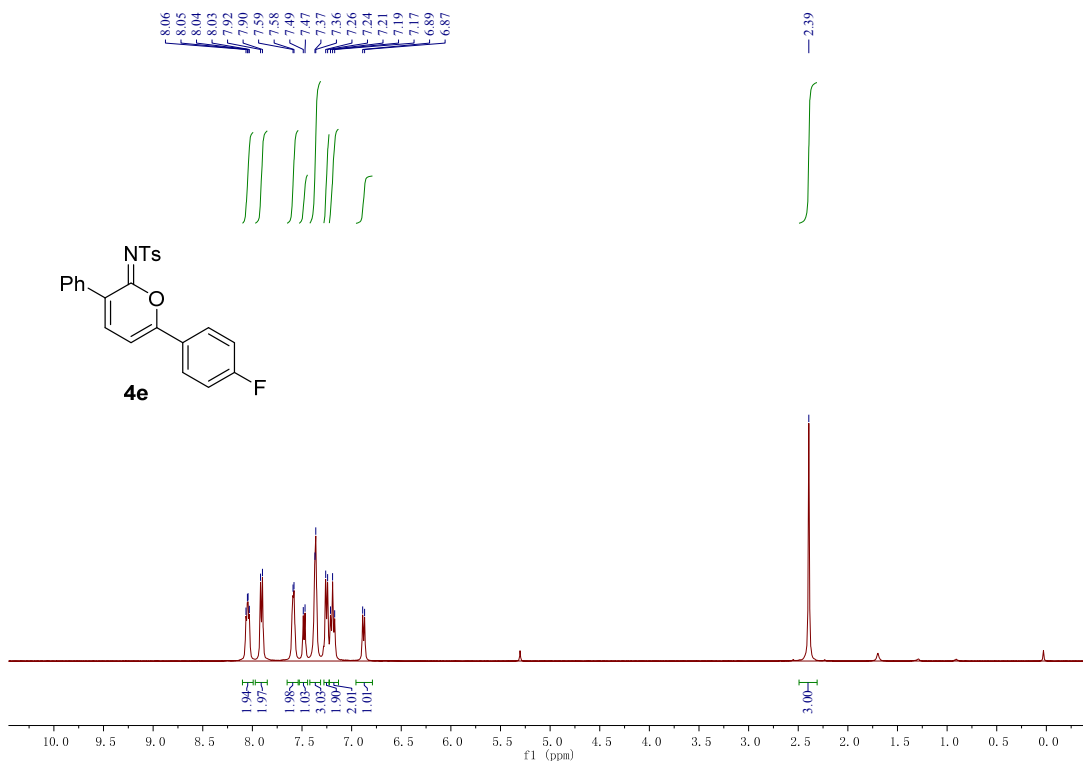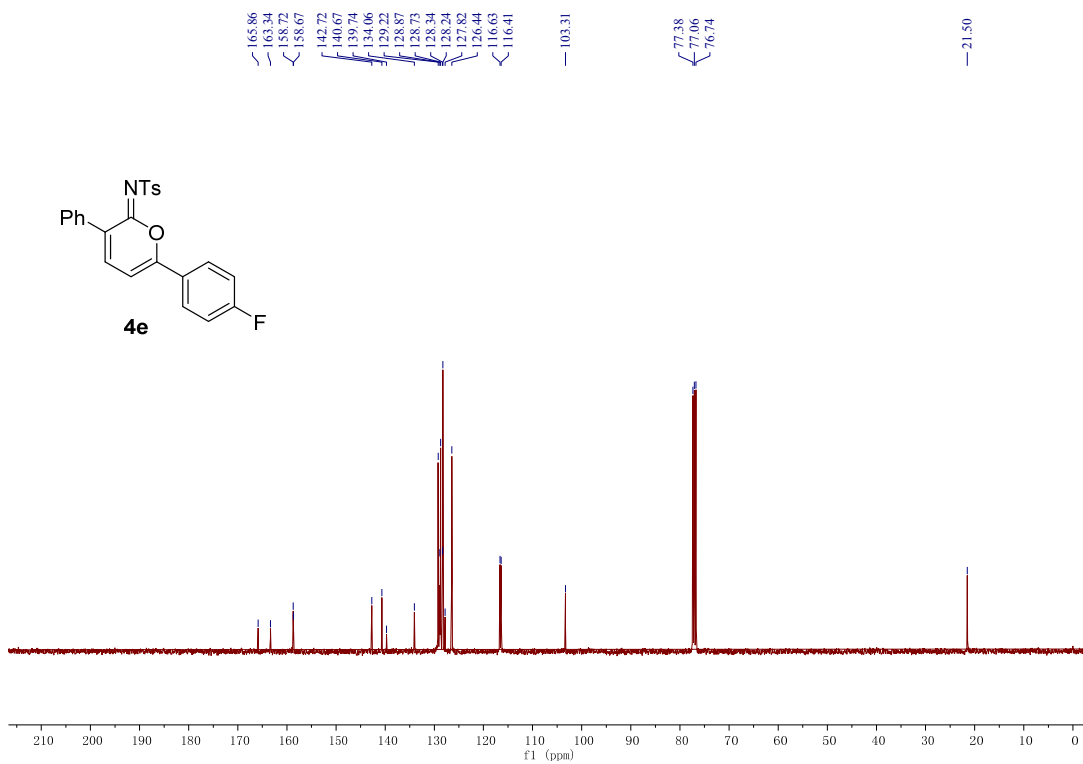

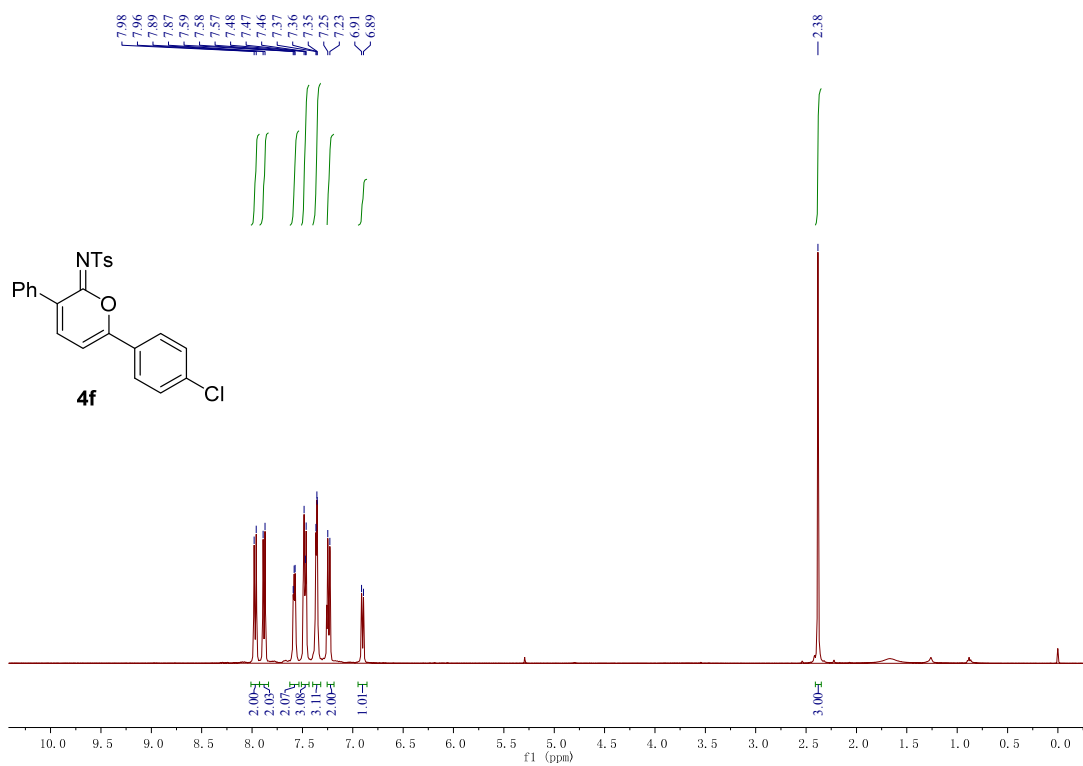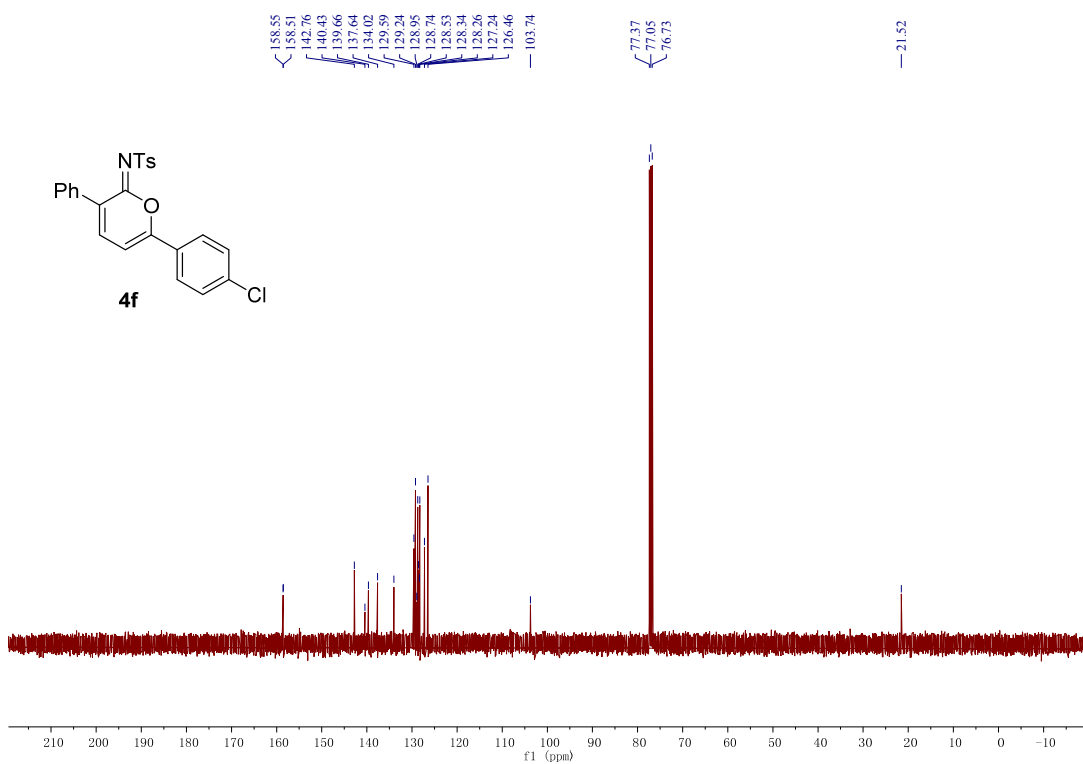

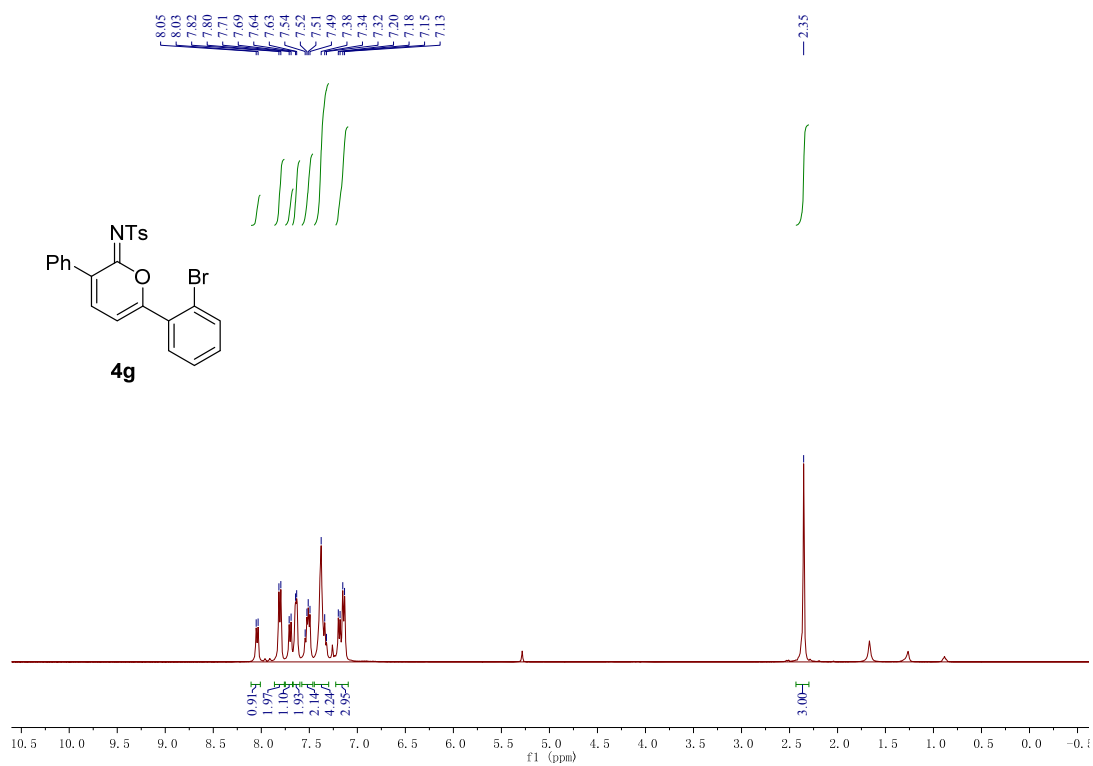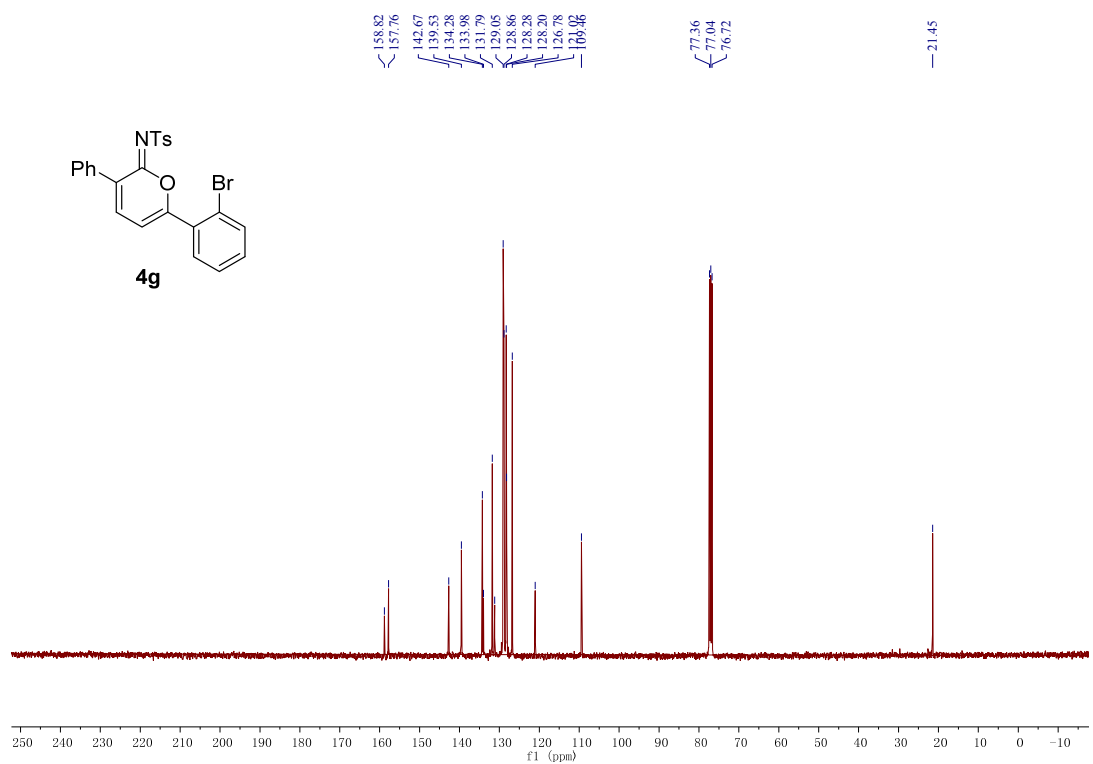



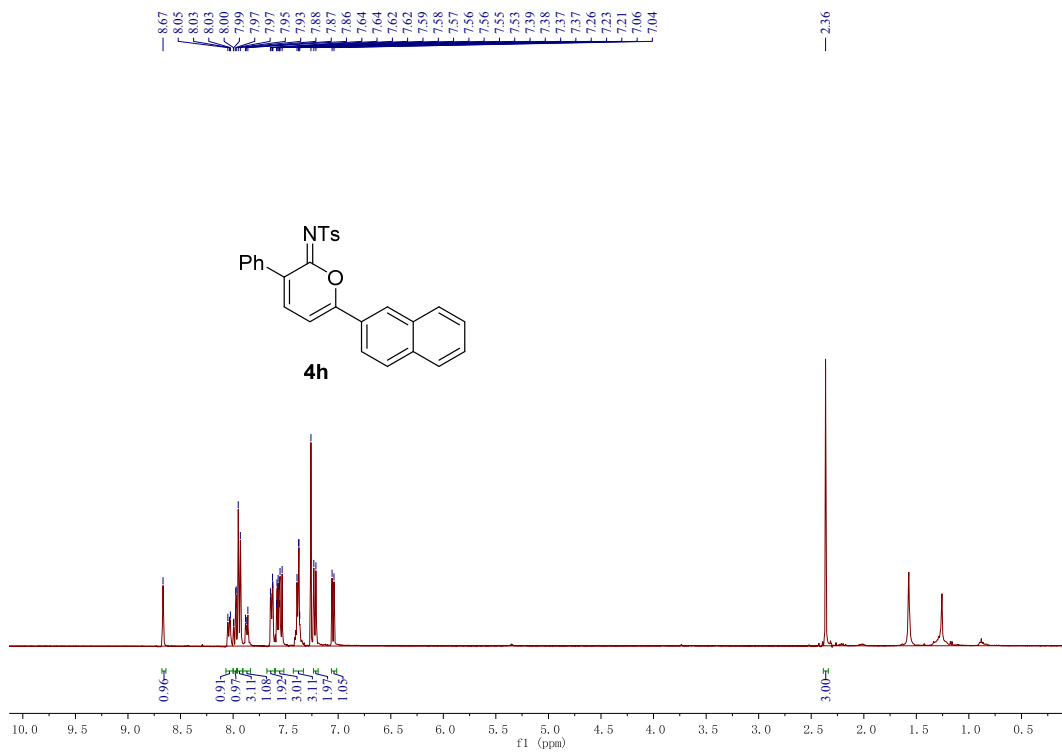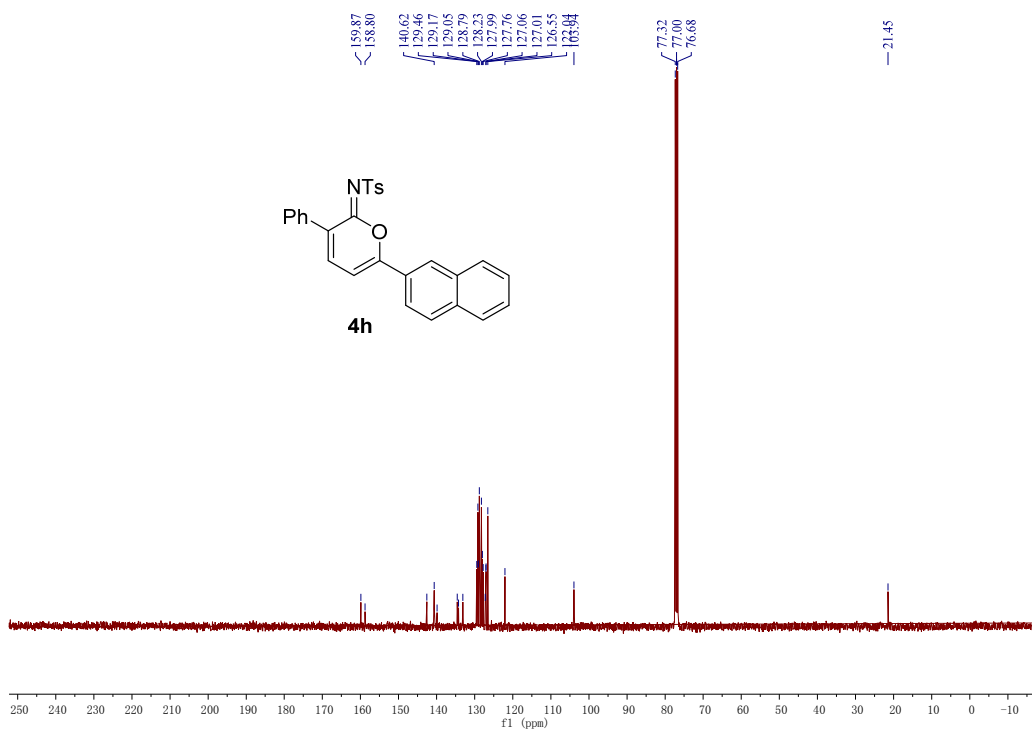

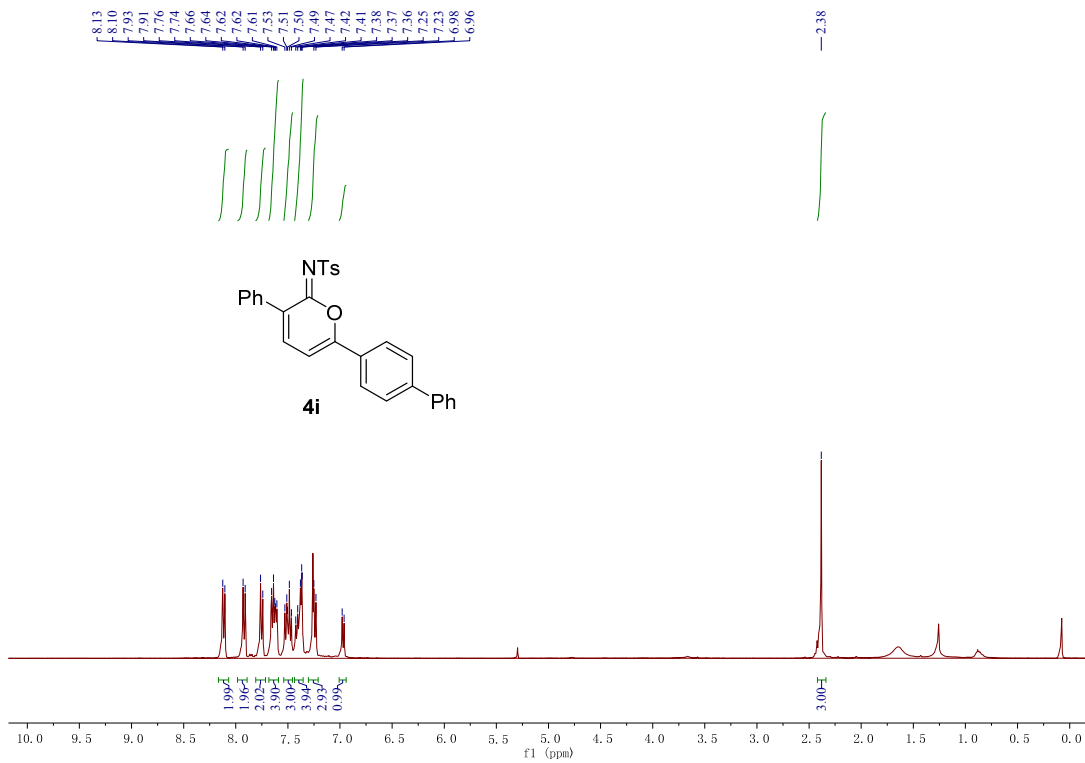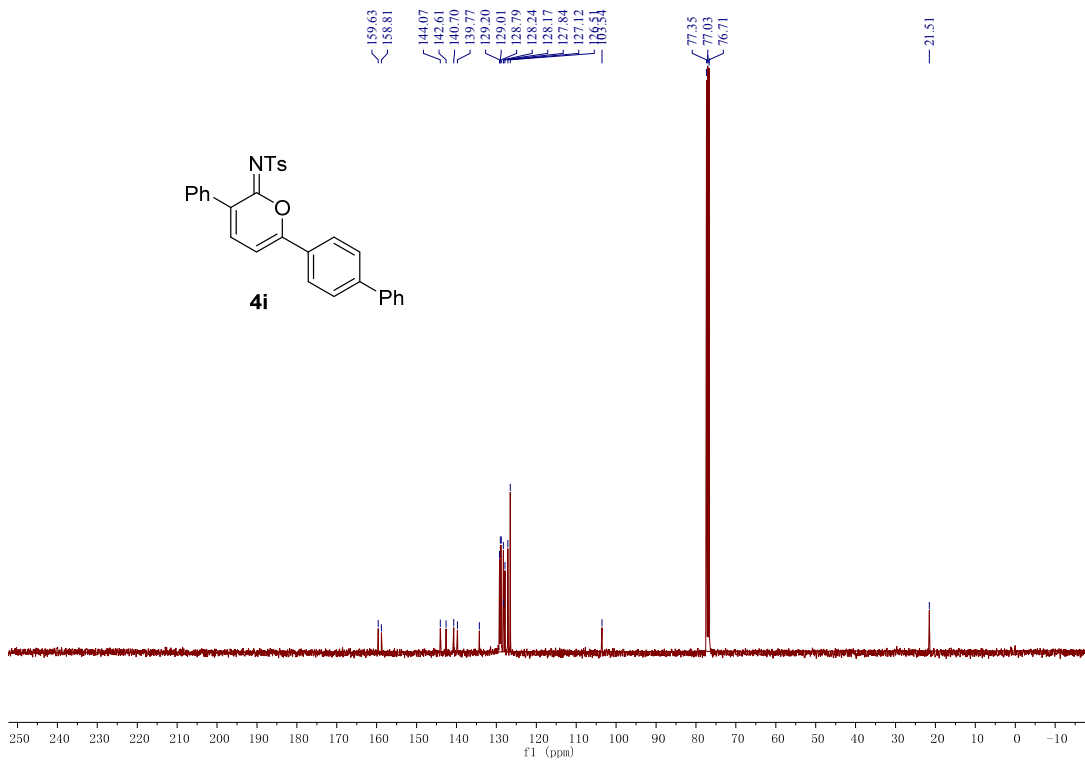

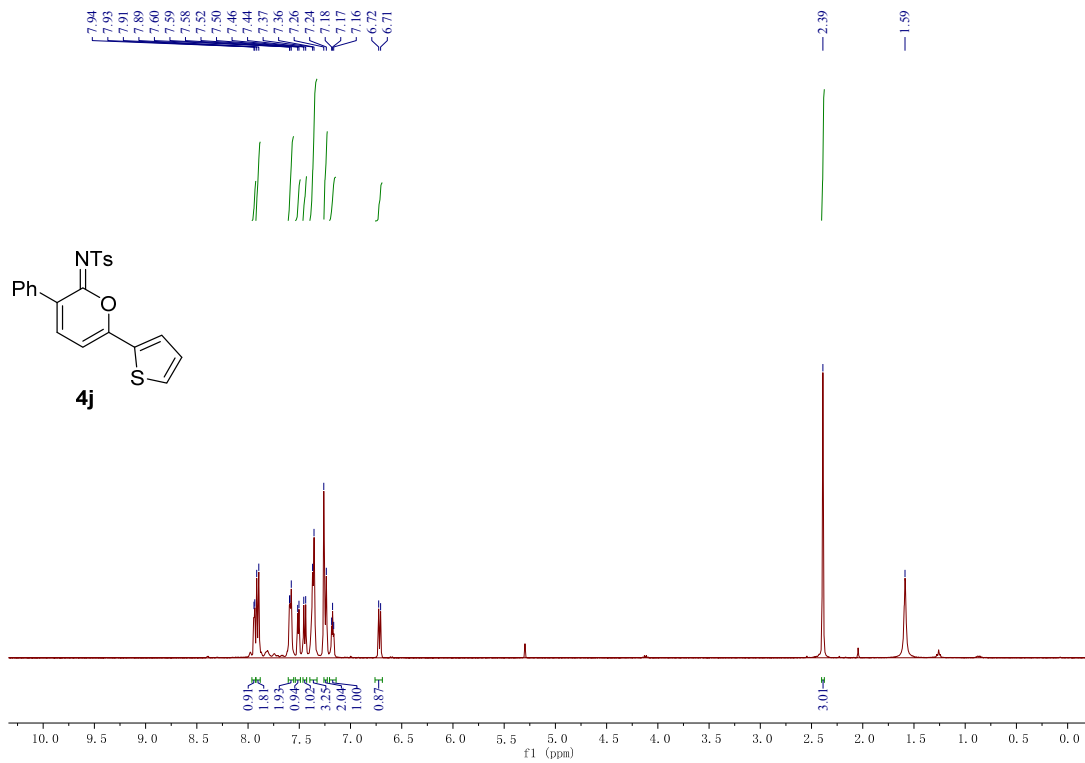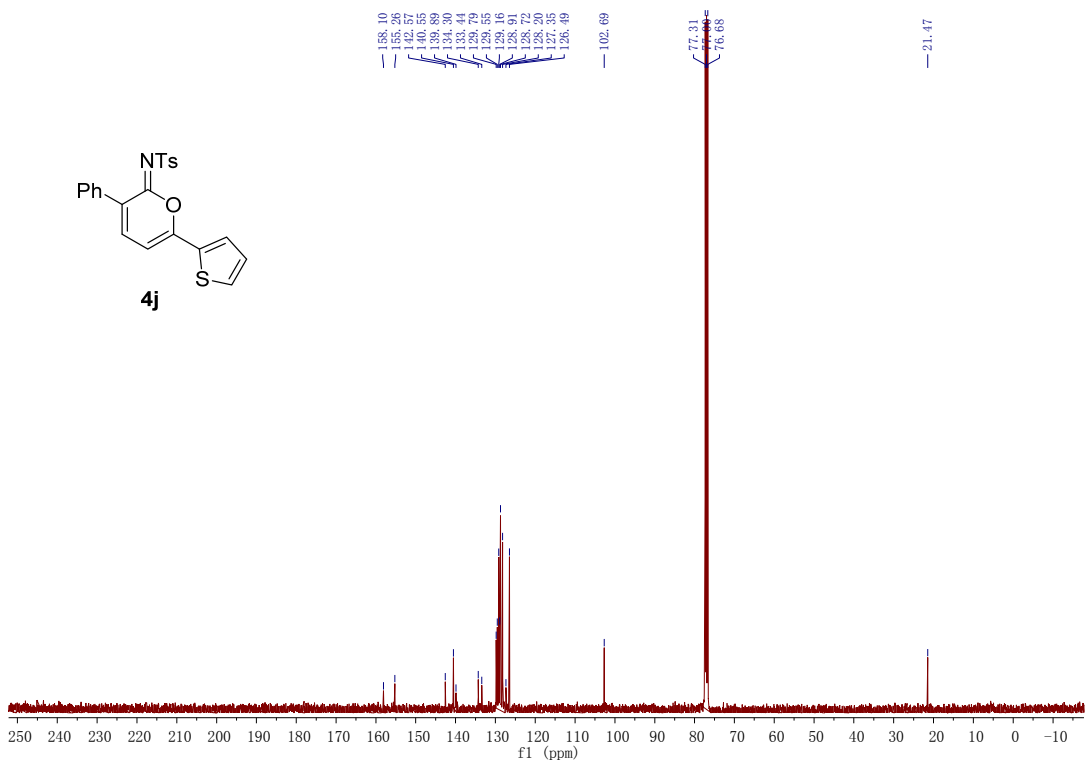

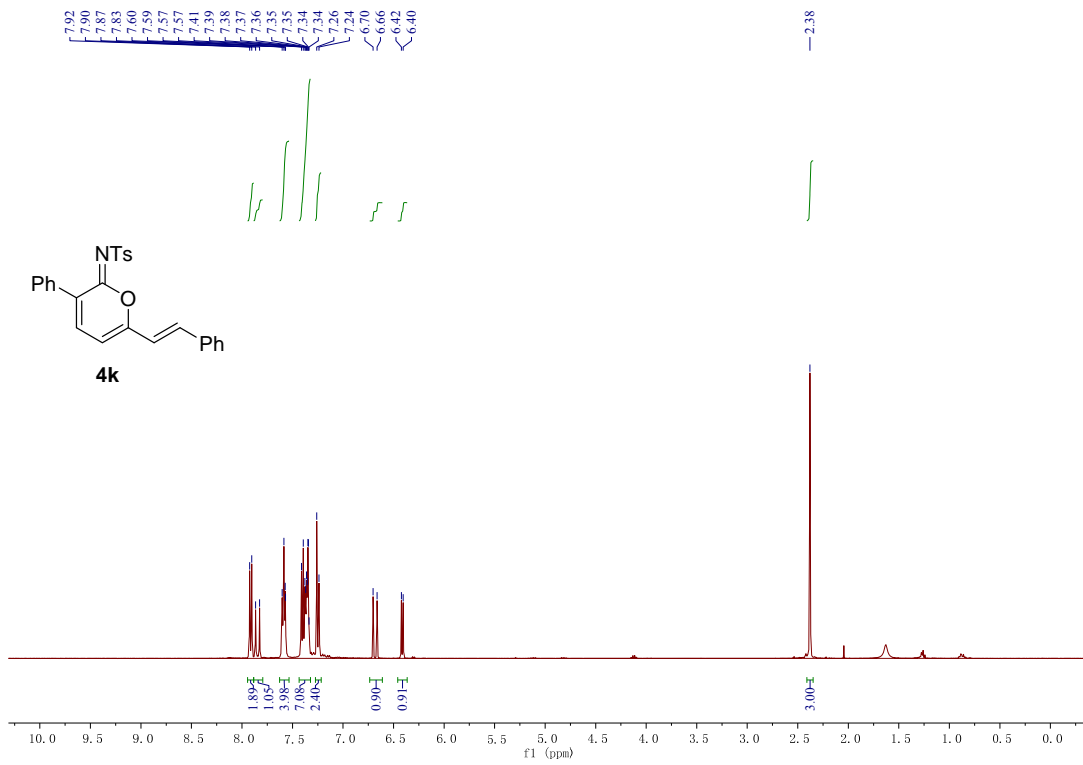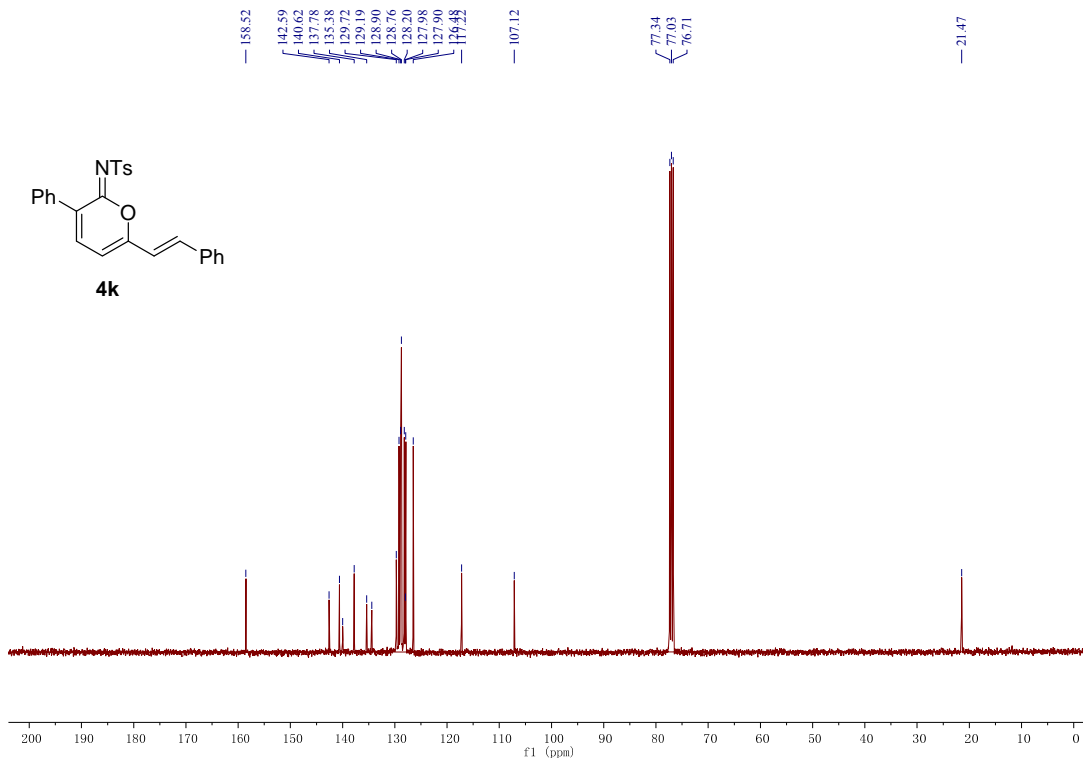

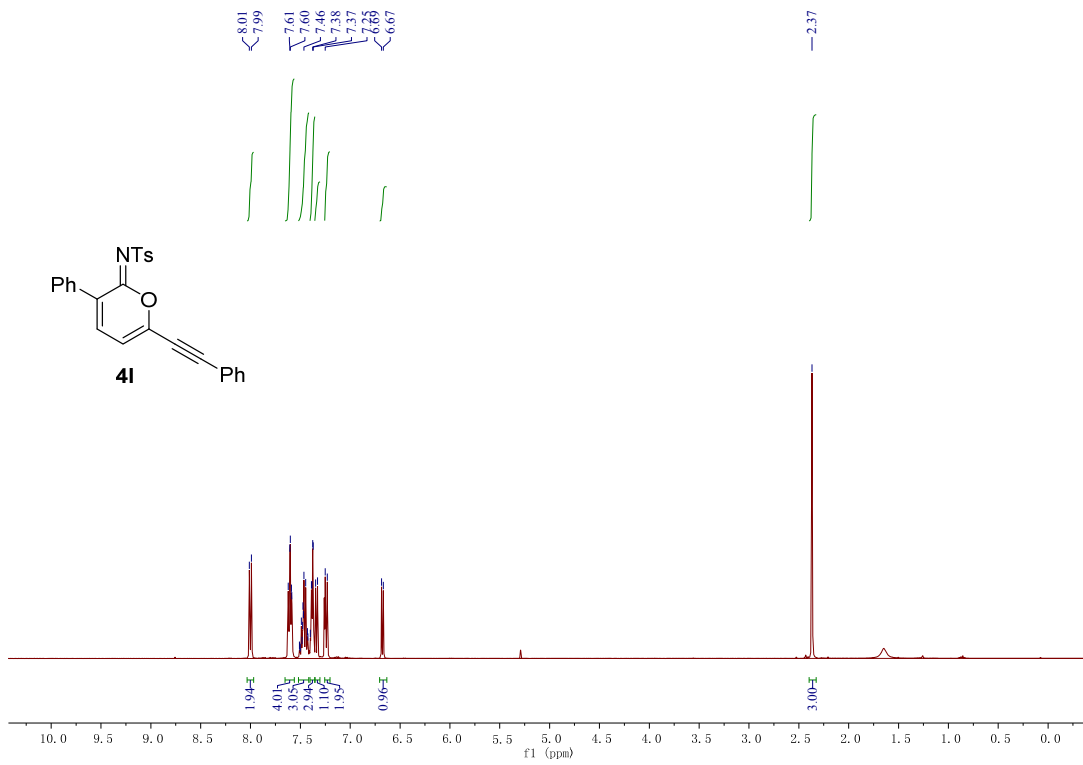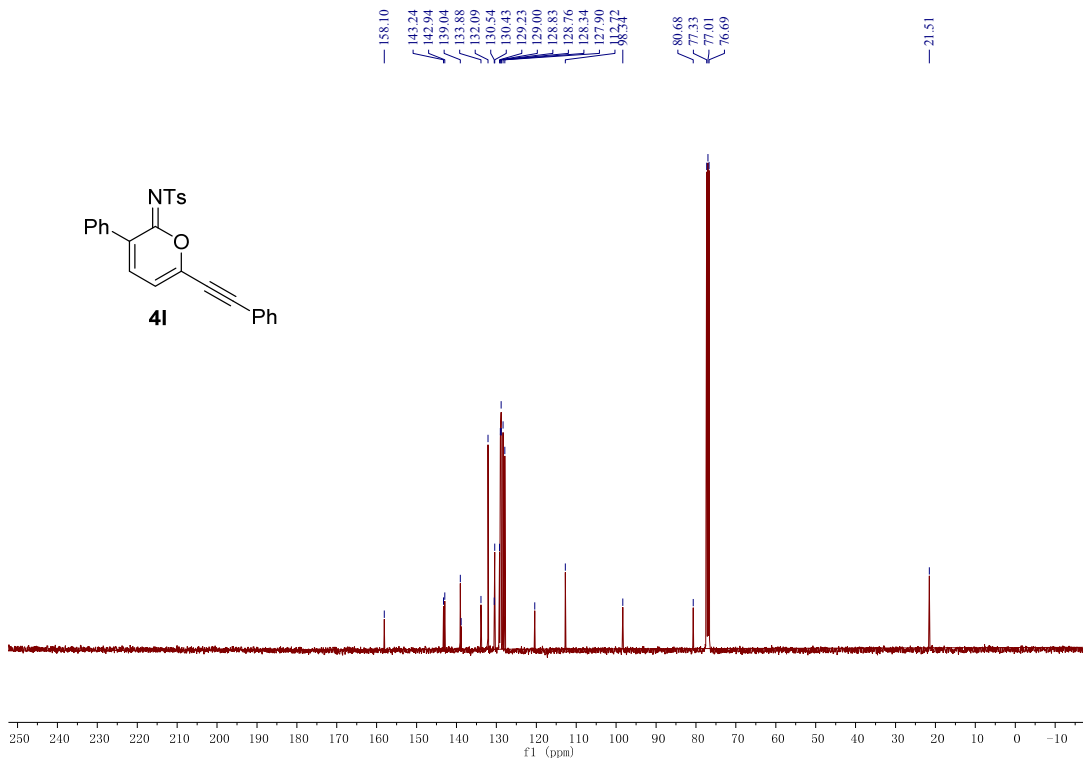

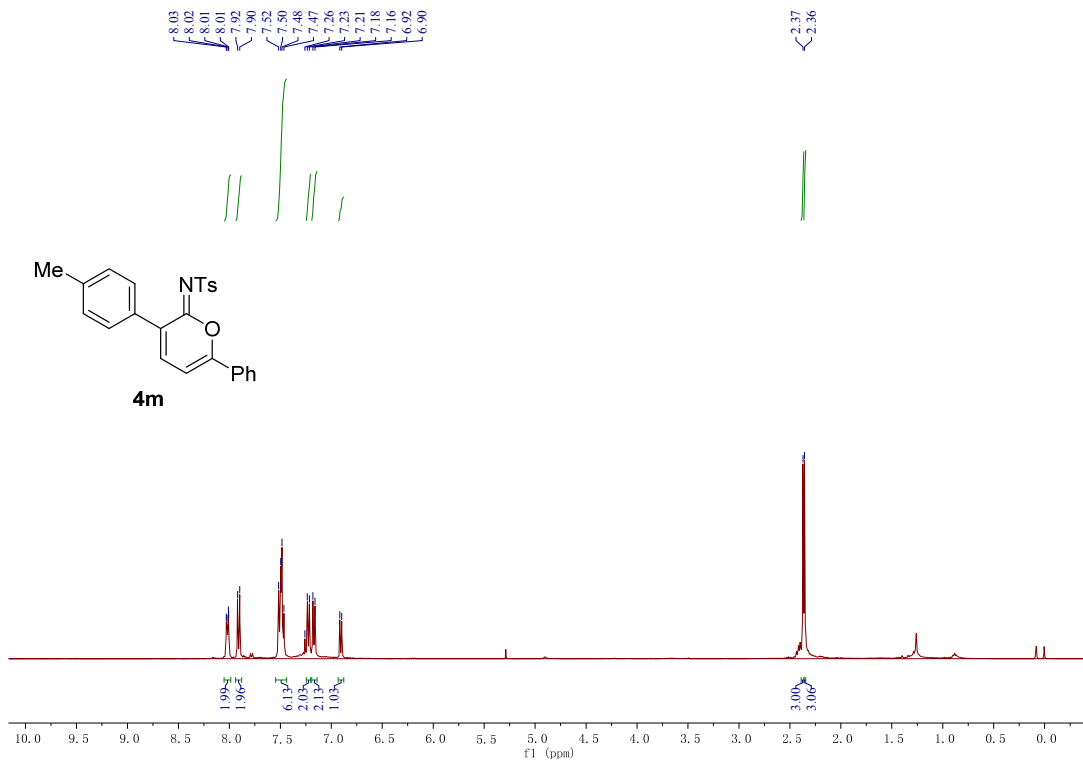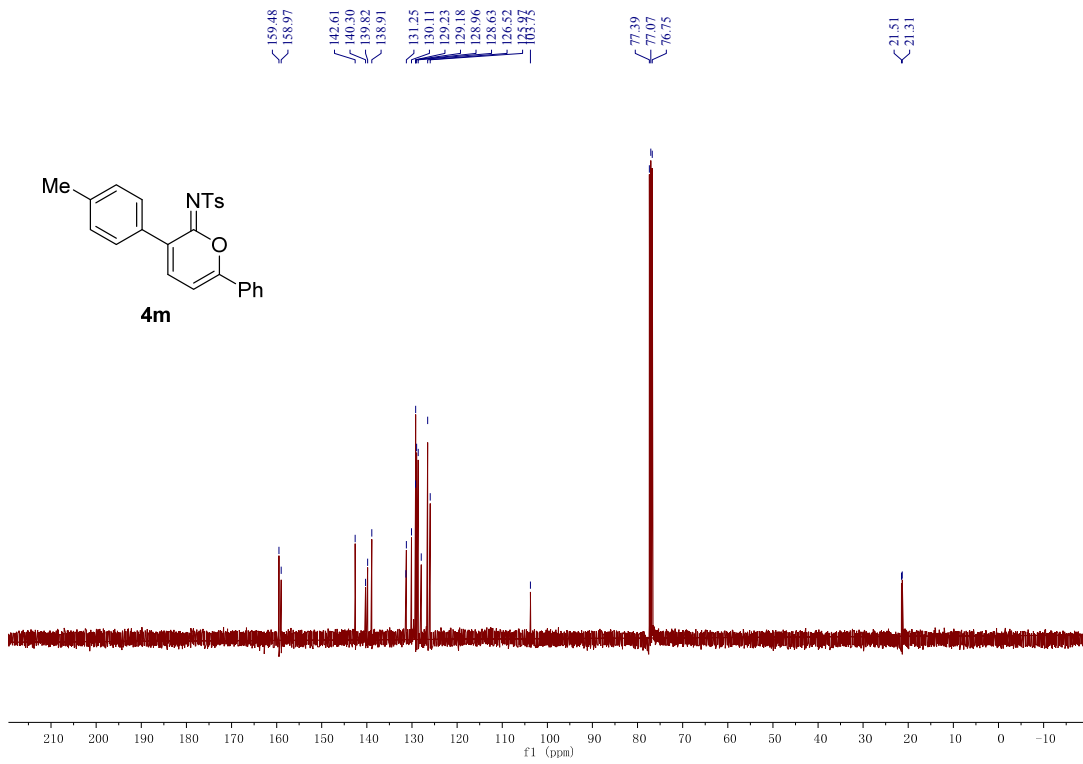

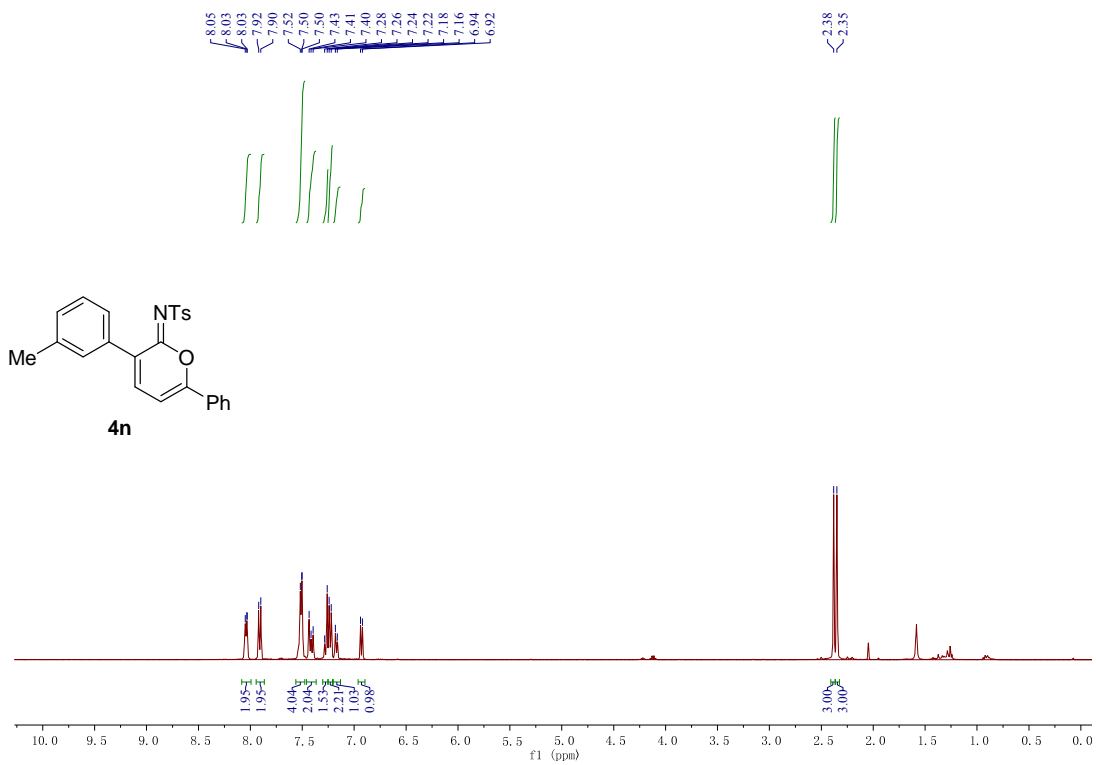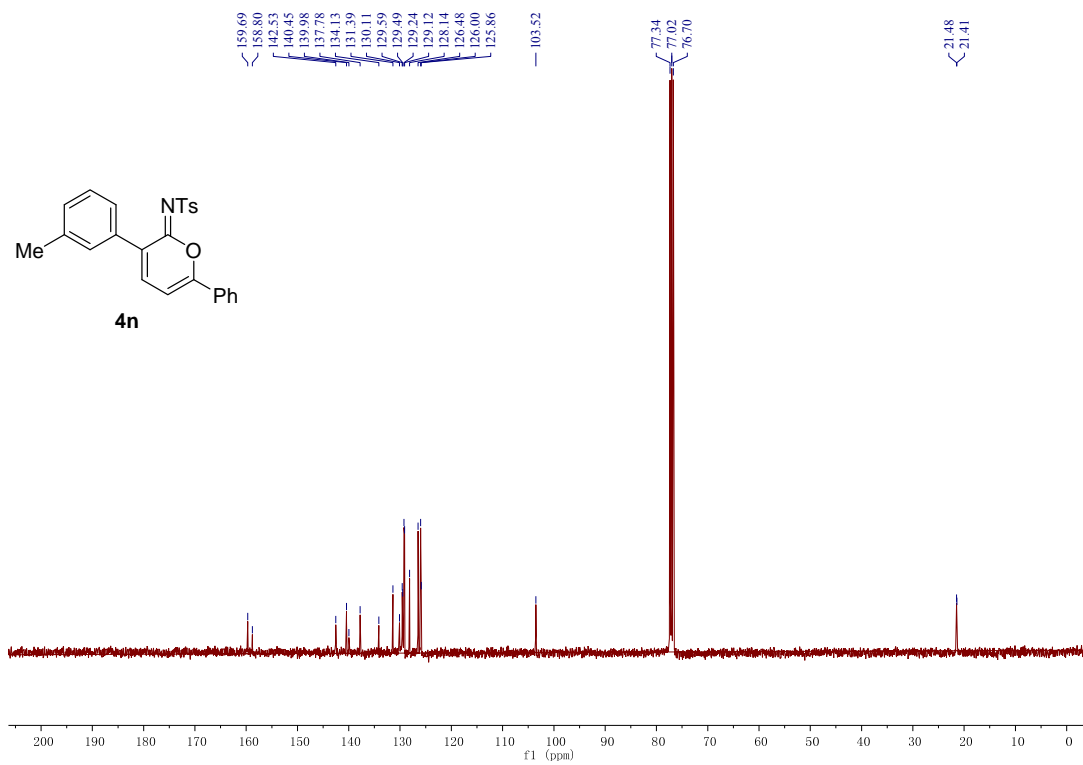

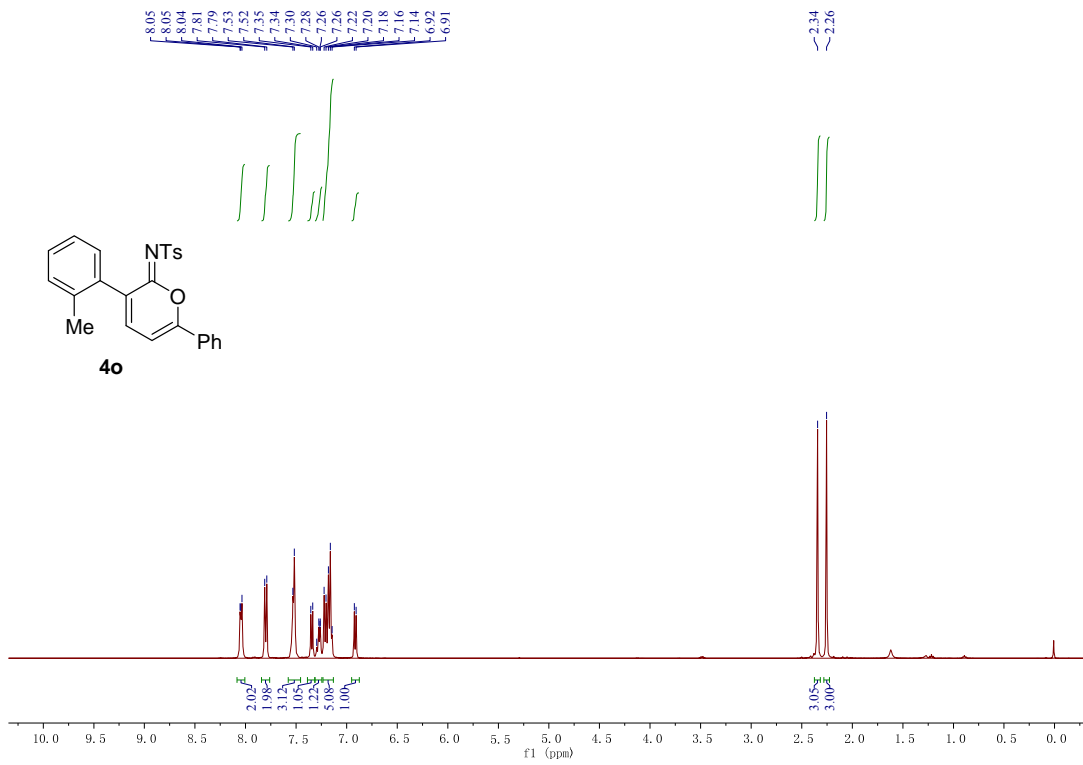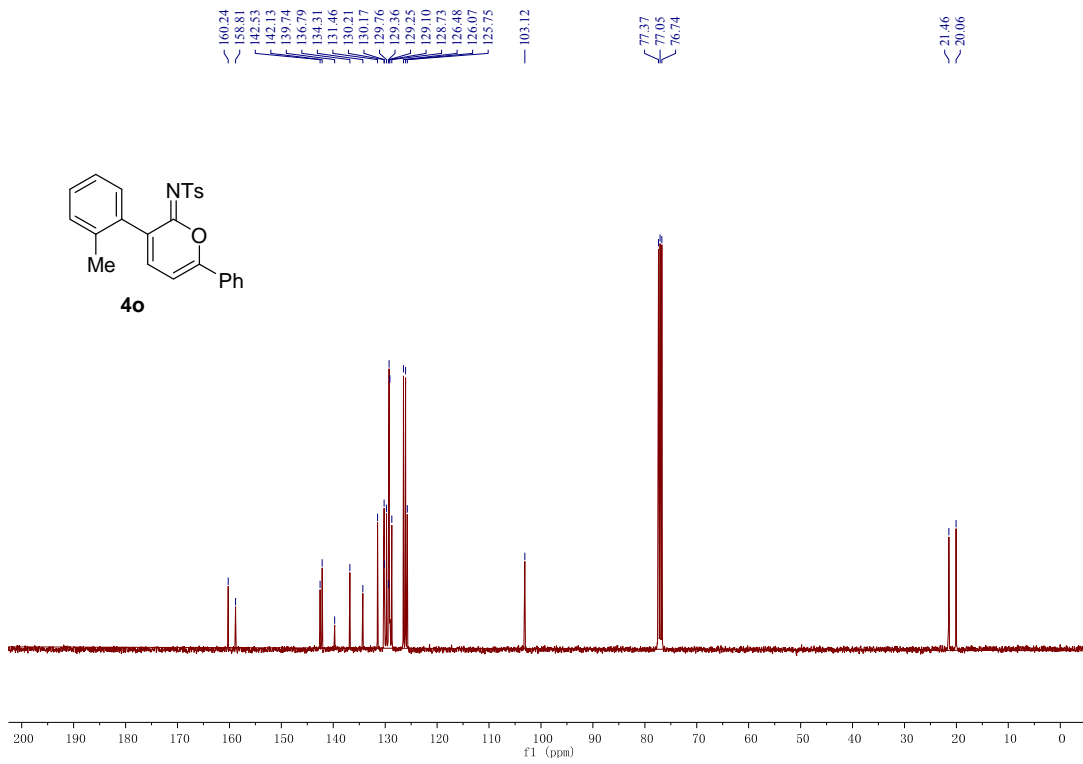



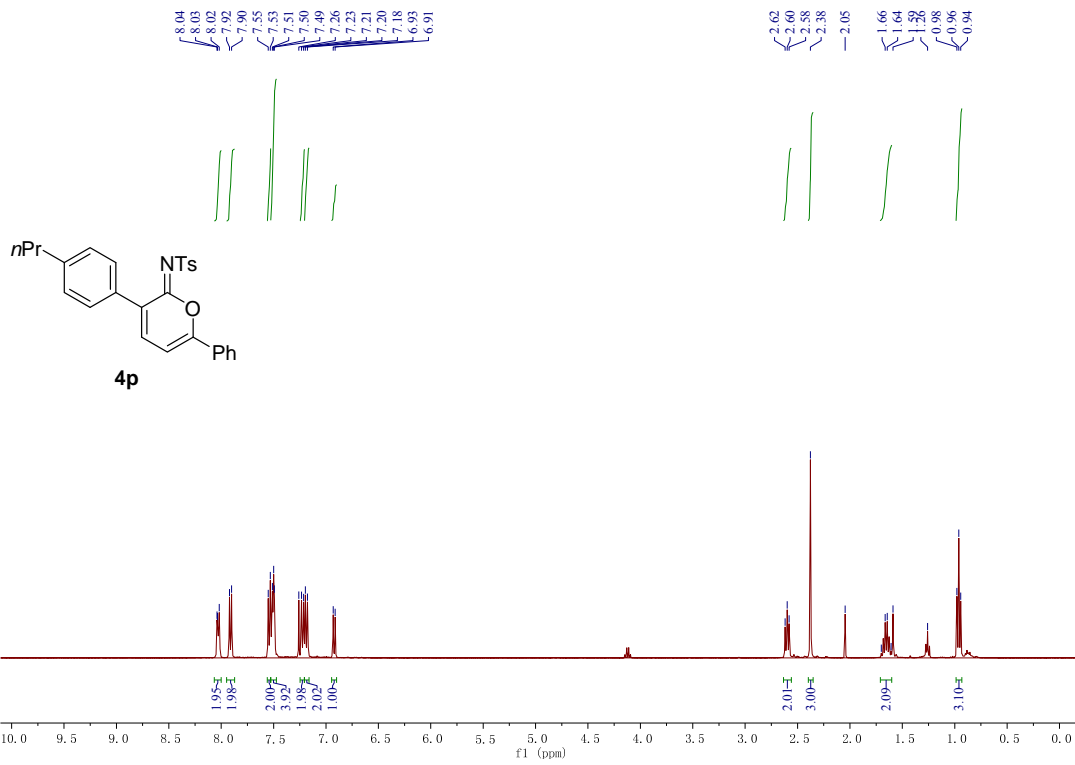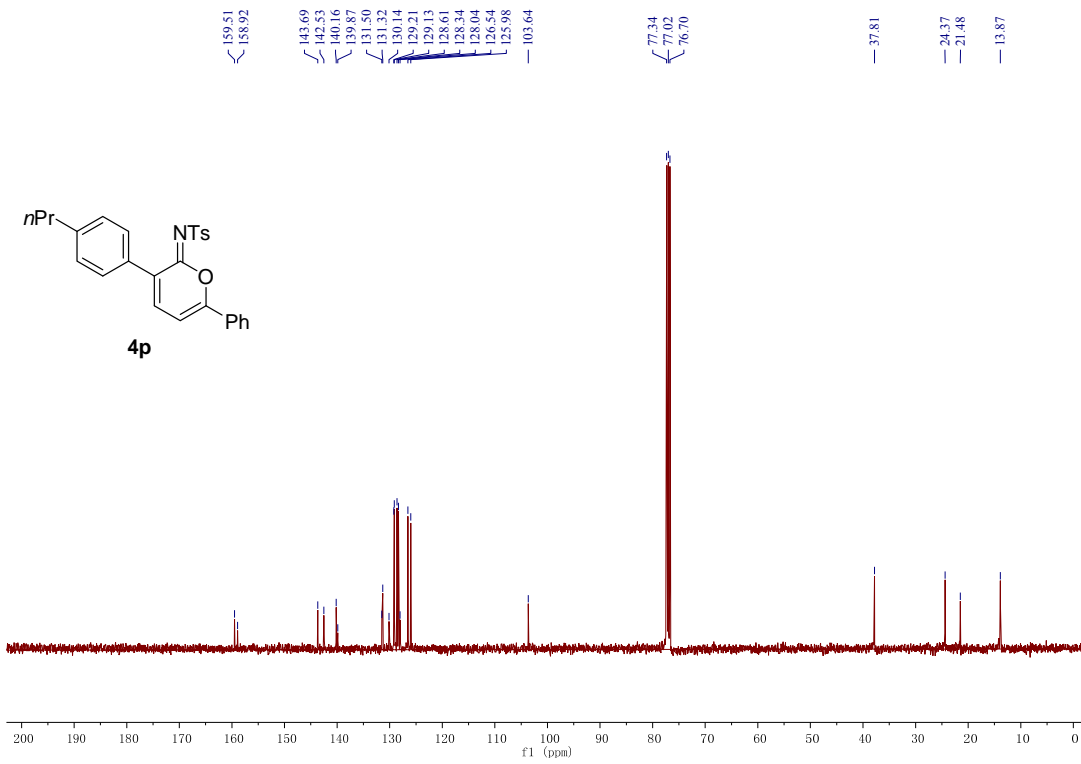

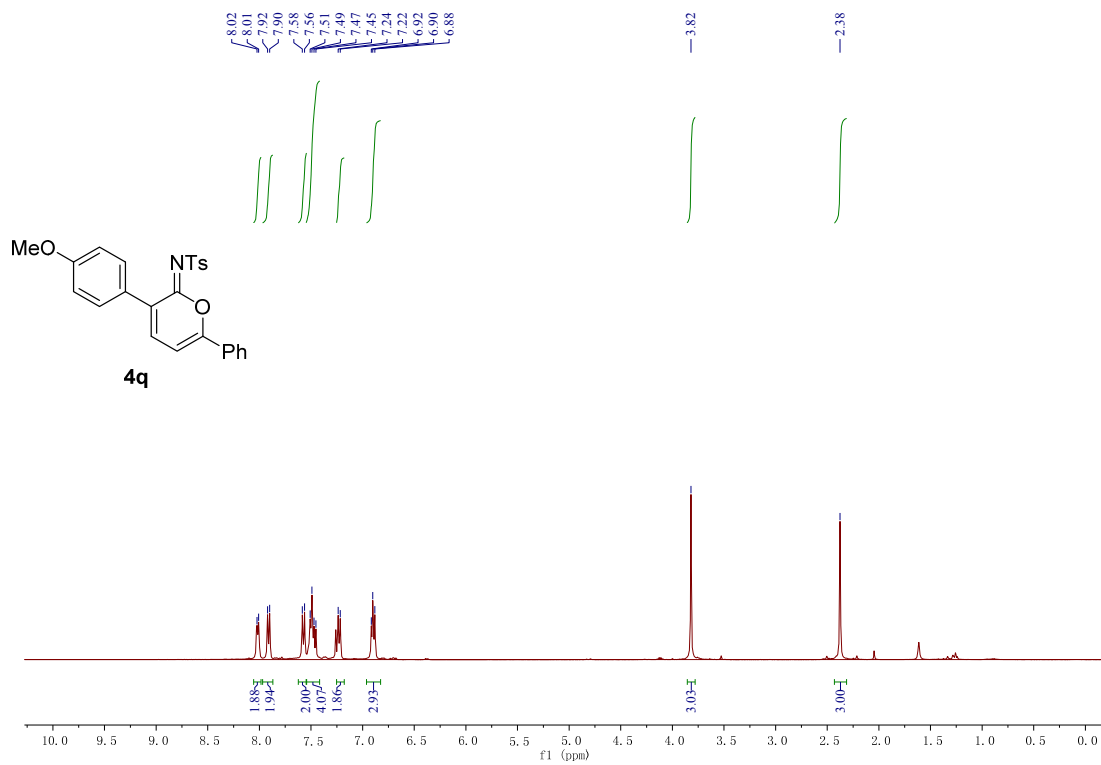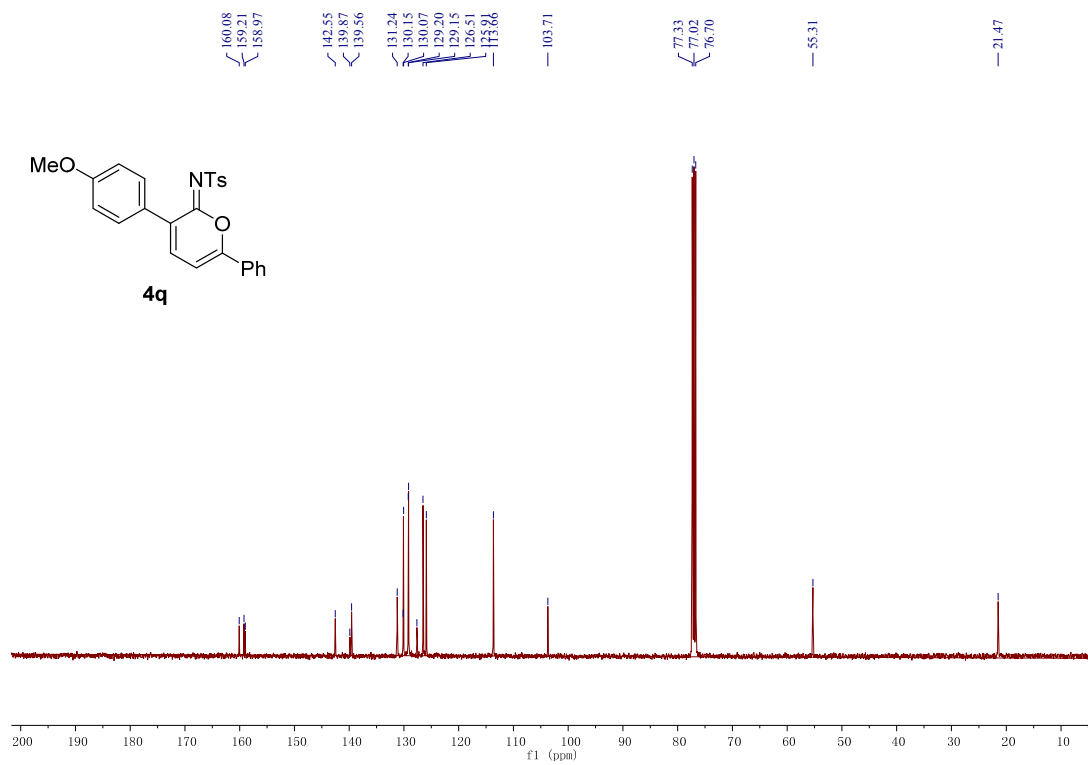

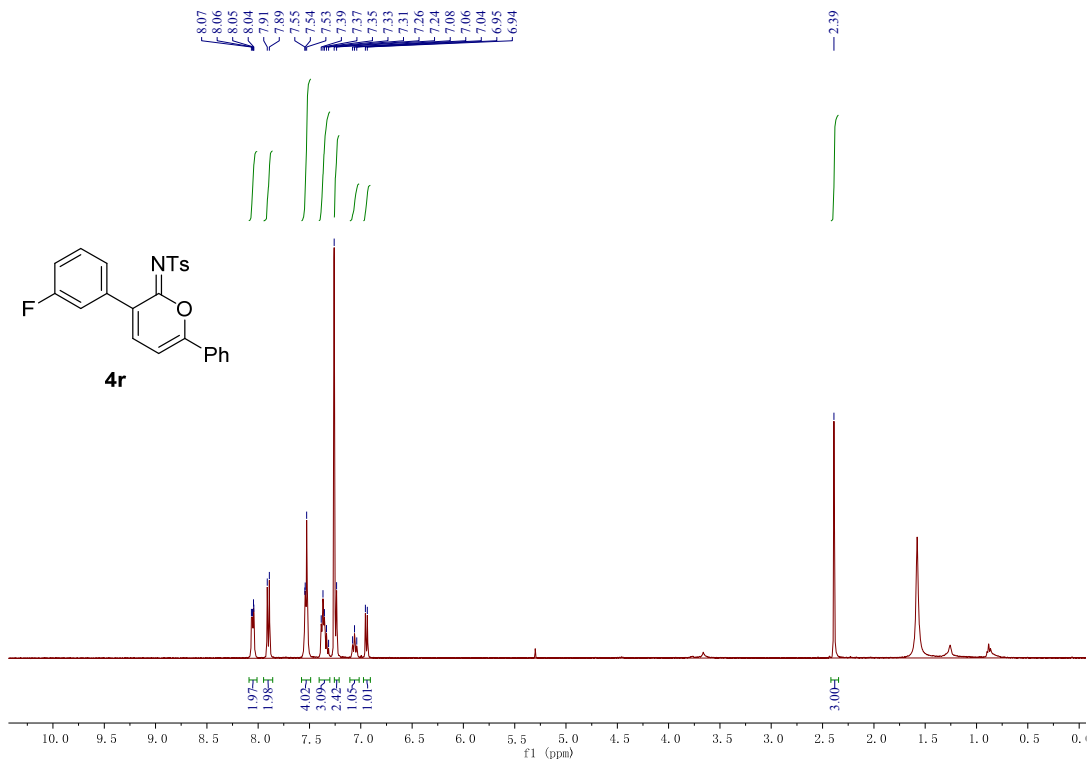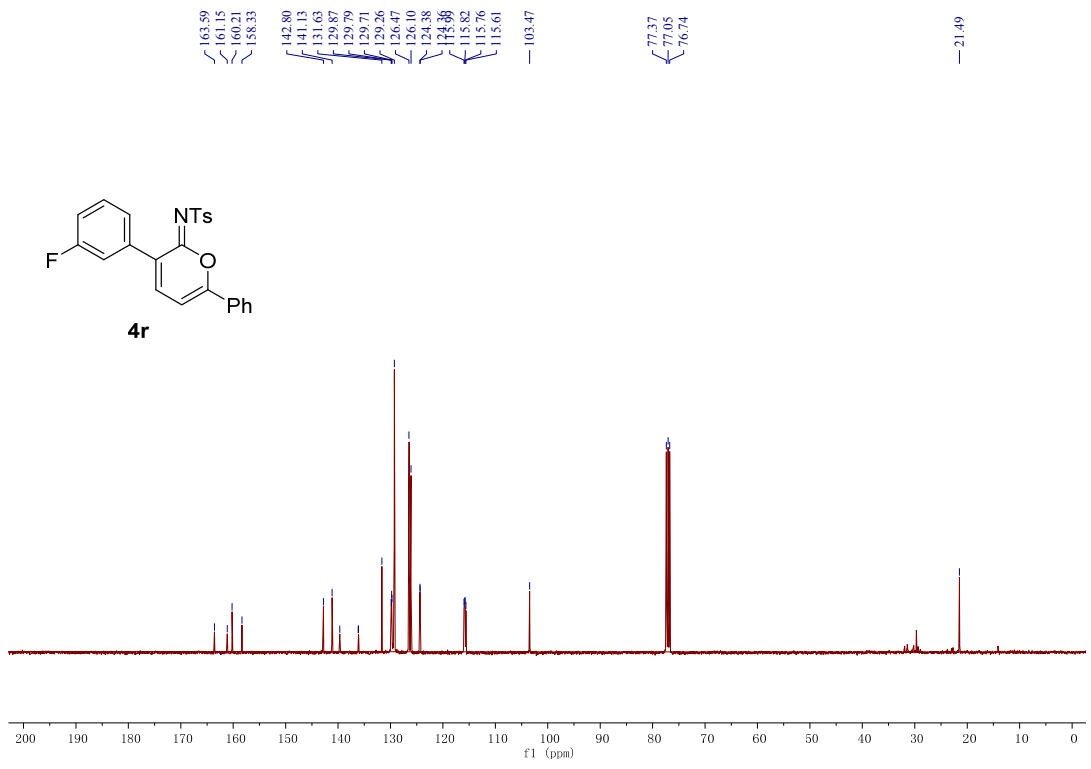

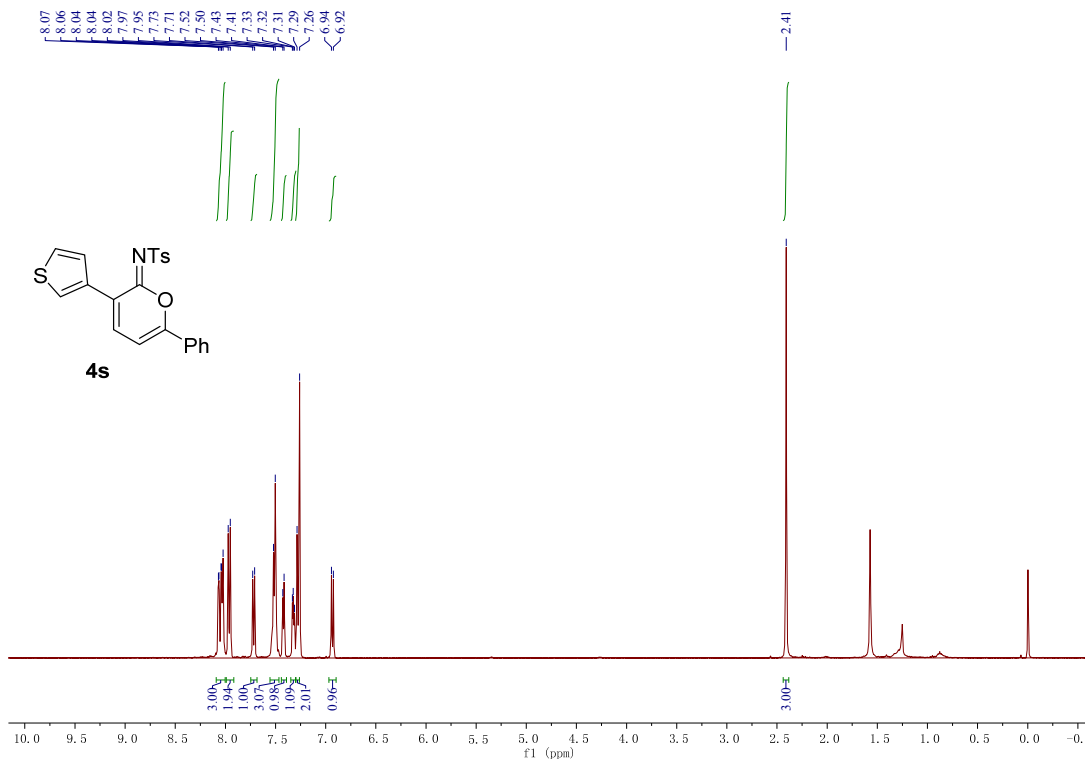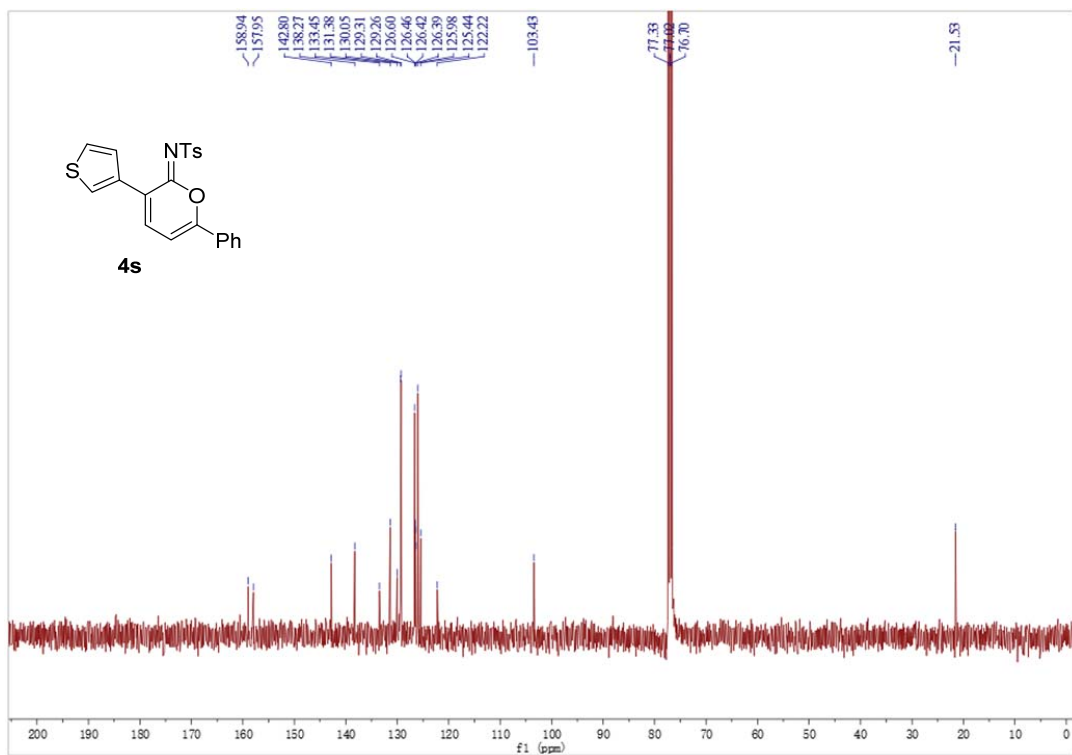

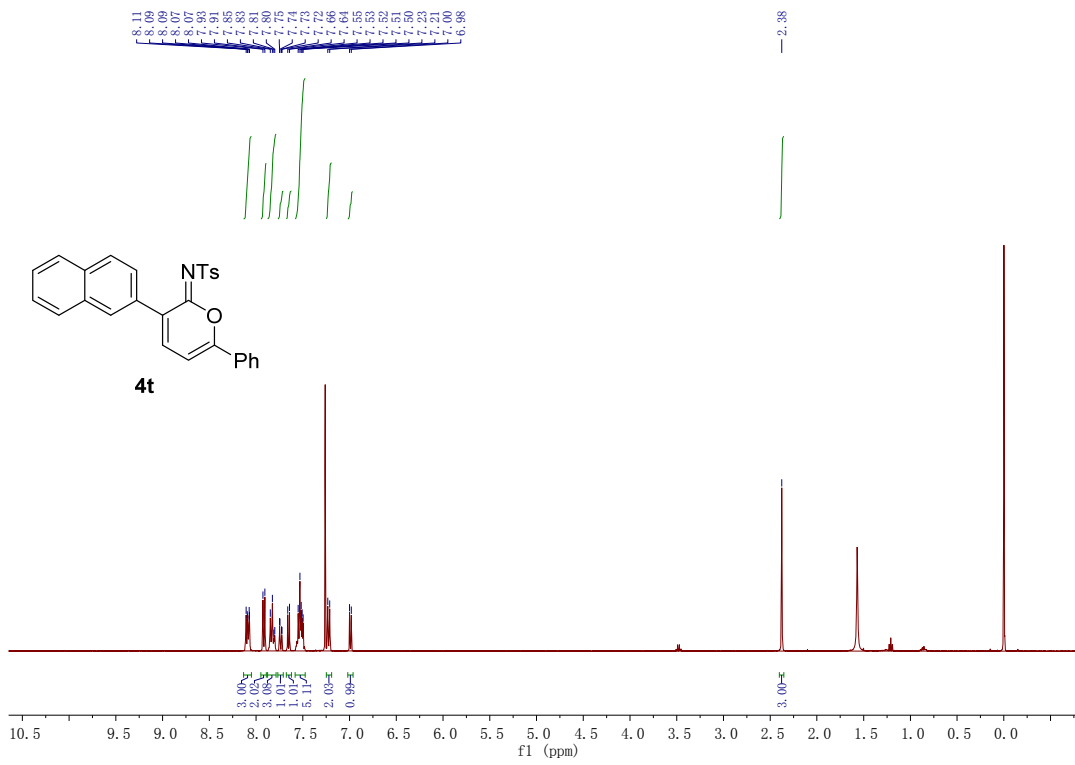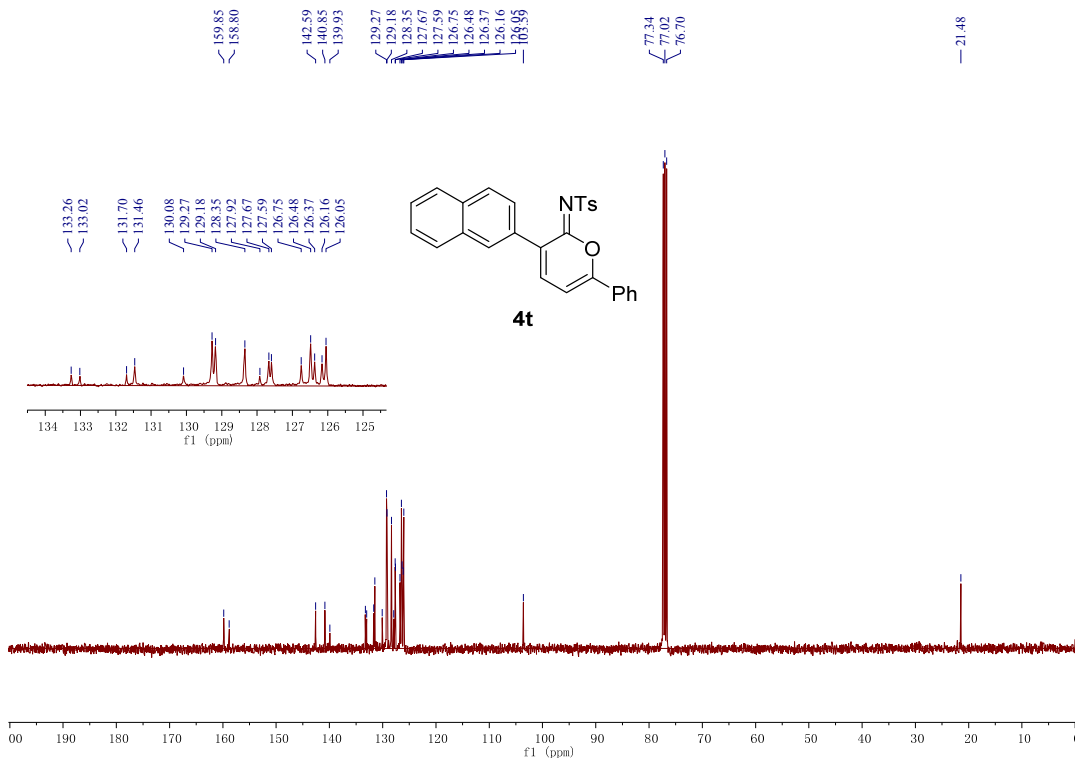

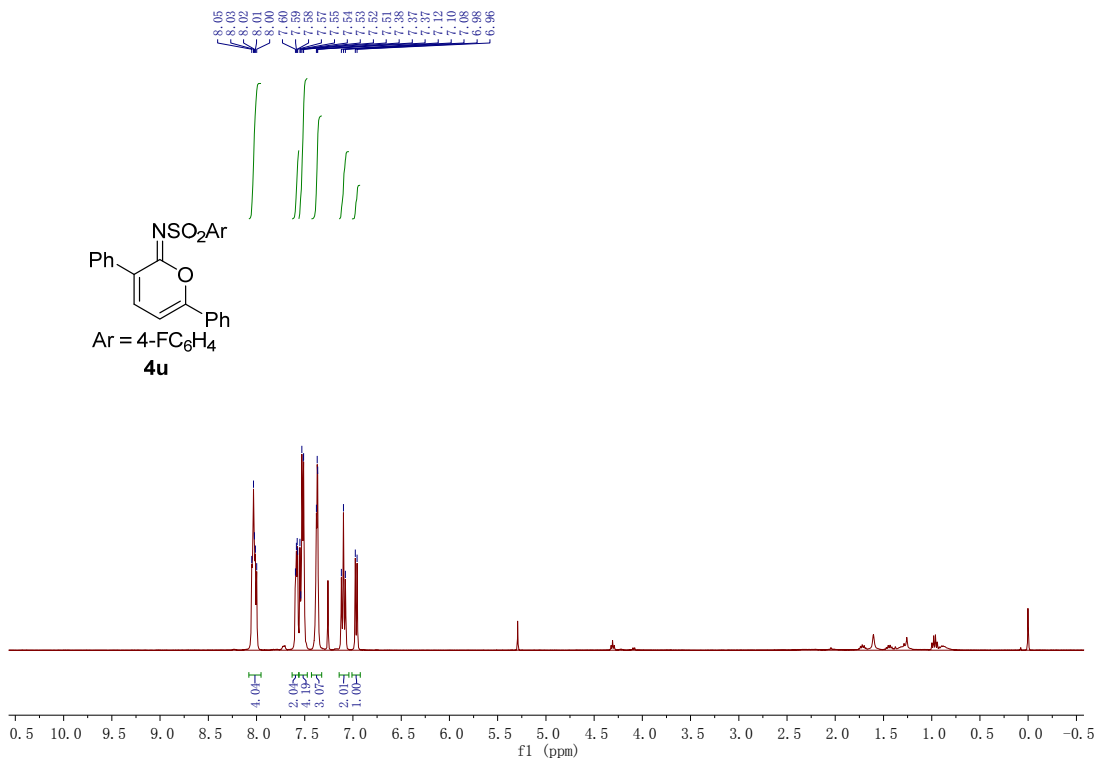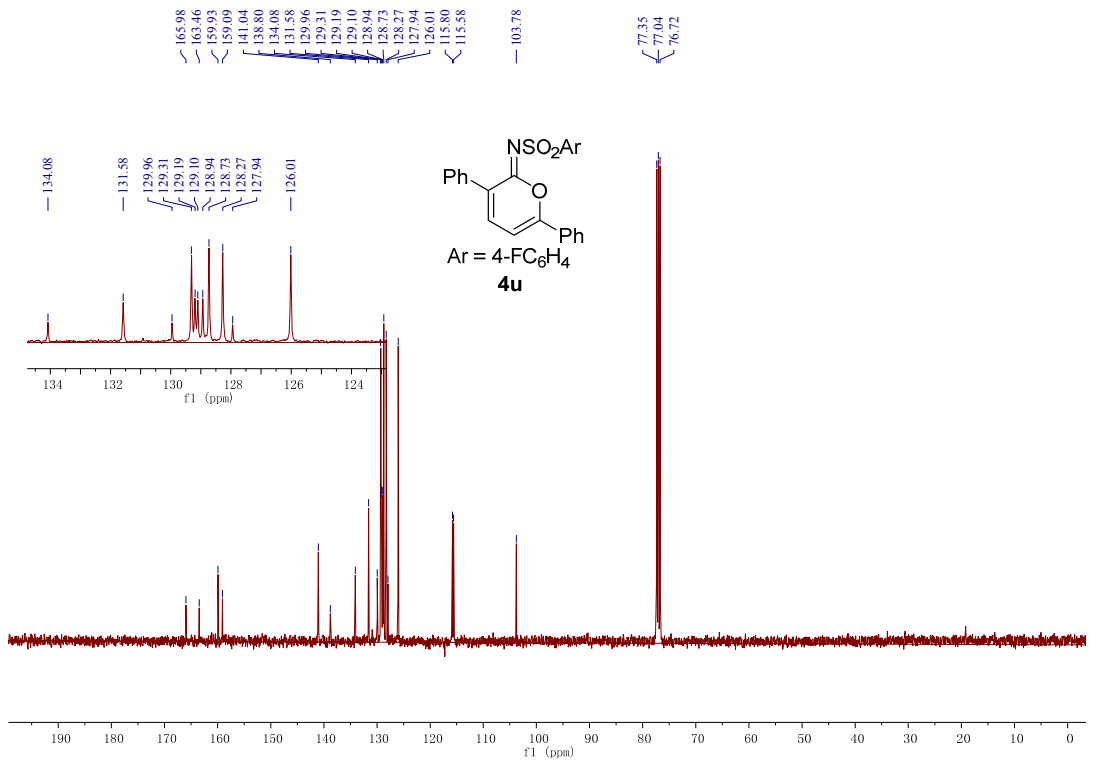

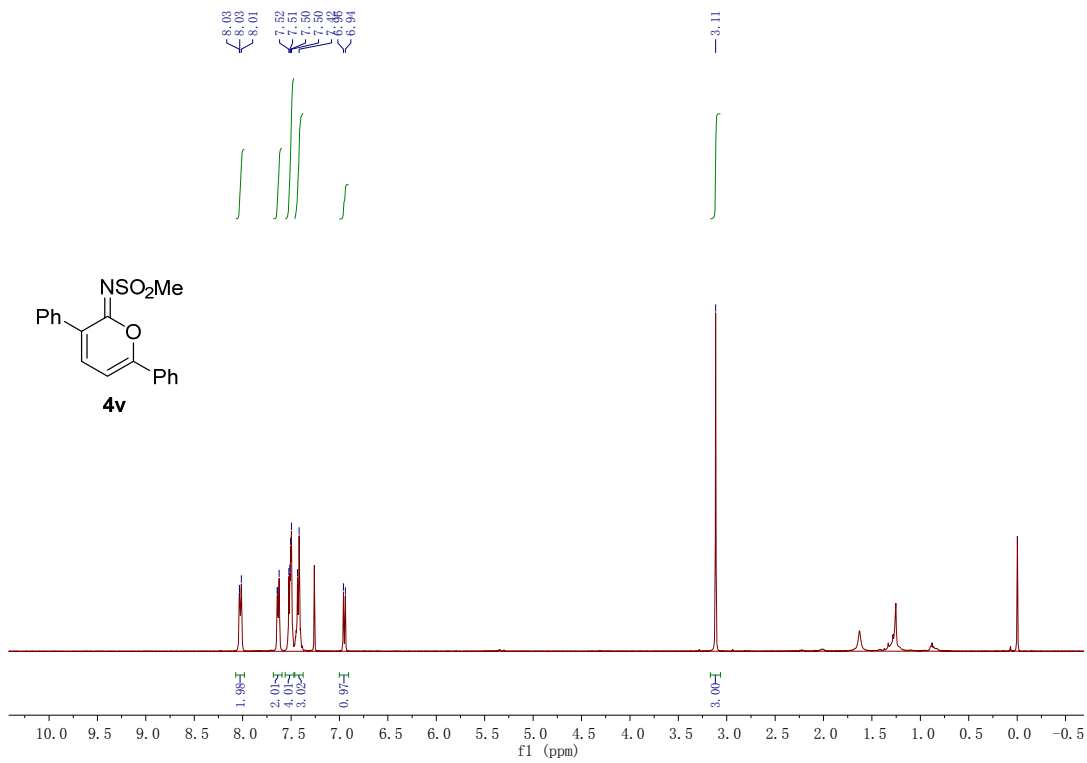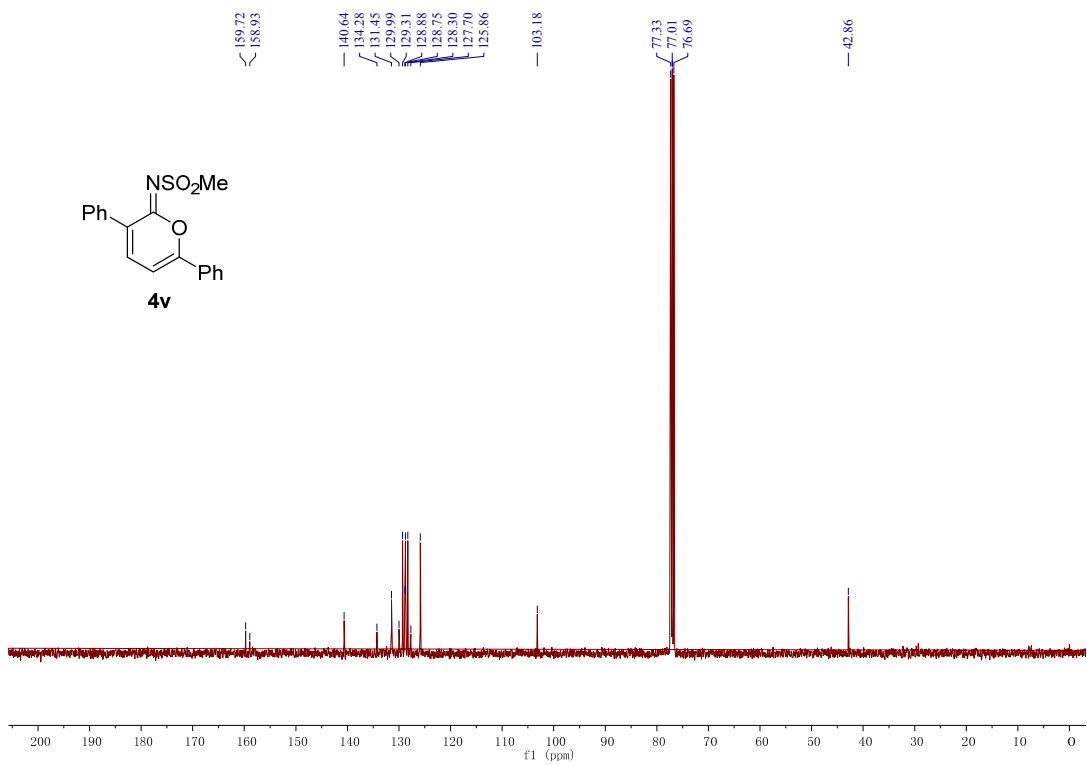

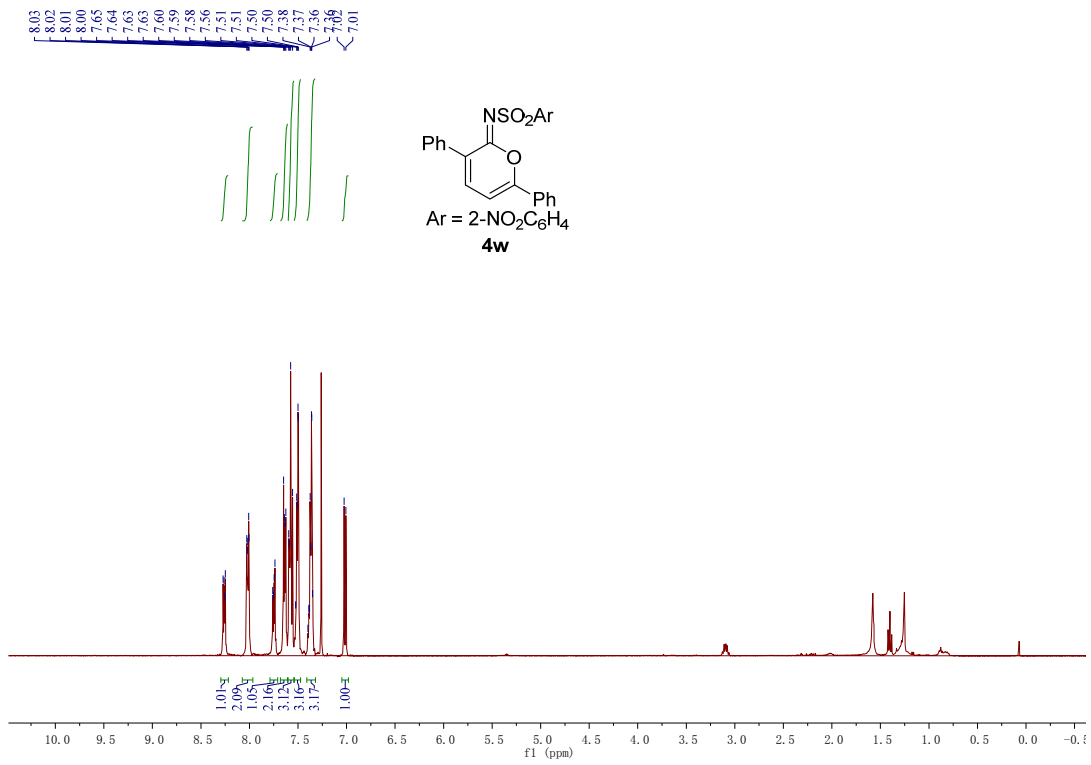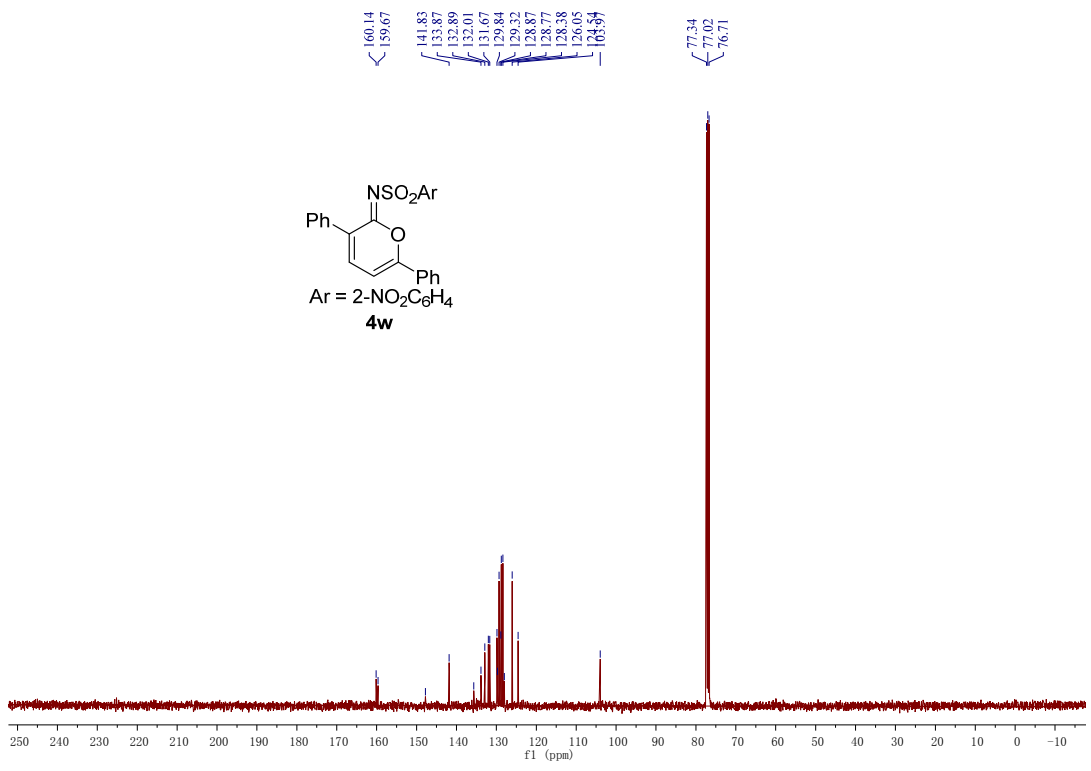



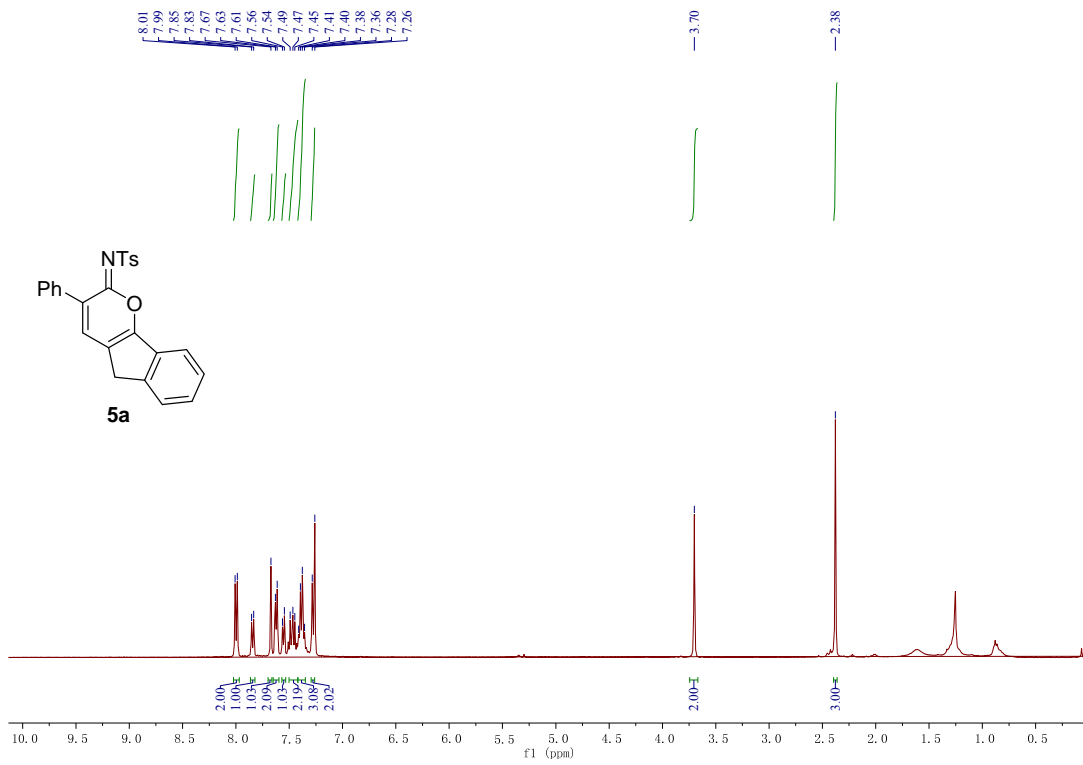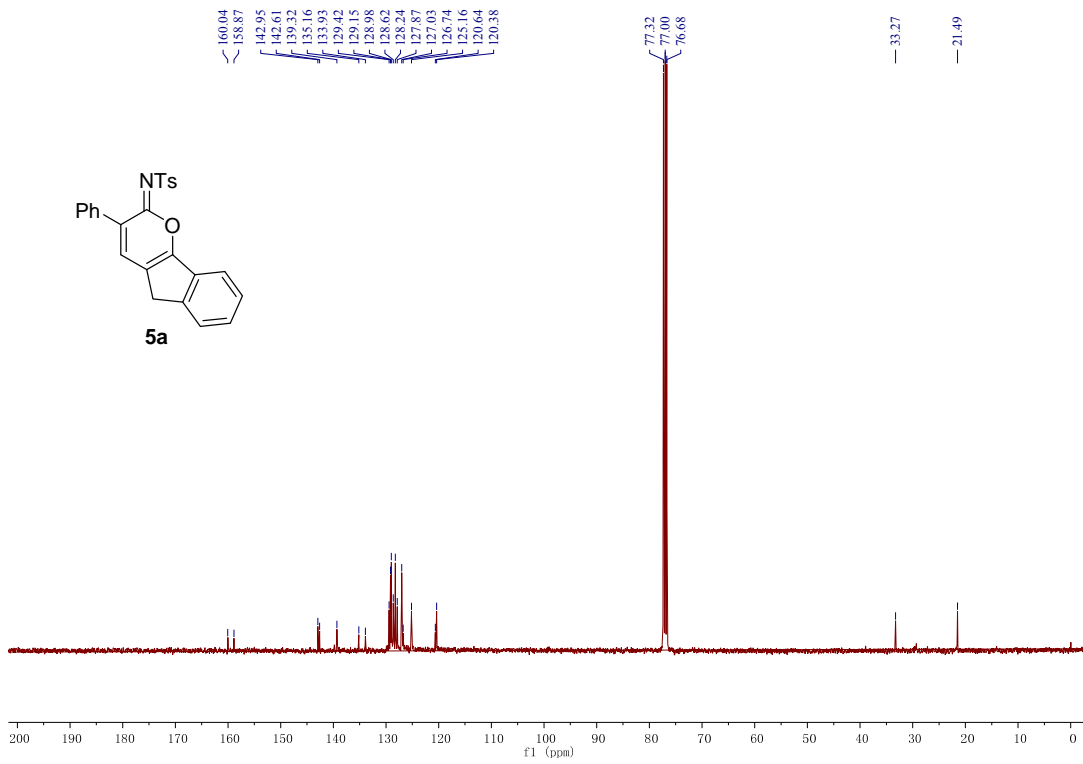

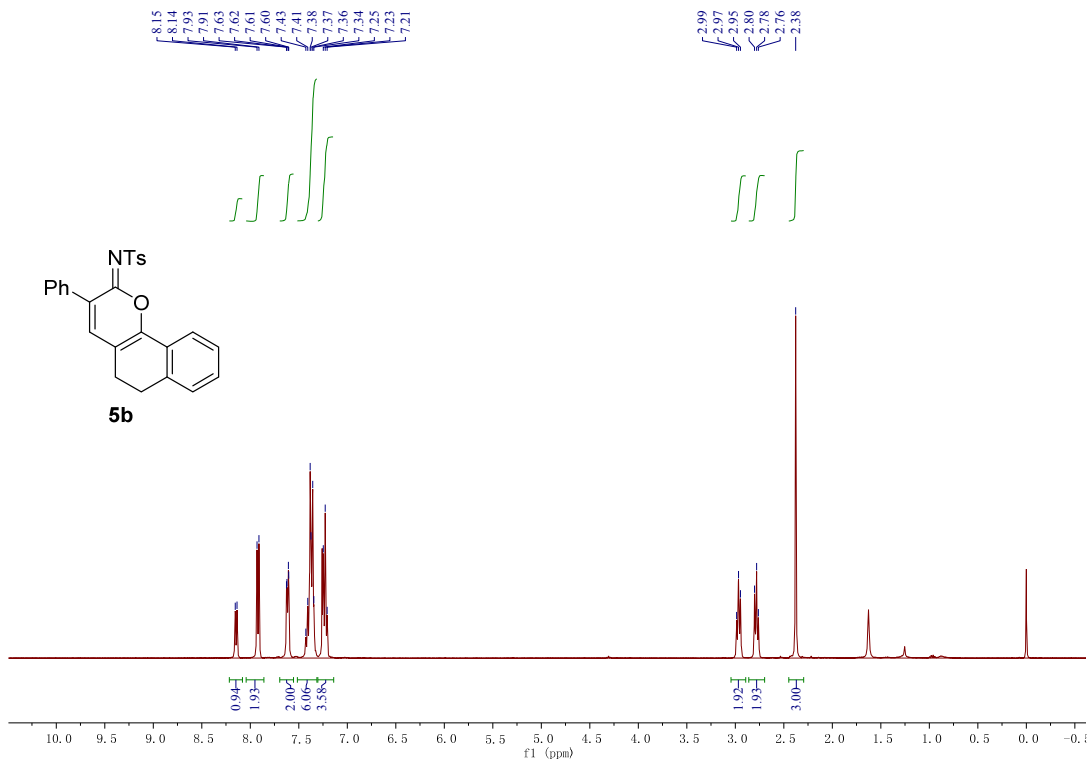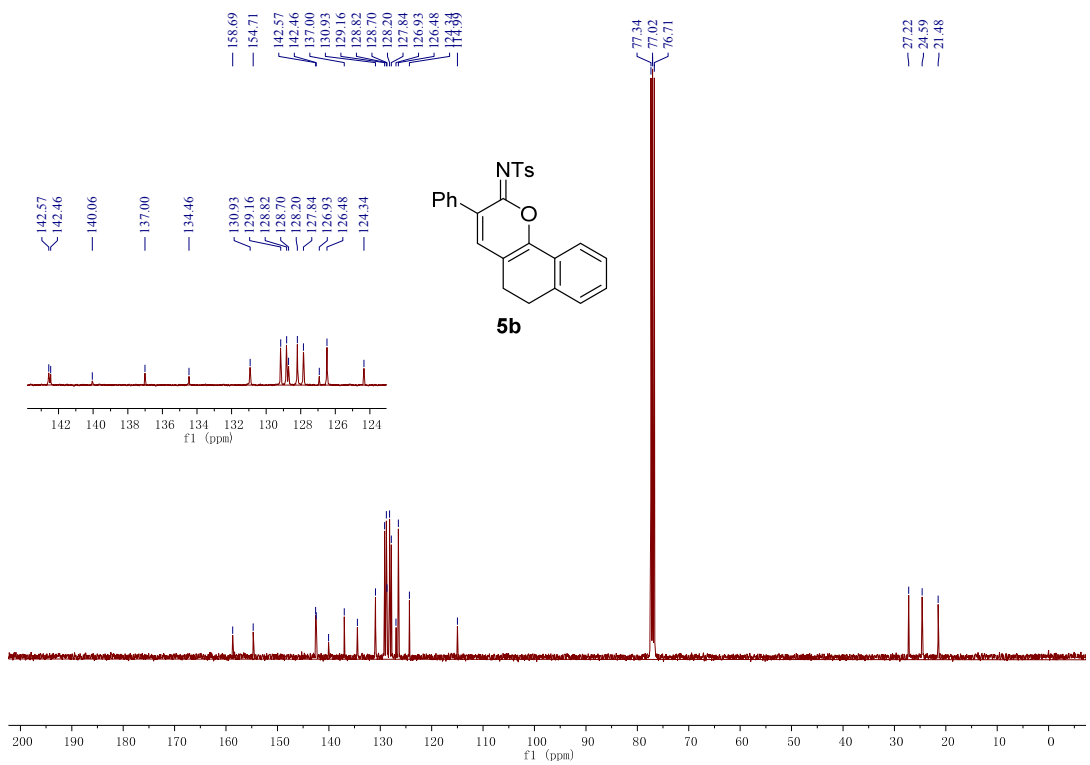

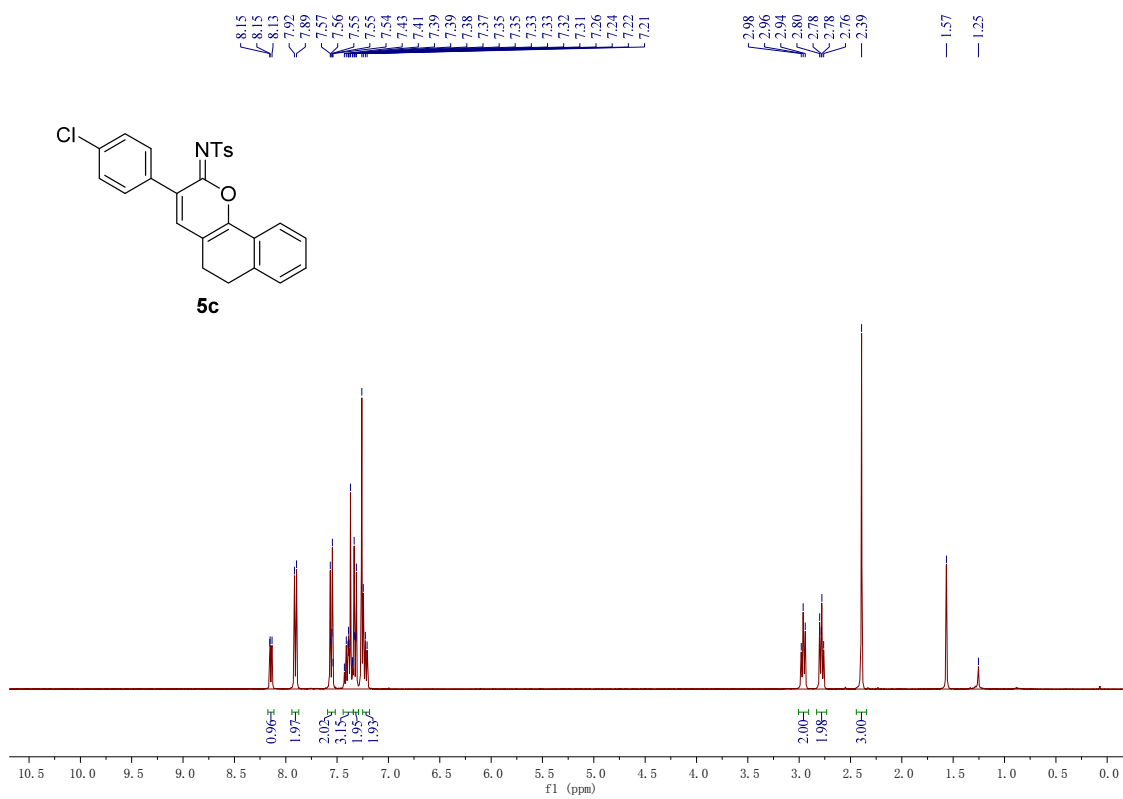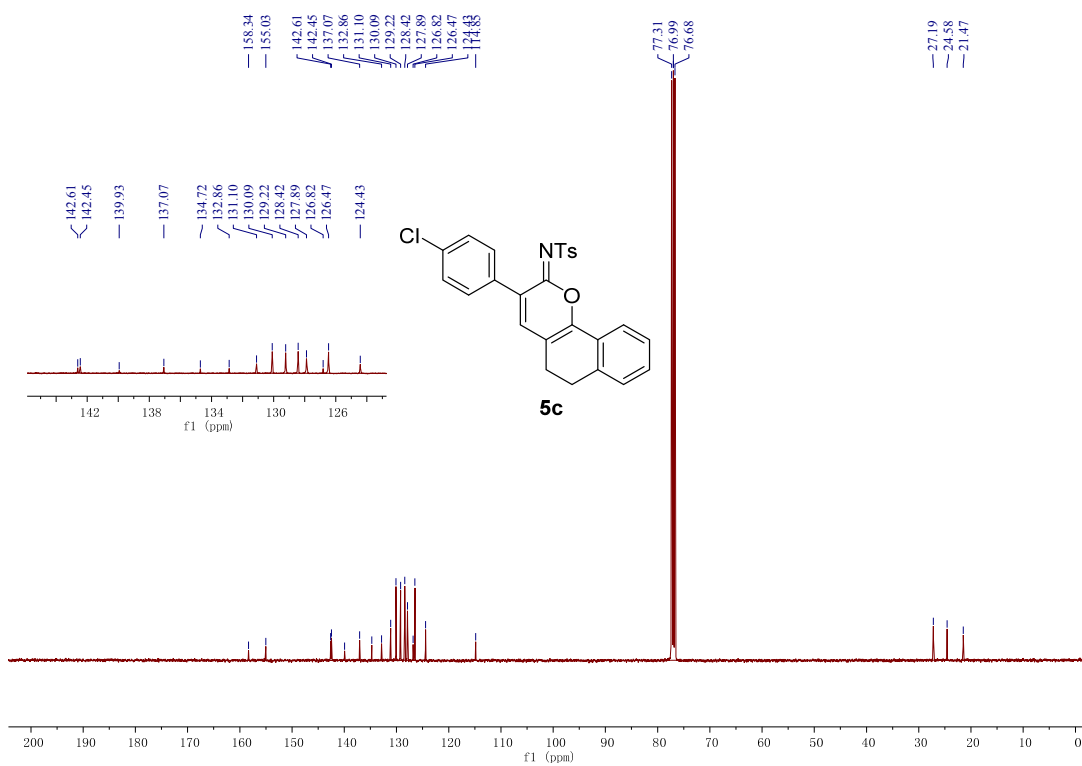

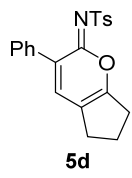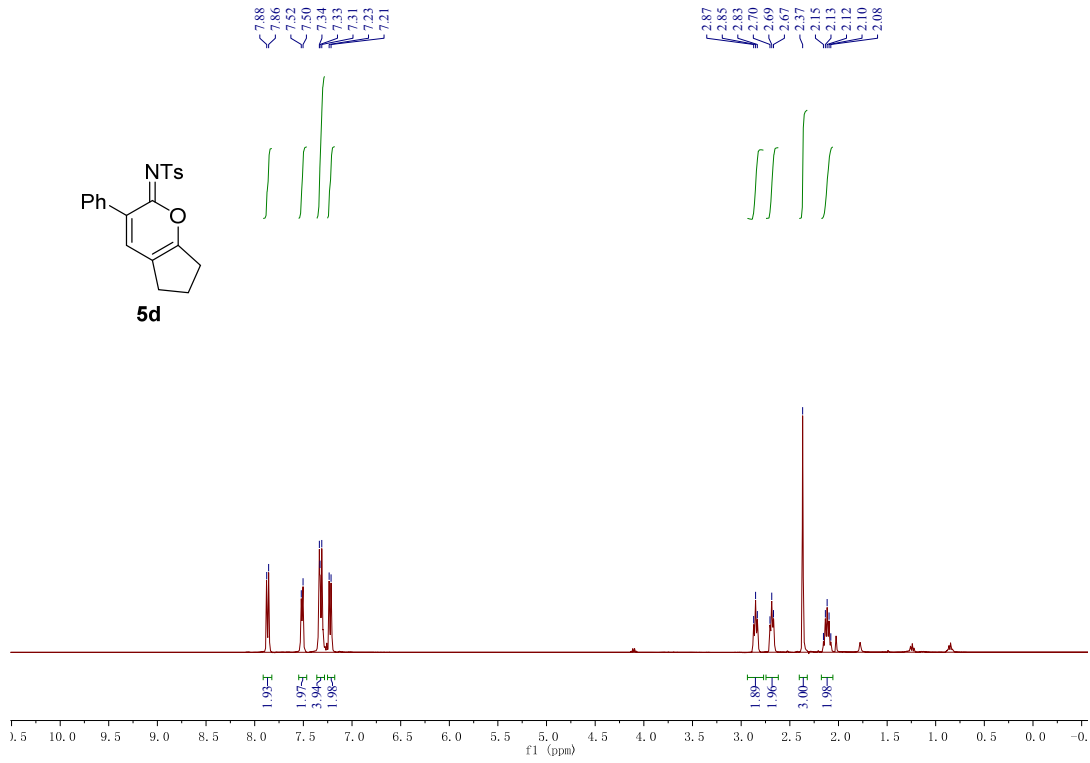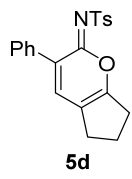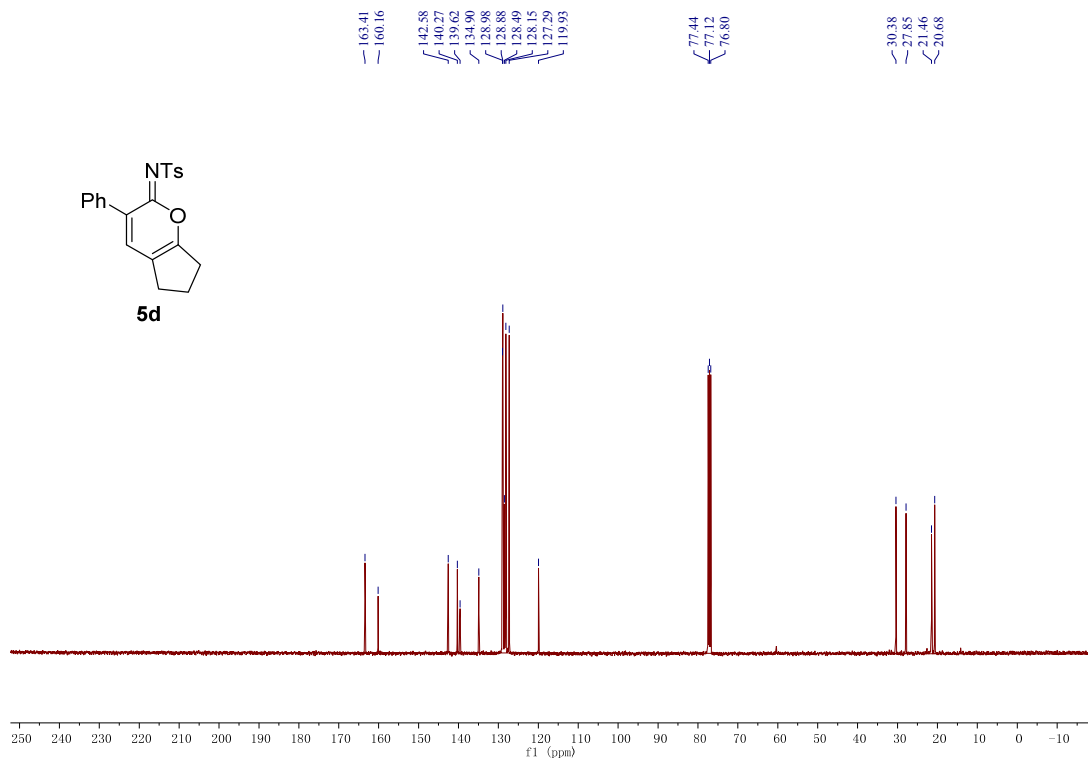

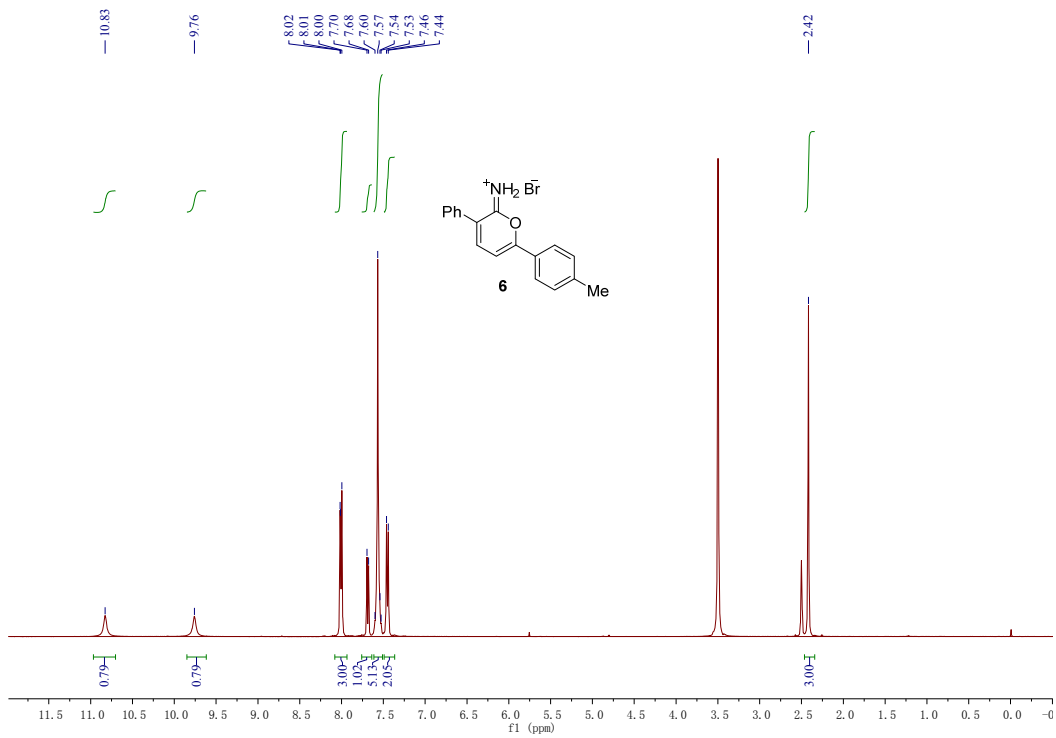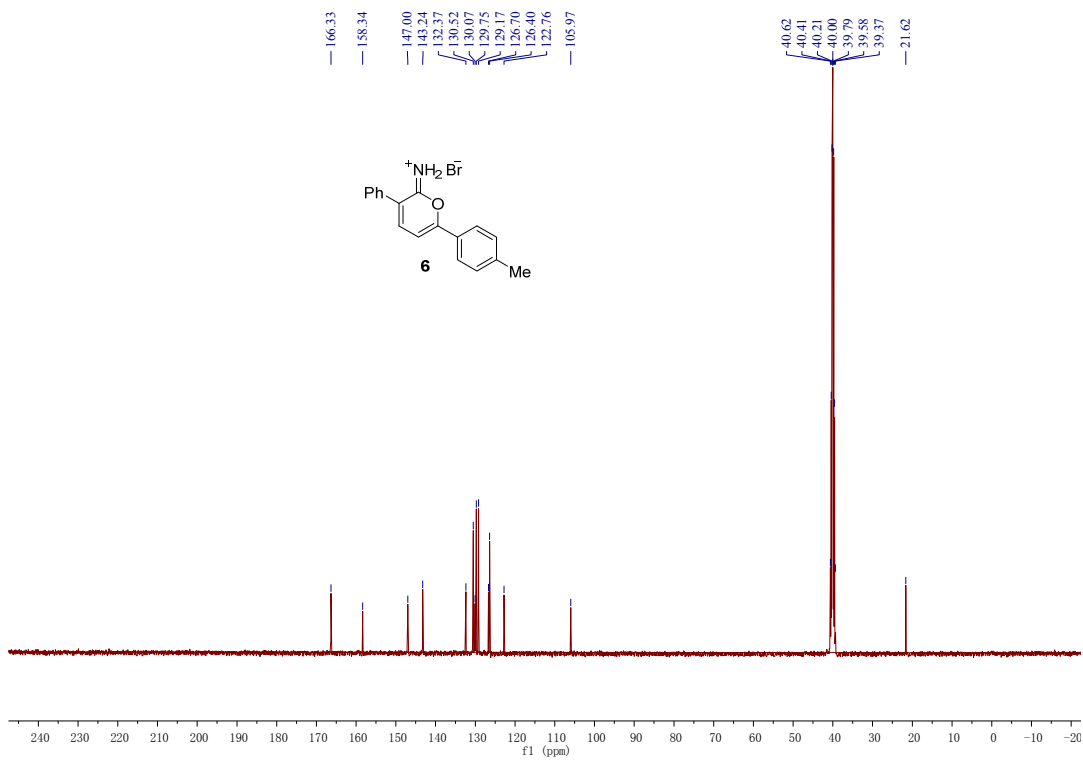

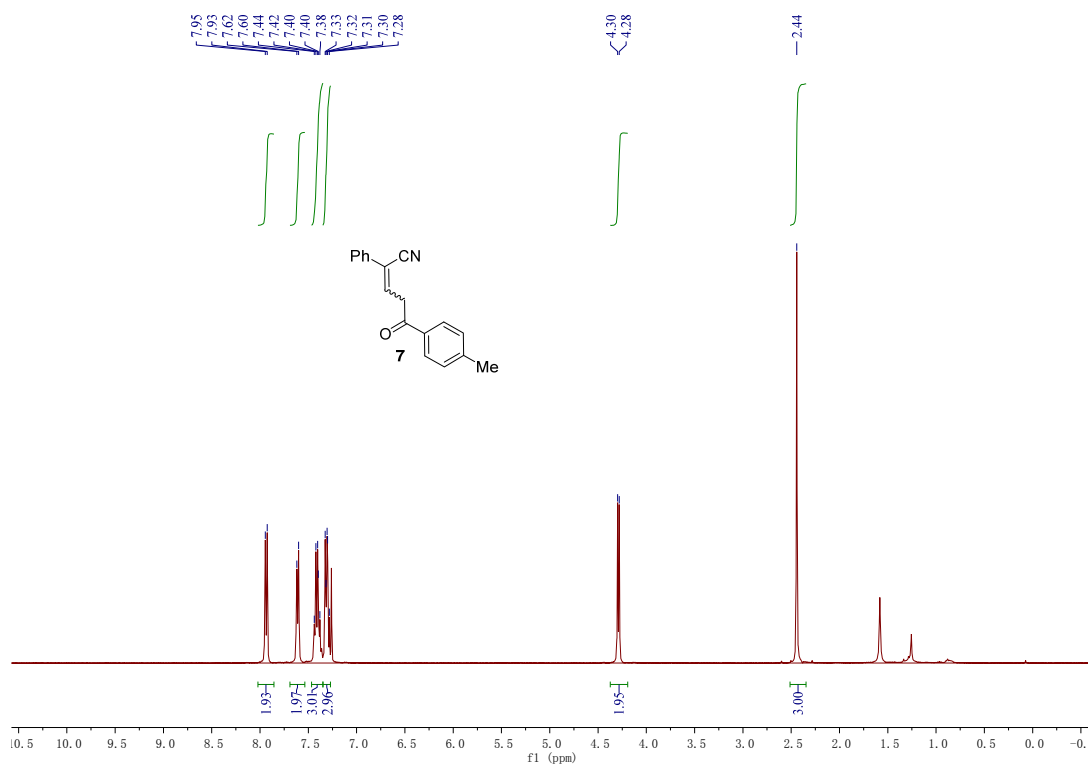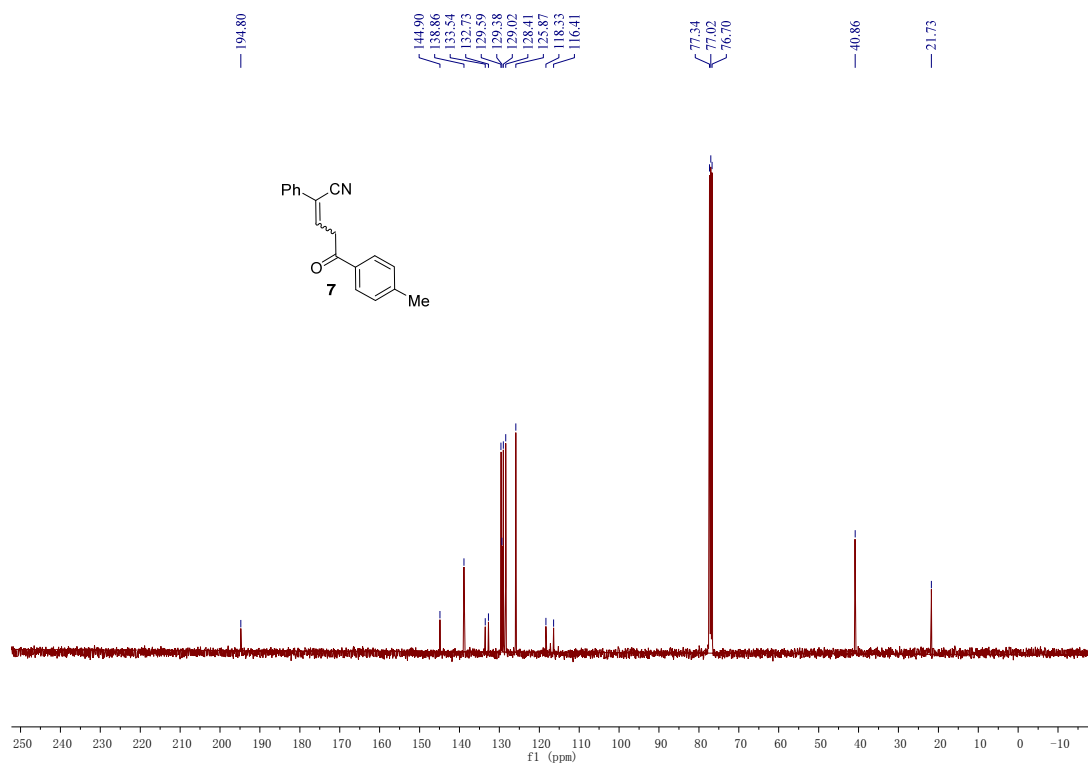

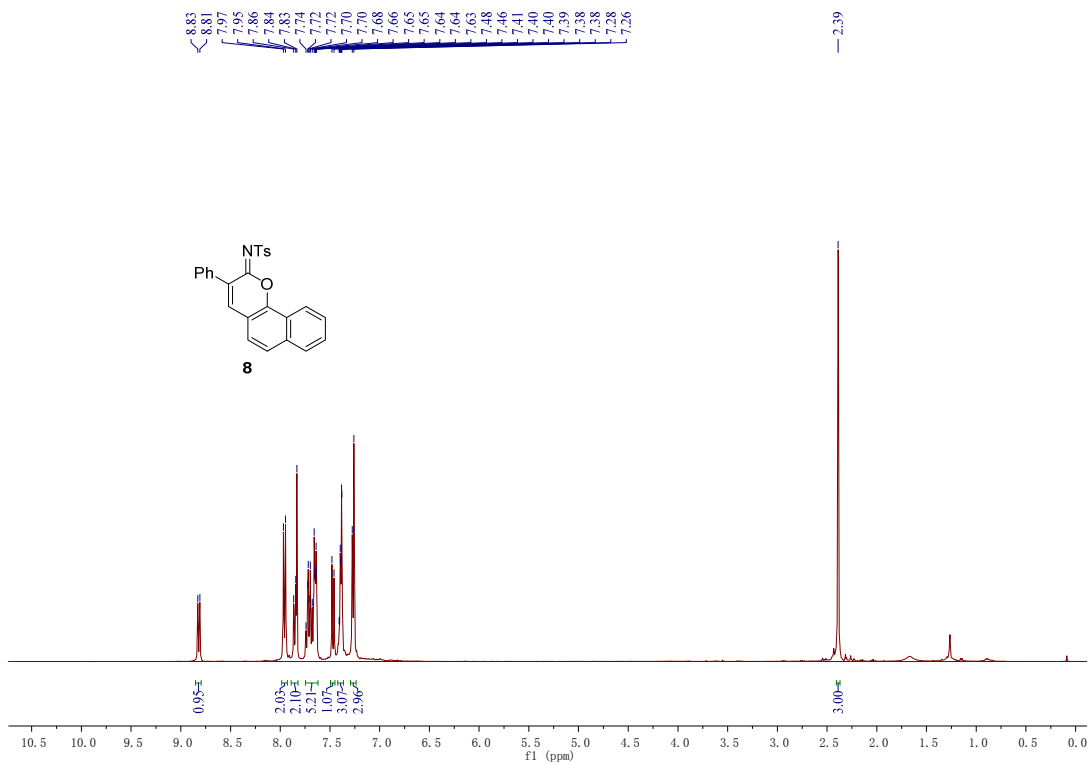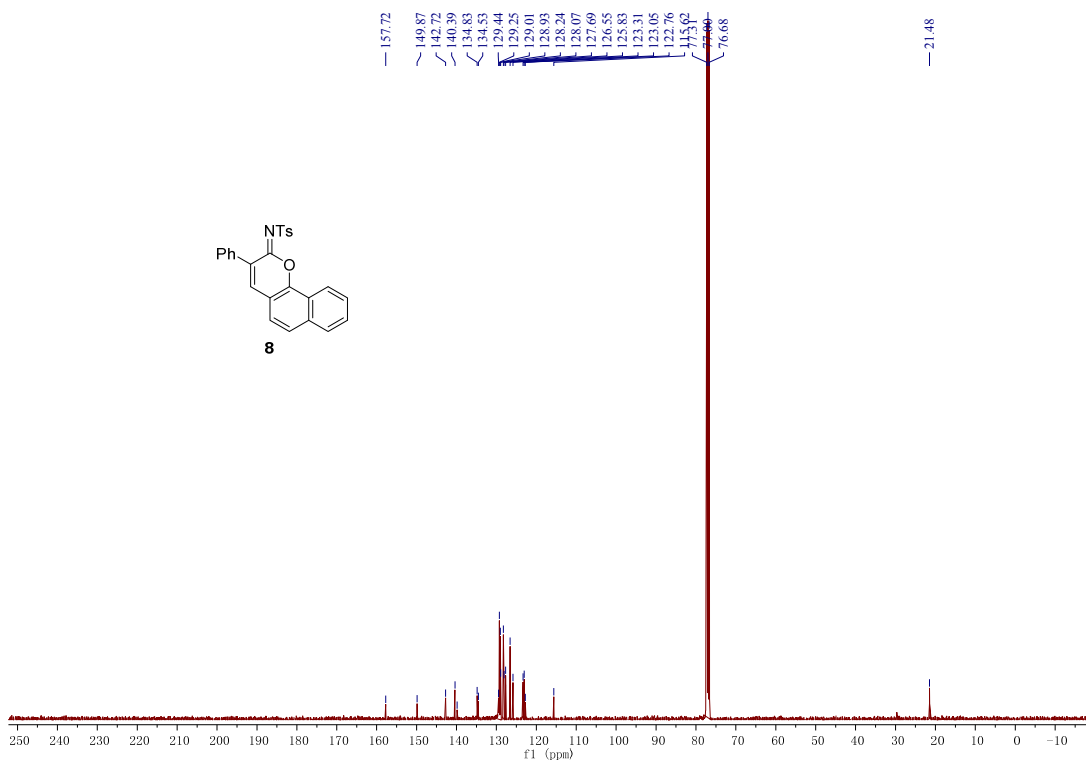

8.54  
8.52  
8.21  
8.19  
7.80  
7.77  
7.75  
7.72  
7.70  
7.68  
7.66  
7.50  
7.48  
7.46  
7.45

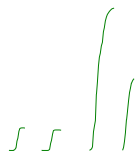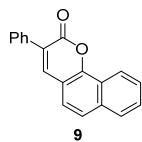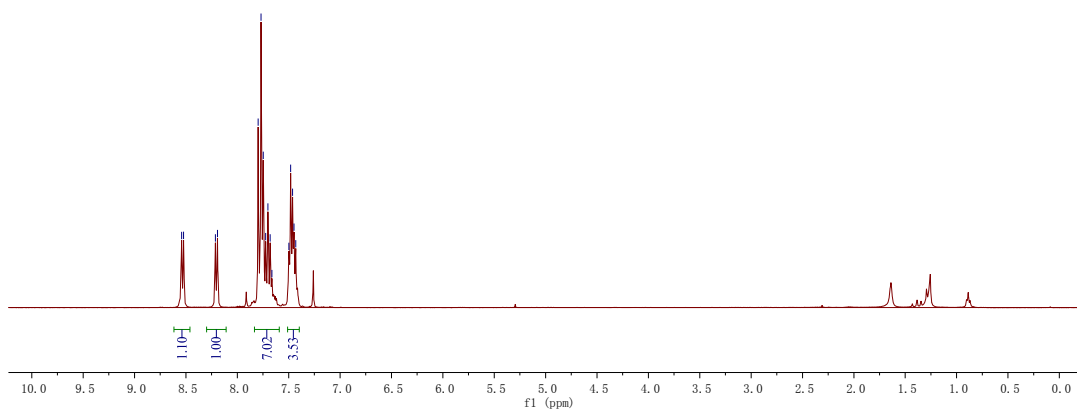

159.97  
149.88  
139.07  
134.39  
132.54  
132.54  
129.73  
129.08  
128.59  
128.46  
128.37  
127.96  
127.41  
126.91  
123.85  
122.70  
117.99  
115.66  
77.36  
77.04  
76.73

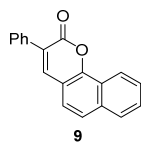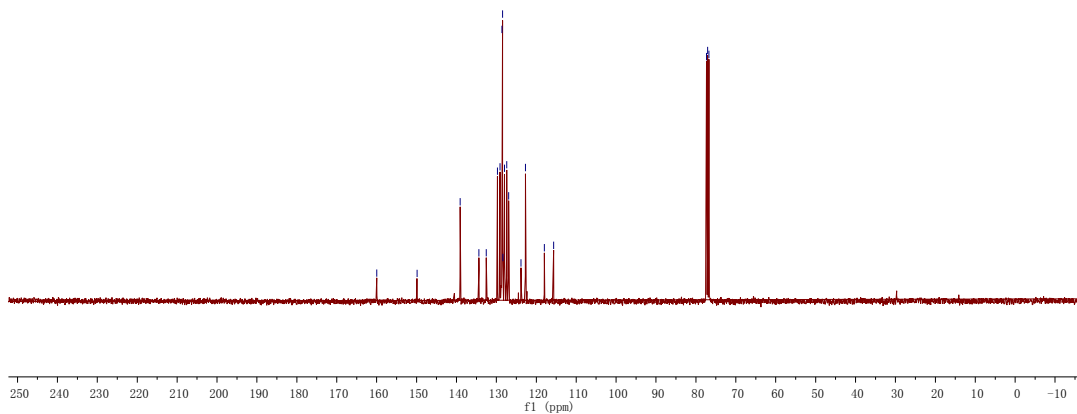

Supplement: c8cc06868b1.pdf [file c8cc06868b1.pdf]
